# Supplementary material for: Comparative Analysis of Proteome-Wide Lysine Acetylation in Juvenile and Adult Schistosoma japonicum
Source: Front Microbiol. 2017 Nov 21;8:2248. doi: 10.3389/fmicb.2017.02248 (PMC5715381; doi:10.3389/fmicb.2017.02248)
Supplement: Supplementary file 3 [file Table1.XLSX]

## Sheet: 18dpi-female
Supplementary Table S1. Identified Peptides and Proteins from 18dpi female worms. The table indicates the name of the identified protein, the sequence of the observed peptide, number of miscleavages and the charge states that were observed.
Sequence	Protein Accessions	Area	IonScore	Exp Value	Charge	MH+ [Da]	ΔM [ppm]	RT [min]	# Missed Cleavages
QAIAkYIK	Sjc_0000130	1.25001e+07	43.01	0.000212515	2	976.58	-3.12304	28.7087	1
qAIAkYIK	Sjc_0000130	1.50698e+07	34.57	0.00343903	2	959.554	-2.09846	37.6414	1
TPSAHPPYGDmIkK	Sjc_0000130	2.61441e+06	22.93	0.0455851	2	1599.78	-3.05491	24.5947	1
SIYGNkFEDESFDNK	Sjc_0001030	3.57188e+07	65.15	1.0845e-06	2	1834.81	-3.3431	35.3707	1
FEDESFDNkHDKK	Sjc_0001030	1.46409e+06	55.31	8.24438e-06	2	1680.74	-4.73795	22.9562	2
GYGYkNSTFHR	Sjc_0001030	7.70818e+06	24.97	0.0171947	2	1371.64	-4.77351	25.8214	1
LEEEAIkYK	Sjc_0001510	8.62284e+06	38.67	0.00162998	2	1164.61	-4.34443	28.2009	1
RLEEEAIkYK	Sjc_0001510	2.33008e+07	29.26	0.0160672	2	1320.71	-3.8656	25.9614	2
INFHFEkNEWFK	Sjc_0002330	2.64741e+07	42.72	0.000545256	3	1680.82	-0.748636	38.5851	1
VEQkFNK	Sjc_0002330	4.41278e+06	32.77	0.00649988	2	934.495	-4.87832	22.1364	1
DLTDYLMkILTER	Sjc_0002370;Sjc_0042620	1.57235e+06	54.81	4.36088e-05	2	1652.85	-2.4889	53.2451	1
TIGGGDDSFNTFFSETGAGkHVPR	Sjc_0004280	4.18875e+07	20.72	0.0643893	3	2539.18	-3.20353	37.7429	1
MSENPISNNVPVkFR	Sjc_0004470	85248148	49.93	0.000134653	2	1773.89	-3.58122	35.3405	1
LkHTLK	Sjc_0005910	716845	22.87	0.0102626	2	781.489	-5.05956	18.4426	1
SNSIGkNISTNR	Sjc_0006120	3594276	47.28	0.000245995	2	1332.68	-4.19337	25.2737	1
IIGSkkDQYFLDK	Sjc_0007580	3.67746e+07	44.28	0.00038818	2	1638.87	-4.31059	35.7871	2
TDQDISSkHIEEHSK	Sjc_0008400	3.54462e+07	54.11	2.87231e-05	2	1795.84	-3.80965	21.7479	1
mkQQQkQQR	Sjc_0009730	750372	48.69	0.000138587	2	1302.65	-5.5085	17.9248	2
MkQQQkQQR	Sjc_0009730	3.18486e+06	45.24	0.000353087	2	1286.66	-4.59563	18.4827	2
EYYYQPPTLTcLTPkFcTIYR	Sjc_0009730	2.28546e+08	44.29	0.000333291	2	2756.3	-2.76842	43.153	1
TSEAPSSTGkSGK	Sjc_0010800	1.6034e+06	51.6	5.94975e-05	2	1278.61	-4.59919	18.5049	1
YkSNENPWFFHK	Sjc_0011460	3.55044e+07	41.59	0.000502734	2	1638.77	-2.5639	34.2529	1
TVQNLLLEkIR	Sjc_0011870	1.28178e+07	29.86	0.00454415	2	1368.82	-1.70599	39.2432	1
RVELAEAVkHK	Sjc_0012620	2.36946e+07	47.3	0.000109863	3	1321.75	-3.62087	23.2664	2
GLkVNLVAR	Sjc_0012620	10803237	45.14	0.000110231	2	1011.63	-3.64798	31.7439	1
RPYNAAPVAkPFYGGYR	Sjc_0012620	2.03844e+07	25.59	0.0325748	3	1969	-4.08543	31.571	2
HSGkFSTAHK	Sjc_0013010	1.25515e+06	25.79	0.0195089	3	1141.57	-5.17921	17.817	1
SVAEFEkLNR	Sjc_0014710	1.23284e+07	41.19	0.00103785	2	1234.64	-5.88249	32.1071	1
HTLHkVTQYK	Sjc_0015000	6.41146e+06	29.18	0.0116554	2	1296.7	-5.12837	20.2173	1
VVSGkAAkK	Sjc_0016080	3.37987e+07	57.16	2.02886e-05	2	971.584	-5.06144	20.0469	2
AVTkYSGSK	Sjc_0016080	2.79169e+07	46.47	0.000166814	2	982.516	-4.82812	20.8014	1
ASkVkLPK	Sjc_0016080	1.43435e+08	34.74	0.000856131	2	954.594	-4.25988	26.1349	2
LLLPGELAkHAVSEGTK	Sjc_0016080;Sjc_0036400	9.57886e+07	105.19	2.30045e-10	2	1805.01	-5.02949	35.7126	1
GVLkVFLENVIR	Sjc_0016100	2.02718e+07	60.18	4.26933e-06	2	1428.85	-1.90673	47.0813	1
GkGGkGLGK	Sjc_0016100	1.1181e+08	44.91	0.000398719	2	885.511	-4.33662	21.3166	2
GGkGLGkGGAK	Sjc_0016100	1.53819e+08	39.29	0.00100685	2	1013.57	-4.62807	21.9855	2
GLGkGGAkR	Sjc_0016100	1.41021e+09	38.33	0.000984181	2	927.534	-3.75659	22.3127	2
GLGkGGAK	Sjc_0016100	5.29469e+06	22.33	0.0564322	2	729.423	-3.53454	19.4515	1
YVIHcPDKEAMTSkHLER	Sjc_0019830	11804744	32.06	0.00690753	3	2256.08	-4.30565	26.4913	2
TPSTkHNSSSSGAPNPSVYK	Sjc_0022300	5.57391e+06	45.04	0.000261629	3	2087.99	-3.97289	22.4675	1
LYRPVSkLDSK	Sjc_0023880	6.70629e+06	29.15	0.00985111	2	1347.76	-3.72623	26.6187	2
GVEVVSYkHGDGK	Sjc_0025140	2811438	40.64	0.000806885	2	1416.7	-4.90202	25.1321	1
VVGkSQSSMK	Sjc_0025560	4.50314e+07	46.51	0.000271379	2	1092.57	-4.13518	20.8586	1
VVGkSQSSmK	Sjc_0025560	2.21784e+07	45.49	0.000299437	2	1108.56	-4.44371	18.2602	1
YDSTHGkFQGDVSVENGK	Sjc_0025800	8.34998e+06	34.58	0.0014456	3	2009.91	-3.75519	27.8556	1
TVDGPSSkLWR	Sjc_0025800	1.4312e+08	27.59	0.0205533	2	1287.66	-3.88621	32.8504	1
SSFLIPDLkDEDSK	Sjc_0026200	0	23.95	0.0475206	2	1635.81	-1.61691	20.3811	1
QPkVLENSEGSR	Sjc_0026230	1.36739e+06	32.87	0.00562894	2	1385.7	-3.82005	24.5575	1
VTSSISLkHEK	Sjc_0026360	1.43603e+07	57.89	1.57678e-05	2	1270.7	-3.22168	23.4436	1
kHAETELEETQSR	Sjc_0027340	1.39175e+06	55.68	2.16317e-05	2	1599.76	-3.6967	22.3734	1
ELFLPVYkQMLDAMYK	Sjc_0027600	3.18369e+07	63.4	5.66789e-06	2	2031.03	-0.926018	48.6272	1
DNHSAkYcDK	Sjc_0028170	847465	30.53	0.00175897	2	1279.53	-3.57156	19.5816	1
NLFSVAYkNVVGAR	Sjc_0030210	3.05207e+07	37.62	0.00166062	2	1579.86	-2.54211	41.3384	1
EVLTLLSkYLTPK	Sjc_0030210	5.72783e+07	15.52	0.0827603	2	1546.91	-0.881667	44.6195	1
SSDkPFcSSPEVTK	Sjc_0030250	2.4549e+06	52.1	2.83634e-05	2	1610.73	-3.63049	28.9561	1
INkYAYSGGGDTVAEHR	Sjc_0030360	1.34346e+07	89.07	1.25118e-08	2	1879.89	-4.42524	27.0579	1
EQNIkHSSENST	Sjc_0030630	6.55498e+06	33.26	0.00205347	2	1415.63	-4.01622	20.6925	1
qREQNIkHSSENST	Sjc_0030630	1.25834e+06	25.68	0.0128438	2	1682.77	-4.08761	22.6979	2
ALADHHVYLEGTLLkPNMVTAGQAcK	Sjc_0031630	5.53299e+07	37.49	0.00210321	3	2879.44	-4.72359	35.0059	1
FAkWR	Sjc_0031630	2.71092e+07	18.1	0.0596294	2	749.406	-4.48872	29.3167	1
TLHFVVSDVEPkYYADGEDAYAMR	Sjc_0031810	3.15287e+08	77.01	1.59254e-07	2	2818.3	-1.71486	38.6058	1
TLHFVVSDVEPkYYADGEDAYAmR	Sjc_0031810	1.05571e+08	46	0.000149457	3	2834.29	-2.43537	37.2357	1
KTLHFVVSDVEPkYYADGEDAYAMR	Sjc_0031810	1.22216e+07	26.34	0.0206724	3	2946.39	-4.13047	35.8895	2
FNkHVSSSR	Sjc_0032430	3.55071e+07	56.5	2.39543e-05	2	1103.55	-4.32724	20.3538	1
LLNQkLSSQLDFTHEK	Sjc_0033840	2.81538e+07	44.22	0.00042764	3	1943.02	-3.79409	34.738	1
SkFDGTTVYAQNK	Sjc_0034190	4.24419e+07	62.23	5.02666e-06	2	1500.73	-4.38477	30.1386	1
SkFDGTTVYAQNKR	Sjc_0034190	9.35118e+06	38.68	0.00151104	2	1656.83	-3.6309	26.9546	2
LSSkFDVR	Sjc_0035720	19843074	40.91	0.000997482	2	993.534	-2.32612	30.2346	1
SkHESSLTELQDK	Sjc_0035730	1.20983e+06	31.55	0.00640355	2	1543.75	-3.92843	24.7182	1
kYQSVTGGIQR	Sjc_0035730	7.57758e+06	27.64	0.0231591	2	1278.68	-3.92584	25.8679	1
EAESLLLAkNLNK	Sjc_0035970	19160112	57.83	1.40094e-05	2	1484.83	-3.53479	35.4742	1
LPEkDMR	Sjc_0036950	4.79103e+06	20.73	0.0528299	2	930.468	-3.43811	25.1914	1
DNSTPASNkHLDEQNPTGTNNSNNAR	Sjc_0037070	3.64907e+06	65.31	9.12771e-07	3	2838.26	-2.89761	24.8771	1
AIVkLVk	Sjc_0037600	3.4508e+07	24.06	0.0133499	2	854.579	9.66549	37.2711	1
kHIETEGK	Sjc_0041180	1.32361e+06	28	0.0117282	2	983.512	-3.91344	18.0862	1
FHDKPFNQGkIFK	Sjc_0042030	2.31392e+07	36.12	0.00312759	2	1647.86	-3.82226	28.0214	2
NGGNVEHcGTkHK	Sjc_0042580	1.00549e+07	38.68	0.000677595	2	1479.67	-4.01637	16.3267	1
HkHTEDPVETHTENGSTVDE	Sjc_0042580	3.82009e+07	38.31	0.000293264	3	2303.99	-5.52469	21.9293	1
RNckFNPK	Sjc_0043930	0	19.25	0.116473	2	1105.55	-4.3006	20.2399	2
VPHNAAVQIYDYkNK	Sjc_0044460	1.82425e+07	67.87	2.22912e-06	2	1801.92	-3.35445	30.073	1
VTEkYTEEEQLNK	Sjc_0044660	1.30192e+07	49.93	9.4003e-05	2	1652.8	-3.31575	27.9233	1
FYEQFSkNIK	Sjc_0044660	1.17225e+07	32.55	0.00553125	2	1345.67	-4.23213	33.063	1
RFDDASVQSDMkHWPFK	Sjc_0044680	1.0256e+08	44.23	0.000279403	3	2135.99	-3.50344	36.0788	2
GEEkSFFPEEISSMVLVAMK	Sjc_0044680	8.1018e+06	41.12	0.000904036	3	2300.12	-1.4171	49.3793	1
FDDASVQSDMkHWPFK	Sjc_0044680	72796927	35.41	0.00142431	2	1979.89	-3.10236	38.3392	1
IVVEYkGEEK	Sjc_0044680	5.04272e+06	28.45	0.0140746	2	1235.65	-3.60931	28.1326	1
ASPSVSkSGATVVVGGK	Sjc_0047310	7.95729e+06	28.49	0.0179098	2	1572.85	-4.07889	28.1285	1
FDEFEISGSkYAPEGIVYHHGR	Sjc_0047360	3.77018e+07	46.62	0.00014264	3	2580.2	-5.10101	35.2395	1
AMEkYK	Sjc_0051340	3.5084e+06	34.96	0.0020745	2	811.399	-3.66522	21.7773	1
AGKkPk	Sjc_0051340	1.36259e+07	21.58	0.0177231	2	712.432	-4.2162	18.1772	2
FcTSkYDVTVIDAPGHR	Sjc_0054280	3.54724e+07	66	2.04719e-06	2	2007.95	-4.05429	33.4705	1
YKEIIkEVSGYIK	Sjc_0054280	2.18681e+07	57.92	1.10584e-05	2	1611.89	-4.43507	35.2165	2
GSFkYAWVLDK	Sjc_0054280	12623819	48.79	0.000137415	2	1355.7	-2.21847	39.9325	1
YAWVLDkLK	Sjc_0054280	1.135e+07	38.24	0.00109477	2	1177.66	-2.33958	40.1772	1
STTTGHLIYkcGGIDKR	Sjc_0054280	2.00031e+07	20.25	0.107623	3	1948.98	-3.72119	25.5811	2
DQFDFkTR	Sjc_0055610	4.96267e+07	31.41	0.00415593	2	1098.52	-3.7457	33.3441	1
LRDQFDFkTR	Sjc_0055610	5.8753e+07	29.04	0.011663	3	1367.7	-3.64991	30.2362	2
akSSAKPR	Sjc_0055670	2.91657e+07	42.67	0.000602941	2	928.518	-3.87461	18.3644	2
AAGGkkHTK	Sjc_0058210	2.80085e+07	57.32	1.64964e-05	2	981.544	-4.10028	15.8372	2
akHHPDLIFcR	Sjc_0058950	2.89796e+07	42.68	0.000558393	3	1477.73	-2.55619	30.8848	1
MSNkDLK	Sjc_0060330	5.18996e+06	21.57	0.081157	2	877.438	-7.9476	23.0313	1
INVYYNEASGGkYVPR	Sjc_0060500;Sjc_0090690	2.1682e+07	83.33	5.45805e-08	2	1871.92	-3.28718	33.9437	1
YIHEAkSYK	Sjc_0061560	2.88338e+07	26.47	0.0264873	2	1180.59	-4.49634	21.5999	1
LGQkYIHEAK	Sjc_0061560	6260415	26.28	0.0222552	2	1228.66	-4.45593	23.5371	1
mmMTSGQAVkYK	Sjc_0062310	1.71839e+06	33.28	0.00216151	2	1448.65	-3.48631	24.6264	1
GkGGkSR	Sjc_0063110	1.17552e+08	30.3	0.0115724	2	773.423	-4.0662	17.5785	2
EIAQDFkTDLR	Sjc_0063120	2.04727e+07	56.57	2.95192e-05	2	1377.7	-3.25004	35.0006	1
QLATkAAR	Sjc_0063120	4.33995e+08	54.12	5.9444e-05	2	900.523	-3.54181	20.691	1
KQLATkAAR	Sjc_0063120	1.15676e+09	47.39	0.0002061	2	1028.62	-3.69343	19.13	2
kSTGGkAPR	Sjc_0063120	4.32584e+08	46.51	0.000212189	2	985.539	-4.00744	19.5685	2
kQLATkAAR	Sjc_0063120	9.32304e+09	38.54	0.00148356	2	1070.63	-3.15497	24.3129	2
qLATkAAR	Sjc_0063120	5.27488e+08	31.46	0.0044656	2	883.496	-3.7497	28.7915	1
kSAPATGGVK	Sjc_0063120	6.80755e+06	26.34	0.0299633	2	957.532	-4.97372	19.9722	1
kHNMMGDTDDEYYIIEK	Sjc_0063550	2.03543e+10	84.3	7.80224e-09	2	2143.92	-4.53934	35.3036	1
kHNmmGDTDDEYYIIEK	Sjc_0063550	6.47584e+09	77.3	3.70049e-08	3	2175.91	-4.29294	30.9894	1
kHNMmGDTDDEYYIIEK	Sjc_0063550	1.0037e+10	65.41	5.7182e-07	3	2159.92	-3.7684	31.4894	1
YPEIHkHR	Sjc_0063550	9.67568e+06	37.5	0.00195611	2	1121.58	-4.84928	21.1841	1
kHLLATSPK	Sjc_0063550	1.7449e+08	35.4	0.00118245	2	1036.61	-3.84598	21.8082	1
kHNASDSQIK	Sjc_0065150	263608	42.45	0.000463615	2	1169.59	-4.36332	17.3417	1
NTSkSSEVTENKT	Sjc_0066380	7.9082e+06	73.89	3.04198e-07	2	1466.69	-4.33421	21.1773	2
kHQPQSSAVDNNGPTR	Sjc_0066380	3.54006e+06	26.47	0.0206263	3	1777.85	-4.89027	19.6121	1
ADIGDLASkHK	Sjc_0067360	1.17037e+07	36.22	0.00235199	2	1196.62	-3.60016	26.3432	1
DVMSSkHMDSSSTLR	Sjc_0067960	1.83739e+06	72.78	2.60979e-07	2	1722.77	-4.61397	28.1759	1
DVmSSkHMDSSSTLR	Sjc_0067960	821157	49.76	3.59318e-05	2	1738.77	-3.54258	24.9515	1
AIEDRkLR	Sjc_0067960	6.99671e+06	22.77	0.0306498	2	1042.6	0.432934	38.8137	2
IcLTDHFkPLWSR	Sjc_0068070	1.16308e+07	26.93	0.025346	3	1714.87	-1.45521	37.7082	1
NAGkSADEMR	Sjc_0070960	6.71593e+06	47.72	5.32489e-05	2	1120.5	-4.17708	21.3931	1
SGkFIVPR	Sjc_0073010	1.09917e+07	22.79	0.0497086	2	945.547	-4.70471	30.4598	1
TQEEYAkLLAQR	Sjc_0074090	2.32912e+07	54.47	4.82318e-05	2	1491.77	-5.18026	34.5217	1
SSkFPYcDGAHNK	Sjc_0074810	5.40875e+06	35.73	0.000708347	2	1552.68	-5.16709	25.827	1
VGIVGkYGVR	Sjc_0075890	1.06497e+07	44.75	0.000231126	2	1089.64	-4.95606	31.4335	1
TKEALTk	Sjc_0076160	2.76721e+08	22.05	0.0801499	2	832.474	-4.29052	20.2051	1
DILMHYDEkNPLPK	Sjc_0076300	150444042	43.03	0.000572398	2	1754.87	-5.09782	34.6166	1
DILmHYDEkNPLPK	Sjc_0076300	3.18676e+07	22.86	0.0515019	2	1770.87	-3.90361	33.8881	1
YNLkQFQDIADSVK	Sjc_0076820	3.41084e+07	57.46	2.29726e-05	2	1710.87	-1.41982	39.5178	1
TQkWSDK	Sjc_0077480	0	24.16	0.0381789	2	934.457	-5.84429	23.6096	1
SkYHLQDVIIGK	Sjc_0077550	1.51429e+07	21.17	0.0710367	3	1442.8	-3.32132	32.4496	1
GIVHGVEkGILVR	Sjc_0078660	6.6614e+06	47.53	5.03321e-05	2	1418.84	-3.13982	31.1404	1
TPSAIKPkSSPK	Sjc_0078660	4.64112e+07	39.51	0.000615691	2	1282.73	-4.0659	20.131	2
sVPLAVPVkK	Sjc_0078660	89033276	31.11	0.00209105	2	1121.69	-4.36433	37.0112	1
RPTSGkYEDSQK	Sjc_0080660	980405	33.47	0.00398055	2	1437.69	-4.54972	18.5956	2
GkHFVEGGDFGNR	Sjc_0080800	5.30318e+06	38.63	0.000733422	3	1461.68	-2.53377	27.2941	1
SLHDALLVVkR	Sjc_0082530	6.51053e+07	58.6	4.96938e-06	2	1292.76	-4.30802	32.7448	1
DSIPPLIVFAkDGHYALSDLSK	Sjc_0084260	73788106	57.54	1.63864e-05	2	2428.28	1.19422	45.6929	1
LFHWDkPSDSWK	Sjc_0088510	1.00979e+08	35.13	0.00216366	2	1587.75	-3.86648	35.9847	1
GkYPAcGTK	Sjc_0089450	1.22175e+07	22.54	0.0387244	2	1023.49	-4.27888	21.5135	1
FIVkVLR	Sjc_0089770	3.16851e+06	22.86	0.0102863	2	916.598	-0.409729	38.5869	1
NERPSDHkHVSGSR	Sjc_0092760	939784	21.7	0.0588192	3	1647.79	-5.45436	17.2142	2
NLkNLANkR	Sjc_0093080	6.74166e+06	24.4	0.025597	2	1154.66	-4.52101	24.0325	2
SYSkHSR	Sjc_0094770	1.9774e+06	24.61	0.0294048	2	906.439	-4.26382	17.3698	1
GPNkHTLNQIK	Sjc_0095780	1.63251e+06	26.27	0.0200641	2	1291.71	-4.47167	22.9519	1
SSQSkFSSK	Sjc_0097940	0	24.38	0.020791	2	1027.5	-4.35244	21.4174	1
IQDkHQSmSQR	Sjc_0099640	272357	27.63	0.00966469	2	1415.66	-3.64846	17.5822	1
KFVDLPSk	Sjc_0104290	1.93681e+07	22.64	0.0577173	2	975.558	7.45095	29.0504	1
DNSGNNQDGPPTkFQR	Sjc_0111740	1.79251e+08	57.11	8.07324e-06	2	1816.81	-3.822	28.096	1
RDNSGNNQDGPPTkFQR	Sjc_0111740	2.22098e+07	38.9	0.000760067	2	1972.91	-4.03778	24.371	2
kGNTSTASkR	Sjc_0112250	4.36622e+06	56.83	2.58327e-05	2	1133.59	-4.07555	18.1855	2
LQQNkLLR	Sjc_0112250	3.05933e+08	34.69	0.00210568	2	1054.63	-3.7323	27.3072	1
qkQLQQR	Sjc_0112250	7.28971e+06	32.07	0.00493591	2	953.513	-3.70562	25.7887	1
DAFLkSHGVK	Sjc_0112430	9.88945e+06	46.49	0.000255803	2	1143.61	-4.66692	26.488	1
GAkTSNkHGK	Sjc_0114330	465452	36.16	0.00192472	2	1111.58	-4.16808	16.3032	2
GkGAkTSNK	Sjc_0114330	380690	25.71	0.039206	2	974.522	-5.11871	17.862	2
AkWTAWNGR	Sjc_0116460	7.05714e+07	25.53	0.0289695	2	1131.56	-4.70304	33.065	1
LINQTVFPVTYTEkFYSDVLK	Sjc_0120450	1.34816e+09	58.38	1.37225e-05	3	2547.33	-1.30461	45.8417	1
SkLMTYSGLFcVAVNPYKR	Sjc_0131210	0	50.13	0.000118887	2	2276.16	3.58156	46.0507	2
YGHYAkEcTESGGSGPQcYK	Sjc_0200160	4.23089e+07	50.94	1.60051e-05	3	2320.95	-3.89302	24.9366	1
IDQNcVVGLAYkLK	Sjc_0200380	4.79288e+07	35.18	0.00409575	3	1662.88	-5.7376	38.457	1
ALAQkYNcEK	Sjc_0200460	1.1837e+07	39.77	0.000838238	2	1266.61	-4.29475	24.4767	1
ALFEkLNMDLFLK	Sjc_0201800	8.24355e+06	54.61	2.854e-05	2	1623.88	-1.60877	46.4565	1
TSGTcAHkLFER	Sjc_0204960	1.1377e+07	61.05	6.63524e-06	2	1448.69	-3.54893	25.9632	1
NFQkILTK	Sjc_0205700	1.50845e+07	24.18	0.0213889	2	1033.6	-3.11399	30.6456	1
LcLTkQELYK	Sjc_0207310	2.28076e+07	34.09	0.00386043	2	1337.71	-4.3531	33.6058	1
QQGQALDkYAK	Sjc_0207460	1.55842e+07	32.15	0.00871638	2	1291.66	-3.139	26.1401	1
TkHNLFVSSTEDYHK	Sjc_0208180	1.03909e+07	20.96	0.072151	3	1847.89	-3.85863	26.568	1
IASTSSTSNSkFLDNDPK	Sjc_0208450	8.49356e+06	85.99	2.25332e-08	2	1953.93	-3.97543	29.5265	1
NIDkFVSEAADLAGDFGNAAR	Sjc_0208800	7.36728e+06	63.02	5.48773e-06	3	2223.06	-3.56612	47.1201	1
YAGkHFR	Sjc_0209670	5.72477e+07	39.73	0.00107478	2	920.47	-3.97293	21.4336	1
GkYDLDFK	Sjc_0209670	3.73331e+07	38.76	0.000665227	2	1027.51	-3.40364	34.5077	1
VQEMGYkSQR	Sjc_0210040	1.84058e+06	26.54	0.0192983	2	1267.61	-1.51188	24.8215	1
SGLIVSYHPPIFSSLkK	Sjc_0210250	38813607	21.32	0.0494396	2	1915.06	-4.29847	37.1076	1
SASSSTDkPR	Sjc_0211040	8.18126e+06	93.21	3.17557e-09	2	1077.51	-4.30392	18.4997	1
mESVAAHkDEVAPVESK	Sjc_0211620	2.25157e+07	61.37	7.00279e-06	2	1910.91	-3.43375	33.386	1
mESVAAHkDEVAPVESK	Sjc_0211620	2.20048e+07	48.07	0.000134901	2	1926.9	-4.50398	29.3128	1
mQETFHSENHDkHSSSR	Sjc_0211810	4.48995e+06	48.97	2.51918e-05	3	2156.89	-5.16078	20.2607	1
EHTDFkHR	Sjc_0211970	1.18191e+08	35.71	0.00142323	2	1111.52	-4.69052	19.0475	1
AkVIFVLGGPGSGK	Sjc_0212050	5.09756e+07	89.14	7.86248e-09	2	1371.79	-3.33638	36.7668	1
ALYkAmK	Sjc_0212110	2537824	23.3	0.0341447	2	882.472	-3.52951	22.6939	1
LATAkEmEPR	Sjc_0214960	2.63095e+06	36.93	0.00207837	2	1203.59	-7.76115	22.5837	1
AILkFPSLEAR	Sjc_0214960	9.62689e+07	21.28	0.0565996	2	1286.74	-3.14198	38.3847	1
HTEEMkWQAEK	Sjc_0216280	1.11765e+07	77.95	7.37493e-08	2	1458.66	-5.35307	25.6603	1
HTEEmkWQAEK	Sjc_0216280	2.47672e+06	55.16	1.14296e-05	2	1474.66	-4.41289	23.2716	1
SGkFMNPTDQAR	Sjc_0216870	3.34296e+07	53.2	3.58973e-05	2	1393.65	-4.077	28.9729	1
FTkYHDLSIEVNNMQFSTK	Sjc_0300270	2.13262e+07	22.43	0.0571479	3	2344.12	-2.41445	36.7155	1
AFNkVAGDDGEIDADELR	Sjc_0300430	7.79701e+06	51.2	4.47561e-05	2	1976.91	-4.31273	34.9555	1
RPLVMDkVAAAAEAAAR	Sjc_0301340	2.97977e+07	57.47	1.39667e-05	3	1781.97	-1.21897	38.2752	2
VNcGLIkMYK	Sjc_0303020	7.38692e+06	22.63	0.0545758	2	1267.65	-4.46608	33.0721	1
KAEPISWSkLEYcK	Sjc_0303290	4.9116e+07	78.95	1.64282e-07	2	1780.89	-4.75984	33.8445	2
HcFQkQLSTK	Sjc_0303480	2.77163e+07	58.04	1.57821e-05	2	1318.65	-4.5331	23.268	1
VkHNDSSDPETGKK	Sjc_0304610	962639	28.34	0.0123106	3	1583.76	-4.91388	16.6719	2
SETAAkHGEAQVK	Sjc_0304750	1.50517e+07	73.79	4.38722e-07	2	1397.7	-4.57329	18.277	1
LGDkWR	Sjc_0307260	6.584e+06	37.83	0.00150807	2	816.433	-4.16124	28.1992	1
kFAPLFDR	Sjc_0307410	3.99016e+07	41.97	0.000619448	2	1035.56	-3.12753	36.4108	1
IVHkQLEEEMK	Sjc_0308440	3.38861e+06	24.59	0.0366651	2	1425.75	6.55886	25.6252	1
VQkLLMDFFNGK	Sjc_0308630	14339433	43.66	0.000473579	2	1481.78	-2.323	43.2304	1
kHVcNDDGSVLVVSK	Sjc_0310070	1.27295e+07	46.82	0.000197571	3	1698.84	-4.36178	26.075	1
TPSAHPPYGDmIkK	Sjc_0000130	2.70928e+06	27.71	0.0158421	2	1599.78	-4.4284	24.5915	1
qAIAkYIK	Sjc_0000130	7.96551e+06	27.45	0.0173591	2	959.551	-4.83361	37.4348	1
SIYGNkFEDESFDNK	Sjc_0001030	9.19193e+06	45.4	0.000100941	2	1834.81	-4.07493	35.1873	1
RLEEEAIkYK	Sjc_0001510	1.05651e+07	29.2	0.0162907	2	1320.71	-3.77317	26.0314	2
LEEEAIkYK	Sjc_0001510	3.11661e+06	26.37	0.0274503	2	1164.61	-3.92516	28.2509	1
INFHFEkNEWFK	Sjc_0002330	7.9989e+06	23.19	0.046774	3	1680.81	-3.25423	38.1307	1
VEQkFNK	Sjc_0002330	2.15861e+06	21.9	0.0774785	2	934.493	-7.09899	22.4896	1
MSENPISNNVPVkFR	Sjc_0004470	5.36734e+07	64.48	4.43782e-06	2	1773.89	-4.407	35.0991	1
mSENPISNNVPVkFR	Sjc_0004470	3.13136e+07	23.84	0.0497722	2	1789.88	-3.77726	34.3565	1
IIGSkkDQYFLDK	Sjc_0007580	2.70307e+07	44.49	0.000412532	2	1638.86	-5.57683	35.5059	2
TDQDISSkHIEEHSK	Sjc_0008400	2.3279e+07	37.86	0.0012358	3	1795.84	-4.02106	22.2439	1
EYYYQPPTLTcLTPkFcTIYR	Sjc_0009730	1.08031e+08	40.41	0.000846219	2	2756.3	-2.14839	43.0466	1
MkQQQkQQR	Sjc_0009730	3.52424e+06	39.54	0.00121735	2	1286.66	-3.74176	18.2079	2
mkQQQkQQR	Sjc_0009730	758719	34.68	0.00405086	2	1302.65	-4.4777	17.7729	2
TSEAPSSTGkSGK	Sjc_0010800	1.16873e+06	57.36	1.57942e-05	2	1278.61	-4.50372	18.2499	1
YkSNENPWFFHK	Sjc_0011460	2.21163e+07	36.58	0.00158246	3	1638.76	-3.05629	34.0195	1
RVELAEAVkHK	Sjc_0012620	2.77713e+07	43.41	0.000273622	3	1321.75	-4.24427	22.9816	2
VLTTTTDkHR	Sjc_0013140	909431	30.25	0.00844934	2	1213.65	-4.18672	19.7663	1
LGLIPLAVDPkYFLFPTR	Sjc_0014050	4.32693e+06	27.4	0.00482221	3	2102.2	-2.88727	50.2048	1
HTLHkVTQYK	Sjc_0015000	3.16736e+06	34.16	0.00362603	2	1296.7	-4.46939	19.8681	1
ASkVkLPK	Sjc_0016080	120792397	51.53	1.79283e-05	2	954.595	-3.94019	26.2878	2
AVTkYSGSK	Sjc_0016080	2.27816e+07	49.22	7.83865e-05	2	982.516	-4.2069	20.565	1
LLLPGELAkHAVSEGTK	Sjc_0016080;Sjc_0036400	1.77025e+08	91.63	5.18737e-09	2	1805.01	-4.55609	35.4304	1
GVLkVFLENVIR	Sjc_0016100	1.30435e+07	76.84	9.21213e-08	2	1428.86	-1.565	46.8988	1
GkGGkGLGK	Sjc_0016100	7.32856e+07	53.55	5.4534e-05	2	885.512	-3.99199	21.1572	2
GLGkGGAkR	Sjc_0016100	1.08172e+09	43.52	0.000297903	2	927.534	-3.69079	22.1654	2
GGkGLGkGGAK	Sjc_0016100	1.10057e+08	36.29	0.00200894	2	1013.57	-4.74851	22.3726	2
YVIHcPDKEAMTSkHLER	Sjc_0019830	5.62252e+06	22.58	0.0618327	3	2256.08	-5.27958	26.4108	2
VVGkSQSSmK	Sjc_0025560	1.10009e+07	55.9	2.72462e-05	2	1108.56	-5.43476	18.0451	1
VVGkSQSSMK	Sjc_0025560	9.38111e+06	43.74	0.000439575	2	1092.57	-3.35308	20.5991	1
TVDGPSSkLWR	Sjc_0025800	9.82843e+07	21.35	0.0795115	2	1287.66	-3.60181	32.7042	1
VTSSISLkHEK	Sjc_0026360	1.26271e+07	47.49	0.000188041	2	1270.69	-5.33514	23.1222	1
NLFSVAYkNVVGAR	Sjc_0030210	1.81854e+07	64.7	3.2529e-06	2	1579.86	-2.38757	41.2228	1
INkYAYSGGGDTVAEHR	Sjc_0030360	4.88978e+06	21.73	0.0631143	3	1879.88	-6.47785	26.9974	1
EQNIkHSSENST	Sjc_0030630	4091667	22.84	0.0228798	2	1415.64	-2.98146	20.4859	1
ALADHHVYLEGTLLkPNmVTAGQAcK	Sjc_0031630	3.39863e+07	38.91	0.00147165	4	2895.44	-4.52691	33.552	1
ALADHHVYLEGTLLkPNMVTAGQAcK	Sjc_0031630	1.61553e+07	21.01	0.0903452	4	2879.45	-2.75694	34.8237	1
FAkWR	Sjc_0031630	5.56951e+06	19.53	0.0429003	2	749.406	-4.48872	29.1848	1
TLHFVVSDVEPkYYADGEDAYAMR	Sjc_0031810	8.40041e+07	79.16	8.55439e-08	3	2818.29	-4.81656	38.0252	1
TLHFVVSDVEPkYYADGEDAYAmR	Sjc_0031810	3.07238e+07	30.15	0.00540988	3	2834.28	-5.34255	37.0288	1
FNkHVSSSR	Sjc_0032430	4.88025e+07	44.99	0.000312202	2	1103.56	-2.22554	20.0031	1
kYVIHIER	Sjc_0032430	2.43851e+06	26.28	0.0197824	3	1099.62	-3.02292	27.4564	1
LLNQkLSSQLDFTHEK	Sjc_0033840	2.02465e+07	23.5	0.0491352	3	1943.02	-3.22866	34.5527	1
SkFDGTTVYAQNK	Sjc_0034190	2.12265e+07	76.38	2.02527e-07	2	1500.73	-4.62879	29.8916	1
VSLWkTSK	Sjc_0035950	35232229	29.15	0.0128308	2	990.554	-7.84566	19.2292	1
EAESLLLAkNLNK	Sjc_0035970	8.45295e+06	29.03	0.0106272	2	1484.83	-3.69921	35.2671	1
DNSTPASNkHLDEQNPTGTNNSNNAR	Sjc_0037070	2.79602e+06	29.77	0.00337404	3	2838.26	-2.05894	24.7747	1
AIVkLVk	Sjc_0037600	2.97595e+07	30.52	0.00301633	2	854.579	9.23697	37.0883	1
FHDKPFNQGkIFK	Sjc_0042030	2.083e+07	41.74	0.000884248	2	1647.86	-4.26673	28.0431	2
NGGNVEHcGTkHK	Sjc_0042580	1.10737e+06	40.81	0.000414925	2	1479.67	-4.01637	15.7359	1
HkHTEDPVETHTENGSTVDE	Sjc_0042580	2.92405e+07	34.58	0.00083601	3	2303.99	-2.74312	22.358	1
FDDASVQSDMkHWPFK	Sjc_0044680	4.37228e+07	51.98	3.07427e-05	2	1979.89	-4.08885	37.8923	1
RFDDASVQSDmkHWPFK	Sjc_0044680	2.28954e+07	21.65	0.0362473	3	2151.98	-3.44017	32.6454	2
FDDASVQSDmKHWPFk	Sjc_0044680	1.21889e+07	15.77	0.095346	3	1995.88	-4.60371	34.6969	1
TmLkR	Sjc_0046600	0	22.48	0.0751366	2	706.386	-8.13924	26.1859	1
kHLEDEHER	Sjc_0050230	6.45076e+06	40.71	0.000441574	3	1234.58	-4.11709	17.8621	1
AkYESLAQVEK	Sjc_0051340	1.34892e+07	55.18	3.8227e-05	2	1307.68	-4.63273	29.7392	1
HTELLHDQVEIPHkK	Sjc_0052890	4.00126e+07	25.07	0.0314283	3	1865.98	-4.07513	26.3231	1
YKEIIkEVSGYIK	Sjc_0054280	1.33142e+07	43.94	0.000276497	2	1611.89	-4.28361	34.9549	2
NVSVkDIR	Sjc_0054280	2.40583e+06	25.37	0.0471904	2	972.542	-5.551	27.5337	1
IPLQDVYkIGGIGTVPVGR	Sjc_0054280	5.78804e+07	19.31	0.0504044	3	2024.15	-3.05612	40.3897	1
DQFDFkTR	Sjc_0055610	1.78071e+07	40.71	0.000530738	2	1098.52	-3.96795	33.258	1
LRDQFDFkTR	Sjc_0055610	3.18727e+07	35.91	0.00243626	2	1367.7	-4.71111	29.9904	2
akSSAKPR	Sjc_0055670	1.69919e+07	45.95	0.000283318	2	928.517	-4.46622	18.1578	2
AAGGkkHTK	Sjc_0058210	4.10152e+06	52.16	5.38199e-05	2	981.544	-3.22971	15.708	2
SYWGAGkHR	Sjc_0058270	1.03342e+07	24.93	0.0210495	2	1103.53	-4.09536	23.8724	1
akHHPDLIFcR	Sjc_0058950	2.63194e+07	37.92	0.00165472	3	1477.73	-2.43228	30.7792	1
GkGGkSR	Sjc_0063110	1.8051e+07	24.92	0.0399413	2	773.424	-3.82945	17.1726	2
kSTGGkAPR	Sjc_0063120	5.13209e+08	55	3.09903e-05	2	985.538	-4.56481	18.4632	2
KQLATkAAR	Sjc_0063120	9.83935e+08	47.75	0.000189705	2	1028.62	-4.04946	17.8957	2
kQLATkAAR	Sjc_0063120	8.55939e+09	35.41	0.00307882	2	1070.63	-3.04095	24.2878	2
QLATkAAR	Sjc_0063120	1.23606e+06	28.48	0.0217825	2	900.522	-4.42292	21.1969	1
EIAQDFkTDLR	Sjc_0063120	7.24367e+06	27.63	0.0222633	2	1377.69	-4.40191	34.8697	1
qLATkAAR	Sjc_0063120	4.23433e+08	23.1	0.0306112	2	883.497	-3.12794	29.3168	1
kHNMMGDTDDEYYIIEK	Sjc_0063550	1.73304e+10	85.39	6.21496e-09	2	2143.92	-3.85608	34.5166	1
kHNmmGDTDDEYYIIEK	Sjc_0063550	6.3146e+09	64.39	6.64387e-07	3	2175.91	-4.04048	30.331	1
kHNmMGDTDDEYYIIEK	Sjc_0063550	9.92361e+09	60.74	1.53965e-06	3	2159.92	-3.4293	31.9271	1
kHLLATSPK	Sjc_0063550	2.18267e+08	39.32	0.000485342	2	1036.61	-3.96374	22.2688	1
YPEIHkHR	Sjc_0063550	3.73928e+06	38.61	0.00130835	2	1121.58	-3.54322	20.8666	1
FLITkK	Sjc_0065020	6072247	21.3	0.0135338	2	791.5	-3.74725	35.0921	1
NISkISEIVQNVMVPAFVPR	Sjc_0065510	4.22231e+06	41.18	0.000468679	3	2283.24	-7.87731	48.3179	1
NTSkSSEVTENKT	Sjc_0066380	5.41416e+06	62.74	4.17705e-06	2	1466.69	-3.58515	20.9179	2
ADIGDLASkHK	Sjc_0067360	9.51332e+06	38.09	0.00145924	2	1196.62	-3.9062	26.3575	1
NAGkSADEMR	Sjc_0070960	3.97529e+06	17.37	0.0549694	2	1120.5	-4.28602	21.617	1
SSkFPYcDGAHNK	Sjc_0074810	3363866	20.69	0.0213275	2	1552.68	-4.69537	25.8518	1
VGIVGkYGVR	Sjc_0075890	7.09169e+06	54.02	2.39748e-05	2	1089.64	-3.83577	31.3576	1
DILMHYDEkNPLPK	Sjc_0076300	6.41139e+07	41.15	0.000847934	2	1754.87	-4.0544	34.5492	1
LLQETPkEVPWLcK	Sjc_0076480	1.95895e+07	49.26	0.000135178	2	1782.94	-3.82278	38.2906	1
YNLkQFQDIADSVK	Sjc_0076820	3.11326e+07	82.7	6.55179e-08	2	1710.86	-3.84573	39.2527	1
sVPLAVPVkK	Sjc_0078660	7.19229e+07	40.43	0.000244548	2	1121.69	-3.49371	36.9253	1
TPSAIKPkSSPK	Sjc_0078660	5.68631e+07	33	0.00260617	2	1282.73	-4.63689	20.2481	2
SVPLAVPVkK	Sjc_0078660	4.81645e+06	18.37	0.0265718	2	1079.68	-5.26357	30.2034	1
PILETTkSmPQNSK	Sjc_0080290	1.17605e+06	35.68	0.00309603	2	1631.83	-2.23871	16.0926	1
GkHFVEGGDFGNR	Sjc_0080800	2.04691e+06	25.04	0.0170764	3	1461.68	-3.84912	27.2858	1
SLHDALLVVkR	Sjc_0082530	4.58905e+07	50.25	3.1154e-05	2	1292.76	-3.74146	32.5535	1
LFHWDkPSDSWK	Sjc_0088510	3.34953e+07	22.26	0.0418976	3	1587.75	-3.56742	35.7259	1
aDAIkVLEDIDGFDK	Sjc_0091280	4.12938e+06	56.98	2.45548e-05	2	1732.86	-4.23246	53.2591	1
SYSkHSR	Sjc_0094770	733371	31.68	0.00577323	2	906.439	-4.26382	16.1855	1
SSQSkFSSK	Sjc_0097940	514504	25.26	0.018169	2	1027.5	-2.808	21.1988	1
DNSGNNQDGPPTkFQR	Sjc_0111740	1.01988e+08	45.14	0.00012401	2	1816.81	-4.22513	28.1238	1
kGNTSTASkR	Sjc_0112250	4.16201e+06	59.53	1.3873e-05	2	1133.59	-3.86018	17.9359	2
LQQNkLLR	Sjc_0112250	2.21342e+08	40.77	0.000519268	2	1054.63	-4.19528	27.336	1
qkQLQQR	Sjc_0112250	5.84815e+06	33.11	0.00388479	2	953.512	-4.40974	25.7439	1
AkWTAWNGR	Sjc_0116460	1.88364e+07	22.98	0.0498466	2	1131.57	-3.51638	32.9696	1
LINQTVFPVTYTEkFYSDVLK	Sjc_0120450	8.2369e+08	48.02	0.000146718	3	2547.33	-2.16719	45.7017	1
kmSkPTSSK	Sjc_0133500	1.26792e+07	22.5	0.0598894	2	1135.57	5.31361	19.4261	2
YGHYAkEcTESGGSGPQcYK	Sjc_0200160	2.58826e+07	54.93	5.86707e-06	3	2320.95	-4.91863	24.7333	1
IDQNcVVGLAYkLK	Sjc_0200380	34852434	41.69	0.000918204	2	1662.88	-4.29803	37.9868	1
ALAQkYNcEK	Sjc_0200460	5.72418e+06	44.54	0.000277733	2	1266.61	-4.68026	24.4785	1
TSGTcAHkLFER	Sjc_0204960	7.73806e+06	67.16	1.62501e-06	2	1448.69	-3.46466	25.9821	1
IASTSSTSNSkFLDNDPK	Sjc_0208450	4.53415e+06	77.72	1.66508e-07	2	1953.93	-3.03832	29.2654	1
YAGkHFR	Sjc_0209670	7.53707e+07	39.58	0.0012172	2	920.471	-3.50877	21.2467	1
GkYDLDFK	Sjc_0209670	5886211	27.75	0.0103246	2	1027.51	-2.80962	34.3304	1
VQEmGYkSQR	Sjc_0210040	921107	31.96	0.00397997	2	1283.6	-3.33263	21.9437	1
SGLIVSYHPPIFSSLkK	Sjc_0210250	2.40118e+07	22.07	0.0391147	3	1915.06	-3.19	36.9235	1
mESVAAHkDEVAPVESK	Sjc_0211620	1.33261e+07	60.86	7.13706e-06	2	1926.9	-5.70765	29.0171	1
mESVAAHkDEVAPVESK	Sjc_0211620	1.08276e+07	60.15	8.93597e-06	2	1910.91	-3.88092	33.4147	1
mQETFHSENHDkHSSSR	Sjc_0211810	2.67599e+06	38.52	0.000256697	3	2156.9	-3.88738	20.0431	1
EHTDFkHR	Sjc_0211970	6.94464e+07	46.4	0.000121416	2	1111.52	-4.69052	18.231	1
AkVIFVLGGPGSGK	Sjc_0212050	2.53699e+07	44.37	0.000235809	2	1371.79	-4.22624	36.6744	1
AILkFPSLEAR	Sjc_0214960	8.71271e+07	30.17	0.00740441	2	1286.74	-4.2804	38.0514	1
HTEEMkWQAEK	Sjc_0216280	4.36268e+06	39.2	0.00058911	2	1458.66	-4.43251	25.6766	1
KLIVVPkSVTFK	Sjc_0217190	6.44158e+06	26.84	0.00377938	2	1400.88	-3.30801	32.4829	2
GSADkFLHSTPVAK	Sjc_0217610	1.52047e+07	36.97	0.00214973	2	1499.78	-4.64628	28.7633	1
RPLVMDkVAAAAEAAAR	Sjc_0301340	3.03724e+07	46.14	0.000205521	3	1781.96	-3.27407	37.8609	2
KAEPISWSkLEYcK	Sjc_0303290	2.74213e+07	49.94	0.000123697	2	1780.89	-4.00584	33.7508	2
TQGAIkYTR	Sjc_0303480	6.66892e+06	29.39	0.0120834	2	1079.58	-3.52201	23.936	1
VkHNDSSDPETGKK	Sjc_0304610	498612	20.54	0.0741787	3	1583.76	-5.26073	15.8408	2
SETAAkHGEAQVK	Sjc_0304750	1.14023e+07	71.48	7.39662e-07	2	1397.7	-4.31127	18.0563	1
VFGkTYTTPR	Sjc_0304980	2.69361e+07	42.84	0.000499196	2	1211.64	-3.86392	29.1777	1
IASkYQSSK	Sjc_0305980	3.81414e+06	31.45	0.00555011	2	1053.55	-3.80797	20.7072	1
LGDkWR	Sjc_0307260	1.80617e+06	36.36	0.00211554	2	816.433	-4.46027	28.2099	1
kFAPLFDR	Sjc_0307410	2.25272e+07	34.16	0.00408648	2	1035.56	-2.42025	36.2657	1
kHVcNDDGSVLVVSK	Sjc_0310070	1.01289e+07	73.49	4.40998e-07	2	1698.84	-3.63532	26.1534	1

## Sheet: 18dpi-male
Supplementary Table S1. Identified Peptides and Proteins from 18dpi male worms. The table indicates the name of the identified protein, the sequence of the observed peptide, number of miscleavages and the charge states that were observed.
Sequence	Protein Accessions	Area	IonScore	Exp Value	Charge	MH+ [Da]	ΔM [ppm]	RT [min]	# Missed Cleavages
MSENPISNNVPVkFR	Sjc_0004470	1.01976e+08	47.62	0.000229201	2	1773.89	-2.96188	35.2361	1
mSENPISNNVPVkFR	Sjc_0004470	29295060	41.04	0.000995613	2	1789.88	-3.23165	34.7108	1
AkLLVLR	Sjc_0006130	1.4172e+07	23.98	0.00739898	2	854.58	-2.55285	37.1354	1
IIGSkkDQYFLDK	Sjc_0007580	3.34081e+07	29.37	0.0120236	2	1638.87	-3.71471	35.5862	2
mkQQQkQQR	Sjc_0009730	741202	40.64	0.00100106	2	1302.65	-3.82173	17.8135	2
GAFLEkAR	Sjc_0009730	1.33465e+06	24.65	0.0421604	2	933.519	4.26062	17.8514	1
MkQQQkQQR	Sjc_0009730	1.57463e+06	23.84	0.0452287	2	1286.66	-3.55201	18.6373	2
EYYYQPPTLTcLTPkFcTIYR	Sjc_0009730	1.05855e+08	20.28	0.083443	2	2756.3	-3.38845	42.8574	1
YkSNENPWFFHK	Sjc_0011460	3.77916e+07	18.46	0.0905261	3	1638.76	-4.50883	34.1516	1
LLLPGELAkHAVSEGTK	Sjc_0016080	8.35989e+07	72.86	3.51973e-07	2	1805.01	-3.94743	35.4804	1
ASkVkLPK	Sjc_0016080	6.46063e+07	35.05	0.00079715	2	954.594	-4.38776	25.9959	2
VVSGkAAkK	Sjc_0016080	1.74536e+07	30.96	0.0084577	2	971.584	-4.49605	20.0091	2
AVTkYSGSK	Sjc_0016080	1.03147e+07	22.46	0.0357553	2	982.515	-5.94631	20.8848	1
GVLkVFLENVIR	Sjc_0016100	11246172	67.24	8.02396e-07	2	1428.85	-2.93192	46.9807	1
GLGkGGAkR	Sjc_0016100	7.51431e+08	36.07	0.00165606	2	927.534	-3.55918	21.5764	2
HIPkLK	Sjc_0022470	44477831	30.18	0.00417339	2	777.494	-4.72402	24.5094	1
VVGkSQSSmK	Sjc_0025560	5.47355e+06	35.01	0.00336008	2	1108.56	-4.66394	18.4053	1
kHAETELEETQSR	Sjc_0027340	3338068	63.77	3.25313e-06	2	1599.76	-3.39148	22.1819	1
EQNIkHSSENST	Sjc_0030630	2.08125e+06	40.91	0.000373042	2	1415.63	-5.99953	20.6932	1
ALADHHVYLEGTLLkPNMVTAGQAcK	Sjc_0031630	3.77175e+07	27.13	0.0223657	3	2879.44	-5.23231	35.0366	1
TLHFVVSDVEPkYYADGEDAYAMR	Sjc_0031810	2.08307e+08	69.4	8.15189e-07	3	2818.29	-2.86745	38.2034	1
TLHFVVSDVEPkYYADGEDAYAmR	Sjc_0031810	33803638	24.69	0.0193586	3	2834.29	-3.72745	37.1317	1
FNkHVSSSR	Sjc_0032430	3.03332e+06	33.32	0.00491193	2	1103.55	-5.21217	20.2876	1
SkFDGTTVYAQNK	Sjc_0034190	2.46121e+07	49.97	8.45823e-05	2	1500.73	-4.46611	29.5877	1
SkFDGTTVYAQNKR	Sjc_0034190	6.08478e+06	33.96	0.00437952	2	1656.83	-4.5887	26.8245	2
FHDKPFNQGkIFK	Sjc_0042030	3.05186e+07	45.18	0.00039744	2	1647.86	-4.19265	27.7972	2
HkHTEDPVETHTENGSTVDE	Sjc_0042580	9.05254e+06	26.9	0.00408348	3	2303.99	-5.36575	21.66	1
FDDASVQSDMkHWPFK	Sjc_0044680	33348094	47.29	9.3319e-05	2	1979.89	-2.79409	37.9859	1
RFDDASVQSDMkHWPFK	Sjc_0044680	117776414	33.39	0.00327571	3	2135.99	-3.67488	35.7813	2
FDEFEISGSkYAPEGIVYHHGR	Sjc_0047360	26480121	29.09	0.00906332	3	2580.21	-1.97852	35.1369	1
kHLEDEHER	Sjc_0050230	3.18962e+06	47.34	0.000111623	2	1234.58	-3.9826	18.0338	1
akSSAKPR	Sjc_0055670	5.33073e+06	39.06	0.00141548	2	928.516	-5.51797	18.5799	2
AAGGkkHTK	Sjc_0058210	1.97955e+07	52.08	5.48205e-05	2	981.544	-3.60281	15.7068	2
YIHEAkSYK	Sjc_0061560	13528922	23.55	0.0518845	2	1180.59	-4.59973	21.394	1
sLSkYLAPPLTSLPLcLPR	Sjc_0061600	1.21199e+07	22.35	0.0346351	3	2210.21	-5.04827	50.6199	1
GkGGkSR	Sjc_0063110	30405336	30.79	0.0103376	2	773.424	-3.51379	17.7023	2
GKGGkSR	Sjc_0063110	0	25.67	0.0360455	2	731.413	-3.62407	14.1454	2
kSTGGkAPR	Sjc_0063120	381304507	45.22	0.000294595	2	985.538	-4.50288	18.878	2
kQLATkAAR	Sjc_0063120	8754156815	43.85	0.000430642	2	1070.63	-3.9531	23.1899	2
QLATkAAR	Sjc_0063120	1.08185e+08	42.3	0.000903875	2	900.522	-4.82959	20.7096	1
KQLATkAAR	Sjc_0063120	9.49662e+08	41.36	0.000826187	2	1028.62	-4.40548	18.1401	2
qLATkAAR	Sjc_0063120	186952572	30.8	0.00519852	2	883.496	-4.30237	28.7441	1
kHNMMGDTDDEYYIIEK	Sjc_0063550	39567991382	90.24	1.9871e-09	2	2143.92	-3.40058	34.4627	1
kHNmmGDTDDEYYIIEK	Sjc_0063550	5296953321	74.1	6.59034e-08	3	2175.91	-4.54539	29.816	1
kHNMmGDTDDEYYIIEK	Sjc_0063550	14731257961	68.45	2.42051e-07	2	2159.92	-3.95998	33.5253	1
kHLLATSPK	Sjc_0063550	2.19742e+08	42.43	0.000237164	2	1036.61	-4.19926	21.5749	1
YPEIHkHR	Sjc_0063550	6.72207e+06	28.7	0.0128151	2	1121.58	-3.43439	21.2199	1
DILMHYDEkNPLPK	Sjc_0076300	1.09176e+08	47.61	0.000190718	2	1754.87	-3.77616	34.7634	1
LLQETPkEVPWLcK	Sjc_0076480	3.41238e+07	36.3	0.00277791	2	1782.94	-3.68585	38.3586	1
YNLkQFQDIADSVK	Sjc_0076820	32619705	85.93	3.20364e-08	2	1710.86	-4.98734	39.2632	1
sVPLAVPVkK	Sjc_0078660	6.98247e+07	41.65	0.000184656	2	1121.69	-3.27606	36.9595	1
TPSAIKPkSSPK	Sjc_0078660	1.20747e+07	39.28	0.000649176	2	1282.73	-4.25623	20.1599	2
SLHDALLVVkR	Sjc_0082530	45670958	30.31	0.00335199	3	1292.76	-3.84629	32.6347	1
LFHWDkPSDSWK	Sjc_0088510	4.84028e+07	31.75	0.00471182	2	1587.75	-3.94336	35.7519	1
DNSGNNQDGPPTkFQR	Sjc_0111740	5.77806e+07	43.73	0.000171575	2	1816.81	-4.49389	28.0936	1
kGNTSTASkR	Sjc_0112250	2.47583e+06	55.25	3.7168e-05	2	1133.59	-4.39861	18.2518	2
KSSNkSLDSIR	Sjc_0120320	1.10343e+09	22.03	0.0701808	2	1276.69	6.01445	26.0043	2
LINQTVFPVTYTEkFYSDVLK	Sjc_0120450	8.90965e+08	53.21	4.39327e-05	3	2547.33	-2.38283	45.6953	1
ELADFDSkNVIWVEDEKDGYVLANIK	Sjc_0134610	1.762e+08	53.87	4.38918e-05	3	3052.5	-3.58124	42.0238	2
ALLkELADFDSK	Sjc_0134610	1.21568e+07	51.9	8.68405e-05	2	1391.74	-4.73602	39.6904	1
YGHYAkEcTESGGSGPQcYK	Sjc_0200160	3.2379e+07	60.8	1.40899e-06	3	2320.95	-4.99752	24.7567	1
IDQNcVVGLAYkLK	Sjc_0200380	1.35266e+08	46.65	0.000303862	3	1662.88	-2.76453	38.1453	1
sSFLGkWK	Sjc_0200770	9.06589e+06	32.78	0.00495596	2	1036.54	-2.64984	43.1141	1
NIDkFVSEAADLAGDFGNAAR	Sjc_0208800	5.29476e+06	38.68	0.00148393	3	2223.06	-2.57772	47.0291	1
AkVIFVLGGPGSGK	Sjc_0212050	41084492	65.73	1.72409e-06	2	1371.79	-3.87029	36.702	1
AILkFPSLEAR	Sjc_0214960	5.62694e+07	31.77	0.00505608	2	1286.74	-2.95224	38.2104	1
GSADkFLHSTPVAK	Sjc_0217610	2.2195e+07	48.19	0.000153222	2	1499.78	-5.5416	28.6955	1
HcFQkQLSTK	Sjc_0303480	1.78934e+07	47.59	0.000175922	2	1318.65	-4.44053	23.0411	1
VkHNDSSDPETGKK	Sjc_0304610	932025	20.25	0.0830774	4	1583.76	-4.42137	16.5999	2
SETAAkHGEAQVK	Sjc_0304750	9.39302e+06	73.53	4.16992e-07	2	1397.69	-5.27198	18.4444	1
MYGALQGLNkSETAAK	Sjc_0304750	2.72186e+07	47.95	0.000203612	2	1723.86	-6.42681	32.7449	1
VQkLLMDFFNGK	Sjc_0308630	2.10186e+07	37.81	0.00185446	2	1481.78	-3.6411	42.9692	1
MSENPISNNVPVkFR	Sjc_0004470	6.88298e+07	54.01	5.04433e-05	2	1773.89	-3.9253	35.3404	1
mkQQQkQQR	Sjc_0009730	1.01184e+06	36.51	0.00244576	2	1302.65	-4.10286	17.7546	2
EYYYQPPTLTcLTPkFcTIYR	Sjc_0009730	7.72627e+07	20.75	0.0782497	3	2756.3	-2.35257	43.1353	1
FFkGGQYAQAISLYDEGLKK	Sjc_0013160	4.89652e+07	20.74	0.102465	3	2305.18	-4.16642	37.7164	2
HTLHkVTQYK	Sjc_0015000	2.01832e+06	23.39	0.0442107	2	1296.7	-6.25805	20.1848	1
LLLPGELAkHAVSEGTK	Sjc_0016080	6.83426e+07	79.74	7.96272e-08	2	1805.01	-4.21794	35.5417	1
VVSGkAAkK	Sjc_0016080	1.99545e+07	67.75	1.48574e-06	2	971.584	-4.18195	19.9638	2
ASkVkLPK	Sjc_0016080	52744587	36.66	0.000550225	2	954.594	-4.64351	26.0857	2
GVLkVFLENVIR	Sjc_0016100	1.10768e+07	57.36	8.1726e-06	2	1428.86	-1.47957	47.0107	1
GLGkGGAkR	Sjc_0016100	777209940	34.51	0.00237178	2	927.534	-3.49338	21.8459	2
VVGkSQSSmK	Sjc_0025560	6.81081e+06	38.86	0.00139118	2	1108.56	-4.11336	18.2523	1
VVGkSQSSMK	Sjc_0025560	1.20929e+07	38.08	0.0018905	2	1092.57	-4.13518	20.9121	1
TVDGPSSkLWR	Sjc_0025800	1.33977e+08	35.65	0.00296774	2	1287.66	-4.92901	33.1014	1
NLFSVAYkNVVGAR	Sjc_0030210	21787297	31.12	0.00722456	2	1579.85	-3.31478	41.2579	1
ALADHHVYLEGTLLkPNmVTAGQAcK	Sjc_0031630	3.48526e+07	27.62	0.019028	3	2895.44	-3.91095	33.5815	1
TLHFVVSDVEPkYYADGEDAYAMR	Sjc_0031810	130060642	63.59	3.10641e-06	3	2818.29	-3.38721	38.2077	1
FNkHVSSSR	Sjc_0032430	3.8527e+06	32.57	0.00550583	2	1103.56	-3.77416	20.4186	1
FHDKPFNQGkIFK	Sjc_0042030	2.6194e+07	31.17	0.00962433	2	1647.86	-4.85936	27.945	2
NGGNVEHcGTkHK	Sjc_0042580	1.21969e+06	46.18	0.000120495	2	1479.67	-4.01637	16.0769	1
FDDASVQSDMkHWPFK	Sjc_0044680	5.2013e+07	40.04	0.000465691	2	1979.89	-3.5956	38.1111	1
RFDDASVQSDMkHWPFK	Sjc_0044680	95826339	39.45	0.000805858	3	2135.99	-4.36068	35.775	2
TmLkR	Sjc_0046600	6.96109e+08	30.22	0.012643	2	706.386	-7.36159	25.6586	1
sSHDSDHHkHPHEEHEHATDGHHQAEHcGK	Sjc_0047340	2.52037e+06	26.02	0.00516345	4	3594.46	-2.82614	17.4593	1
kHLEDEHER	Sjc_0050230	2.9903e+06	37.19	0.00115546	2	1234.58	-3.78485	17.8872	1
YKEIIkEVSGYIK	Sjc_0054280	1.40669e+07	31.2	0.00519626	2	1611.89	-3.82922	35.2598	2
IPLQDVYkIGGIGTVPVGR	Sjc_0054280	52204211	23.19	0.0208684	3	2024.15	-2.51335	40.497	1
kYADSQAELENAQR	Sjc_0054830	9213086	59.55	7.98606e-06	2	1664.78	-4.02875	27.1557	1
VkVGTEFVTK	Sjc_0054830	4.4716e+07	28.46	0.0110485	2	1149.65	-2.58444	29.6705	1
akSSAKPR	Sjc_0055670	6.85144e+06	42.68	0.000601554	2	928.517	-4.46622	18.45	2
AAGGkkHTK	Sjc_0058210	3.86088e+07	51.78	5.87413e-05	2	981.544	-3.66499	15.8548	2
YIHEAkSYK	Sjc_0061560	2.33932e+07	30.37	0.0106527	2	1180.6	-2.53178	21.6889	1
GkGGkSR	Sjc_0063110	6.08506e+07	22.81	0.0649265	2	773.423	-3.98728	17.6336	2
kQLATkAAR	Sjc_0063120	8.44574e+09	45.62	0.000286495	2	1070.63	-3.72506	23.1946	2
KQLATkAAR	Sjc_0063120	9.17484e+08	43.58	0.00049554	2	1028.62	-4.28681	17.9508	2
QLATkAAR	Sjc_0063120	1.13898e+08	40.09	0.00150352	2	900.523	-3.8807	20.712	1
kSTGGkAPR	Sjc_0063120	3.92237e+08	35.3	0.00289219	2	985.538	-4.44095	19.2617	2
qLATkAAR	Sjc_0063120	2.88233e+08	31.84	0.00409148	2	883.496	-3.88787	28.7413	1
GkGGkTR	Sjc_0063130	6.87458e+06	27	0.0235441	2	787.439	-4.25811	17.7475	2
kHNMMGDTDDEYYIIEK	Sjc_0063550	4.04011e+10	91.98	1.36282e-09	2	2143.92	-3.85608	34.3249	1
kHNMmGDTDDEYYIIEK	Sjc_0063550	1.42369e+10	60.71	1.75364e-06	3	2159.92	-3.7684	31.6312	1
kHNmmGDTDDEYYIIEK	Sjc_0063550	4.76565e+09	58.03	3.25043e-06	2	2175.91	-4.06235	29.8249	1
YPEIHkHR	Sjc_0063550	3.65949e+06	31.56	0.00775038	2	1121.58	-4.41393	21.3336	1
kHLLATSPK	Sjc_0063550	2.99889e+08	30.29	0.00388193	2	1036.61	-4.43478	21.7809	1
RGDVkTMSESLAIAR	Sjc_0063550	8.02292e+06	22.48	0.0737243	2	1675.87	-4.80148	31.7545	2
NISkISEIVQNVMVPAFVPR	Sjc_0065510	8.74374e+06	30.86	0.00352751	3	2283.25	-1.30126	48.3015	1
NTSkSSEVTENKT	Sjc_0066380	2.25723e+06	57.97	1.26872e-05	2	1466.69	-3.16901	21.2977	2
NAGkSADEMR	Sjc_0070960	6.24912e+06	37.09	0.000586302	2	1120.5	-5.26651	21.4825	1
DILMHYDEkNPLPK	Sjc_0076300	8.70502e+07	42.69	0.000624393	2	1754.87	-4.40221	34.8974	1
YNLkQFQDIADSVK	Sjc_0076820	25539127	69.63	1.30127e-06	2	1710.87	-2.70413	39.3787	1
PILETTKSmPQNSk	Sjc_0080290	704292	20.87	0.0883942	2	1631.83	-0.742594	17.5361	1
SLHDALLVVkR	Sjc_0082530	6.04976e+07	50.88	2.85804e-05	2	1292.76	-4.40245	32.8689	1
LFHWDkPSDSWK	Sjc_0088510	23948659	25.73	0.019112	2	1587.75	-4.17401	35.8145	1
VSSTAkSSDAVkNISAK	Sjc_0089810	1.3016e+07	29.54	0.0132852	2	1776.93	-1.84121	28.3309	2
LSRFkmEK	Sjc_0099640	1.63243e+07	25.05	0.0329801	2	1096.57	-7.61034	36.8649	2
DNSGNNQDGPPTkFQR	Sjc_0111740	5.06598e+07	51.16	3.13895e-05	2	1816.81	-3.95638	28.2142	1
kGNTSTASkR	Sjc_0112250	2.43861e+06	51.86	8.11277e-05	2	1133.59	-4.61398	18.1291	2
LQQNkLLR	Sjc_0112250	1.34968e+08	44.06	0.000241477	2	1054.63	-2.92207	27.1811	1
LINQTVFPVTYTEkFYSDVLK	Sjc_0120450	7.37168e+08	36.86	0.00191639	3	2547.33	-2.02342	45.7054	1
YGHYAkEcTESGGSGPQcYK	Sjc_0200160	3.02847e+07	41.54	0.000144857	3	2320.95	-3.18299	24.8246	1
IDQNcVVGLAYkLK	Sjc_0200380	1.04402e+08	44.16	0.000548701	3	1662.88	-3.09487	38.1147	1
ALAQkYNcEK	Sjc_0200460	5.37419e+06	24.1	0.0307346	2	1266.61	-4.39113	24.5657	1
FGEEFDEkTSDGR	Sjc_0200770	1.6104e+07	53.08	1.01611e-05	2	1558.66	-4.61386	32.4524	1
YAGkHFR	Sjc_0209670	3.63828e+07	39.7	0.00108223	2	920.469	-4.70233	21.4917	1
SASSSTDkPR	Sjc_0211040	3.21242e+06	47.36	0.000121212	2	1077.51	-5.32353	18.5452	1
AkAVNQILR	Sjc_0212510	1.34968e+08	17.39	0.11217	2	1054.63	-2.93155	27.1811	1
AILkFPSLEAR	Sjc_0214960	47201137	22.72	0.0406269	2	1286.74	-2.76251	38.1589	1
GSADkFLHSTPVAK	Sjc_0217610	1.66785e+07	58.71	1.34586e-05	2	1499.78	-4.32071	28.7884	1
AEPISWSkLEYcK	Sjc_0303290	1.05087e+07	22.91	0.0468189	2	1652.79	-2.76573	36.9952	1
VkHNDSSDPETGKK	Sjc_0304610	1.25303e+06	37.96	0.00137562	3	1583.76	-3.87335	16.1832	2
SETAAkHGEAQVK	Sjc_0304750	1.14188e+07	60.37	8.54049e-06	2	1397.69	-5.18465	18.3032	1
IASkYQSSK	Sjc_0305980	2.10333e+06	21.71	0.0516014	2	1053.55	-5.54596	21.0657	1
kFAPLFDR	Sjc_0307410	3.00009e+07	37.46	0.00177679	2	1035.56	-4.30632	36.2664	1
VQkLLMDFFNGK	Sjc_0308630	1.74789e+07	42.99	0.0005576	2	1481.78	-2.65253	43.1441	1

## Sheet: 28dpi-female
Supplementary Table S1. Identified Peptides and Proteins from 28dpi female worms. The table indicates the name of the identified protein, the sequence of the observed peptide, number of miscleavages and the charge states that were observed.
Sequence	Protein Accessions	Area	IonScore	Exp Value	Charge	MH+ [Da]	ΔM [ppm]	RT [min]	# Missed Cleavages
qQGQALDkYAK	Sjc_0207460	15825770	48.88	0.000126184	2	1274.63	-2.55945	33.4378	1
qLHEYkSQANTYNHLLR	Sjc_0012620	1.47692e+07	35.89	0.00313023	3	2140.05	-3.60587	35.6058	1
qYGQDkHLDK	Sjc_0218970	205107	15.97	0.174764	2	1256.59	-3.98573	28.1139	1
qLATkAAR	Sjc_0063120	5.43075e+07	31.61	0.00476928	2	883.497	-3.05886	30.081	1
qDYkSPTKK	Sjc_0105330	8.20343e+06	16.41	0.239988	2	1119.57	-0.595666	33.4851	2
qkYTQSNGR	Sjc_0064130	1.08529e+06	32.43	0.00394869	2	1106.52	-6.31421	25.3287	1
qkQLQQR	Sjc_0112250	2.42227e+06	29.22	0.00951409	2	953.513	-3.76963	26.5361	1
qkPHPLDLFENVIK	Sjc_0304650	1.95285e+06	24.29	0.0422665	2	1702.91	-4.04359	45.1452	1
qEGQGRPEDIQGkDFK	Sjc_0064380	502776	15.25	0.241816	2	1856.87	-4.56856	30.7885	2
qLEGDKYDWEEkLR	Sjc_0026420	0	21.97	0.0482852	2	1833.86	-4.74969	40.6201	2
mESVAAHkDEVAPVESK	Sjc_0211620	1.49682e+06	41.07	0.00073473	2	1926.91	-3.17362	30.0947	1
sVSSISSkSHDSR	Sjc_0096060	823635	44.86	0.000246574	2	1460.69	-3.888	28.577	1
sVGIPIkVLHDAEGHVVTLETVSGEVFR	Sjc_0201000	0	17.44	0.124581	3	3072.63	-3.73495	49.259	1
qKLkVTNR	Sjc_0203960	1.44374e+09	17.39	0.190597	2	1070.63	-4.62787	25.1848	2
lPkSIFTFk	Sjc_0063500	5.49986e+06	13.61	0.320101	3	1206.68	4.98906	35.9739	1
akHHPDLIFcR	Sjc_0058950	4761929	29.7	0.0105009	3	1477.73	-4.04311	34.55	1
akSSAKPR	Sjc_0055670	986281	48.55	0.000155695	2	928.517	-4.00608	19.6205	2
acGHVkLIYFNGR	Sjc_0063550	5771869	50.4	0.000116281	2	1618.81	-2.68361	38.7973	1
DELNDmkTK	Sjc_0092100	1.40188e+06	29.3	0.00811806	2	1151.52	-4.0208	24.0617	1
DILmHYDEkNPLPK	Sjc_0076300	1.62854e+07	35.16	0.00330697	2	1770.87	-3.00748	35.4853	1
QYLmkPNEYSK	Sjc_0094390	19022995	14.88	0.245441	2	1458.7	6.62865	40.1434	1
LImkVK	Sjc_0004860	6.65487e+06	18.49	0.0978256	2	789.495	5.90299	36.6878	1
MmmTSGQAVkYK	Sjc_0062310	1.54667e+06	52.36	4.01285e-05	2	1448.65	-3.73911	25.1659	1
ImSYIEkGK	Sjc_0208240	2.25067e+06	20.11	0.0745867	2	1126.58	-4.52861	29.4104	1
LmLRYkSR	Sjc_0037810	1.25098e+07	20.25	0.0816613	2	1124.62	-3.2225	44.1707	2
SmDDkQRR	Sjc_0092310	31639.4	13.71	0.319199	2	1093.51	7.70206	22.2231	2
MmMTSGQAVkYK	Sjc_0062310	2.78353e+06	78.49	9.78256e-08	2	1432.66	-3.83678	29.481	1
RFDDASVQSDmkHWPFK	Sjc_0044680	1.02652e+07	28.49	0.00978256	3	2151.98	-3.69543	35.549	2
FDDASVQSDmkHWPFK	Sjc_0044680	1.16802e+07	26.06	0.017118	2	1995.88	-5.23917	36.8736	1
mmmTSGQAVkYK	Sjc_0062310	1.56037e+06	45.74	0.000184269	2	1464.65	-4.0603	24.2339	1
mNDLkVSDR	Sjc_0300770	697619	49.92	8.65803e-05	2	1135.54	-3.39944	26.0712	1
mNPAkYDK	Sjc_0035730	468901	19.14	0.0842272	2	1024.47	-2.97598	22.2065	1
mAQkYGIR	Sjc_0207350	174501	19.36	0.103131	2	1024.52	-3.58387	27.4627	1
mkQQQkQQR	Sjc_0009730	315310	32.26	0.00701265	2	1302.65	-5.03995	17.7379	2
mSENPISNNVPVkFR	Sjc_0004470	3.8726e+07	56.96	2.20503e-05	2	1789.88	-4.80026	36.1353	1
mYGALQGLNkSETAAK	Sjc_0304750	4.57222e+06	63.71	5.14974e-06	2	1739.86	-4.63779	33.7977	1
NQDGNTYSkTASPINYK	Sjc_0302990	513049	51.39	5.91776e-05	2	1942.9	-4.98725	30.8814	1
SNTFIAQAkDLAVR	Sjc_0024400	5.88552e+06	46.42	0.000271361	2	1575.84	-3.46027	39.6682	1
VASFGDLGkSAR	Sjc_0200380	4.14174e+06	43.32	0.000591294	2	1249.65	-4.28548	34.2552	1
ADIGDLASkHK	Sjc_0067360	7.73285e+06	41.92	0.000633047	2	1196.62	-3.49815	28.7257	1
SIGLSNFNkR	Sjc_0217190	2.9355e+06	36.3	0.00277791	2	1177.63	-3.27664	34.9018	1
DILMHYDEkNPLPK	Sjc_0076300	9.35694e+07	34.6	0.00383144	2	1754.87	-4.12396	36.7227	1
LLLEYLEEkYEEHLYER	Sjc_0038300	1.79997e+07	32.84	0.00683795	3	2311.14	-3.0856	46.9001	1
TVQNLLLEkIR	Sjc_0011870	1.00683e+07	32.33	0.00404066	2	1368.82	-3.57876	41.4072	1
EAESLLLAkNLNK	Sjc_0035970	1.42524e+07	25.12	0.025993	2	1484.83	-4.19248	37.4602	1
IEAIPQIDkYLK	Sjc_0038300	1.13761e+07	19.56	0.0918498	2	1472.83	-4.79437	40.4736	1
RVELAEAVkHK	Sjc_0012620	0	15.59	0.190745	3	1321.75	-3.48234	29.6384	2
VELGLAGDkR	Sjc_0065170	1.37956e+06	14.02	0.394297	2	1099.62	5.64068	25.5727	1
LNDAEKVSkSILK	Sjc_0035690	2.43732e+08	13.52	0.307222	2	1486.84	-7.40555	35.8124	2
FTSHFLKSkK	Sjc_0088690	0	13.34	0.396247	3	1264.7	-4.4223	31.0651	2
ELFLPVYkQMLDAmYK	Sjc_0027600	11740247	30.88	0.011228	2	2047.02	-5.53104	46.546	1
FNDPEVQkDmK	Sjc_0026230	0	28.53	0.00969287	2	1408.64	-4.05611	27.9532	1
VSAESLQkQLQk	Sjc_0202700	7.2101e+06	14.21	0.352763	3	1442.79	5.97587	35.41	1
FGEEFDEkTSDGR	Sjc_0200770	2.7374e+07	88.42	9.94151e-09	2	1558.66	-5.39704	34.0786	1
ELADFDSkNVIWVEDEKDGYVLANIK	Sjc_0134610	5.6434e+07	82.46	6.12948e-08	3	3052.51	-3.16134	43.7643	2
LITIAGGkWTTYR	Sjc_0104060	1.77848e+07	72.39	4.96019e-07	2	1521.84	-3.52375	39.5865	1
IPLQDVYkIGGIGTVPVGR	Sjc_0054280	4.15962e+07	63.57	3.03705e-06	2	2024.15	-2.59717	42.5891	1
NLFSVAYkNVVGAR	Sjc_0030210	1.71591e+07	63.42	4.09489e-06	2	1579.85	-4.08745	43.7116	1
LNSLALHkSFK	Sjc_0301250	2.3113e+06	54.98	2.95449e-05	2	1299.74	-3.94872	32.5963	1
LVSTSFDkK	Sjc_0075160	2.70036e+06	40.88	0.000702261	2	1066.57	-3.45025	29.8797	1
DGDEVVDkK	Sjc_0305830	1.36613e+06	39.68	0.000743794	2	1046.5	-3.67214	24.9305	1
NVQEILGkSVEK	Sjc_0044660	3.01776e+06	39.17	0.00130139	2	1385.76	-4.00801	35.6866	1
EVLTLLSkYLTPK	Sjc_0030210	3.01821e+07	35.18	0.0020963	2	1546.9	-2.85448	46.7867	1
SSVEVAEkGAK	Sjc_0031970	397149	30.77	0.0104691	2	1146.6	-3.30999	24.611	1
VTSSISLkHEK	Sjc_0026360	1.56408e+06	23.09	0.0525271	2	1270.69	-4.08628	26.5599	1
LRDQFDFkTR	Sjc_0055610	3.55802e+07	20.76	0.0780698	3	1367.7	-3.71685	33.5627	2
RLEEEAIkYK	Sjc_0001510	2.16537e+06	17.61	0.234064	2	1320.71	-4.05046	29.1795	2
EKAALAAkK	Sjc_0009350	3.98857e+06	16.21	0.211808	2	971.586	-2.93069	21.3974	2
SVSTSSkYVNGK	Sjc_0201910	786678	56.17	2.29469e-05	2	1298.65	-4.11071	25.1327	1
YDSTHGkFQGDVSVENGK	Sjc_0025800	4.75933e+06	52.11	4.25062e-05	2	2009.91	-3.17152	29.7703	1
TPYEQDkHYGEESYNVQNNEK	Sjc_0089450	3.59572e+06	51.14	5.31438e-05	3	2614.13	-2.81695	29.7013	1
IQDSNLkYQSR	Sjc_0209790	265725	50.59	0.000110431	2	1393.7	-3.92524	28.186	1
LTHELQkFGIK	Sjc_0212050	6.51748e+06	47.45	0.0001592	3	1355.76	-3.41678	34.9953	1
LNAEIEkAQGIQK	Sjc_0002020	316682	41.95	0.00065422	2	1483.81	-4.26803	30.9514	1
TQEEYAkLLAQR	Sjc_0074090	8.87294e+06	38.6	0.00186352	2	1491.77	-5.18026	36.097	1
LEEEAIkYK	Sjc_0001510	1.03021e+06	36.53	0.00272355	2	1164.61	-3.50589	30.1807	1
DLKDDLkSDTSGDFR	Sjc_0101450	1.07492e+07	31.6	0.00501577	2	1753.82	-4.71251	36.5954	2
DELNDMkTK	Sjc_0092100	1903107	30.77	0.00578699	2	1135.53	-4.25549	29.5849	1
YAWVLDkLK	Sjc_0054280	1.04904e+07	25.75	0.0235474	2	1177.66	-3.47979	42.5361	1
LGFINGkIK	Sjc_0096090	37321484	23.12	0.0336862	2	1031.62	-3.35473	38.2405	1
HGEAQVkIWR	Sjc_0304750	1.30557e+06	16.6	0.236278	3	1265.67	-1.75611	31.0256	1
SSSISkkNSR	Sjc_0039940	173345	15.03	0.387853	2	1177.62	-0.368951	26.8801	2
YGHYAkEcTESGGSGPQcYK	Sjc_0200160	1.74872e+06	35.8	0.00181741	3	2320.95	-4.68195	27.7181	1
SIYGNkFEDESFDNK	Sjc_0001030	2.12361e+07	65.3	2.03917e-06	2	1834.8	-4.40759	36.8165	1
KQLATkAAR	Sjc_0063120	9.13208e+07	51.86	7.33082e-05	2	1028.62	-3.57476	21.3693	2
YKEIIkEVSGYIK	Sjc_0054280	1.31387e+07	49.32	8.08077e-05	2	1611.89	-3.82922	37.7063	2
EHTDFkHR	Sjc_0211970	1.4492e+07	45.07	0.000215007	2	1111.52	-3.70212	22.3653	1
SETAAkHGEAQVK	Sjc_0304750	3.95018e+06	44.42	0.000388516	2	1397.7	-3.08855	19.7377	1
IVHFEkDFLK	Sjc_0089940	1.46408e+07	39.97	0.00114287	3	1317.71	-3.95103	37.1498	1
IVVEYkGEEK	Sjc_0044680	1.90265e+06	38.32	0.0014944	2	1235.65	-2.91777	30.1257	1
AIIAQkYK	Sjc_0211260	5.94069e+06	35.58	0.00191184	2	976.579	-3.43553	29.5699	1
LFHWDkPSDSWK	Sjc_0088510	3.95123e+07	35.2	0.00215927	2	1587.75	-3.02077	38.1348	1
YIHEAkSYK	Sjc_0211220	1.51841e+07	34.69	0.00443211	3	1180.6	-3.4479	24.8074	1
DQFDFkTR	Sjc_0055610	3.39438e+07	31.79	0.00457565	2	1098.52	-3.41233	34.9713	1
NVDIFkHIIPNVVK	Sjc_0054460	1.28577e+07	31.65	0.00472555	2	1677.96	-4.17696	41.3998	1
SIYGNkFEDESFDNKHDK	Sjc_0001030	1.13183e+07	26.19	0.0166132	3	2214.98	-4.22806	33.3613	2
TPSAIkPKSSPK	Sjc_0078660	1.15628e+06	25.91	0.0177195	2	1282.73	-3.01909	22.8331	2
FEAETkSK	Sjc_0307410	370583	22.07	0.0574304	2	981.485	-3.52341	23.7485	1
YPEIHkHR	Sjc_0063550	8.31013e+06	21.67	0.0646731	2	1121.58	-3.32555	25.0564	1
NFETIkR	Sjc_0085600	405945	18.38	0.167719	2	949.513	3.32482	24.1338	1
DSFVQkAK	Sjc_0035030	2.02829e+06	17.58	0.18593	2	964.505	-4.80113	30.6853	1
HTEEMkWQAEK	Sjc_0216280	1.13581e+06	16.83	0.143368	2	1458.66	-3.42827	28.8844	1
GLGLkANEmR	Sjc_0305830	577681	26.3	0.0294201	2	1146.59	-1.14125	29.3379	1
VVSGkAAkk	Sjc_0016080	870127	20.75	0.0614218	2	1013.6	-3.29186	27.3641	2
VVSGkAAkK	Sjc_0016080	3.98857e+06	55.59	2.44311e-05	2	971.585	-3.93067	21.9215	2
AAGGkkHTK	Sjc_0058210	1.15231e+06	45.77	0.000243662	2	981.542	-5.34394	17.4723	2
IIGSkkDQYFLDK	Sjc_0007580	2.85729e+07	44.65	0.000356478	2	1638.87	-4.16162	37.593	2
ALAQkYNcEK	Sjc_0200460	648293	26.55	0.018258	2	1266.61	-3.42737	26.5381	1
YNIEkDIAAYIK	Sjc_0080420	5.08913e+06	62.24	6.26887e-06	2	1482.78	-3.24793	43.0977	1
TANGkYSVAQVR	Sjc_0300770	5.41325e+06	60.99	1.00316e-05	2	1335.7	-3.65609	29.2016	1
ALFEkLNMDLFLK	Sjc_0201800	6.07528e+06	57.39	1.52295e-05	2	1623.88	-3.7136	48.5146	1
NEWFkNSVLTK	Sjc_0002330	8.00938e+06	52.68	7.68803e-05	2	1407.72	-4.34578	38.5915	1
GSADkFLHSTPVAK	Sjc_0217610	4.3458e+06	44.88	0.000321836	2	1499.78	-4.4021	31.0947	1
VASEkYAK	Sjc_0026090	1.30886e+06	39.98	0.000813739	2	937.495	-3.91409	22.1766	1
RGDVkTMSESLAIAR	Sjc_0063550	4.06898e+06	36.78	0.00285456	2	1675.87	-3.63604	34.7693	2
QLATkAAR	Sjc_0063120	5.08e+06	35.81	0.00402818	2	900.522	-4.35514	23.2959	1
LQQNkLLR	Sjc_0112250	5.25852e+07	33.3	0.00323186	2	1054.63	-3.15356	30.2963	1
DEGDkWR	Sjc_0038300	2.2224e+06	32.04	0.00431969	2	947.419	-3.14169	29.9532	1
DAFLkSHGVK	Sjc_0112430	5.89888e+06	27.87	0.0186168	2	1143.61	-4.66692	29.6532	1
GYGYkNSTFHR	Sjc_0001030	1.94883e+06	25.42	0.0198359	2	1371.64	-3.88355	28.872	1
EGFEkISK	Sjc_0215010	1.84458e+06	22.87	0.0482849	2	979.506	-3.20676	29.9239	1
SVVTkDSESK	Sjc_0200770	183109	22.14	0.0662872	2	1121.57	-2.91838	22.9263	1
LGANkQIIR	Sjc_0007400	5.25852e+07	17.78	0.1152	2	1054.63	-3.16304	30.2963	1
QSEIkK	Sjc_0052660	413030	17.1	0.304176	2	774.434	-2.32666	21.2284	1
FSVEkEAK	Sjc_0301620	1.84458e+06	16.95	0.188717	2	979.506	-3.20676	29.9239	1
VALHkLR	Sjc_0041560	5.12831e+06	16.41	0.157926	2	878.555	-2.12044	29.8731	1
EFAAkFTPK	Sjc_0024400	3.46902e+06	15.45	0.2794	2	1080.57	-2.63622	35.101	1
LFVVkLR	Sjc_0029090	1.03917e+07	15.15	0.211083	2	916.594	-3.73918	41.5029	1
EQNIkHSSENST	Sjc_0030630	226440	14.75	0.231447	2	1415.64	-2.89523	21.9191	1
TIAYkK	Sjc_0066080	762978	14.41	0.250295	2	765.448	-3.25385	29.7907	1
NEALkHR	Sjc_0078530	205589	13.9	0.323867	2	909.488	-2.58032	19.9699	1
VVGkSQSSmK	Sjc_0025560	1.20244e+06	35.96	0.00268724	2	1108.56	-4.33359	19.5605	1
NAGkSADEmR	Sjc_0070960	327793	28.55	0.00964834	2	1136.5	-3.83298	19.3987	1
GLGkGGAkR	Sjc_0016100	1.25093e+08	40.15	0.000667502	2	927.534	-3.69079	24.0602	2
HITkcVDVVDIESIKDK	Sjc_0074810	2.24099e+07	45.12	0.000329142	3	2041.06	-3.43872	34.6812	2
AFNkVAGDDGEIDADELRDILNcAFTR	Sjc_0300430	1.7094e+07	40.15	0.000806652	3	3067.43	-4.49631	47.2162	2
YNLkQFQDIADSVK	Sjc_0076820	2.10991e+07	74.9	3.9802e-07	2	1710.86	-3.63168	40.8492	1
AFNkVAGDDGEIDADELR	Sjc_0300430	1.08878e+07	73.15	3.34543e-07	2	1976.91	-3.757	36.1371	1
GVLkVFLENVIR	Sjc_0016100	11154859	55.42	1.98359e-05	2	1428.85	-2.84649	51.0693	1
VTEkYTEEEQLNK	Sjc_0044660	4.708e+06	53.19	4.41355e-05	2	1652.8	-3.7589	29.6182	1
NIDkFVSEAADLAGDFGNAAR	Sjc_0208800	1.35589e+07	49.74	0.000121033	2	2223.06	-1.25381	48.4134	1
FLVkEFQR	Sjc_0026230	34583605	49.72	7.36975e-05	2	1108.61	-3.60522	36.3119	1
EAMkYAENLTVTHPIR	Sjc_0204420	1.01365e+07	44.09	0.000434785	2	1914.97	-4.77858	34.8843	1
VFGkTYTTPR	Sjc_0304980	2.13196e+06	42.55	0.000480857	2	1211.64	-4.46841	31.4272	1
LTQkYDDLDDK	Sjc_0030640	919570	37.15	0.00136854	2	1395.66	-1.5746	30.3585	1
NTSkSSEVTENKT	Sjc_0066380	466458	37.09	0.00145598	2	1466.69	-4.16775	22.8306	2
HQYkDAFLK	Sjc_0112430	5.021e+06	31.03	0.0100185	2	1191.61	-3.84749	31.1309	1
LSSkFDVR	Sjc_0035720	1.83996e+07	29.89	0.0126155	2	993.534	-2.38756	33.0509	1
LVLkHIR	Sjc_0015290	1.80126e+07	28.08	0.0107511	2	920.6	-4.02774	34.156	1
ELSkNGSILR	Sjc_0000750	6.26026e+06	28.06	0.0196957	2	1158.65	3.25426	46.5244	1
GEEkSFFPEEISSMVLVAMK	Sjc_0044680	1.98141e+06	24.83	0.0376535	3	2300.11	-2.21317	50.9276	1
VMSkVMPDEIYNLAAQSHVK	Sjc_0074530	6.10588e+07	21.74	0.0827307	3	2302.15	-4.17489	39.7593	1
AMEkYK	Sjc_0051340	372612	20.94	0.0556484	2	811.399	-3.89089	24.141	1
LSSkAR	Sjc_0036170;Sjc_0048460	4.7429e+06	17.87	0.219645	2	703.407	-3.8616	24.0937	1
QKLkVTNR	Sjc_0078270;Sjc_0214400	9.13208e+07	17.44	0.202839	2	1028.62	-3.32769	20.8573	2
HIAkAIR	Sjc_0014130	1.58002e+07	17.3	0.128663	2	850.523	-3.35149	29.9964	1
LMDkDLIIR	Sjc_0014090	6.26026e+06	17.07	0.247383	2	1158.65	-3.1411	46.5244	1
MSNkDLK	Sjc_0060330	516356	16.37	0.268736	2	877.438	-7.46067	25.0872	1
LGQkYIHEAK	Sjc_0211220	576537	15.98	0.264965	2	1228.66	-3.56176	26.6257	1
FIVkVLR	Sjc_0089770	1.03917e+07	15.15	0.211083	2	916.594	-3.73918	41.5029	1
HIPkLK	Sjc_0022470	7.52739e+06	14.44	0.248572	2	777.495	-3.54648	29.9552	1
IDTkGMDK	Sjc_0214540	965317	14.26	0.388097	2	949.47	4.33193	29.5873	1
ELSkFK	Sjc_0092100	1.5785e+06	14.18	0.368576	2	793.443	-3.67237	29.3619	1
SGkFmNPTDQAR	Sjc_0216870	1.2143e+06	44.27	0.000258495	2	1409.64	-2.93474	28.3976	1
PPkVVSGkAAK	Sjc_0016080	327633	20.92	0.0559052	2	1165.69	-3.75615	25.4594	2
AGkDSGkAK	Sjc_0091770	43806.6	33	0.00691638	2	945.496	-3.99566	19.2684	2
GGkGLGkGGAK	Sjc_0016100	3.63033e+07	28.4	0.0119249	2	1013.57	-3.78501	24.064	2
ASkVkLPK	Sjc_0016080	2.09108e+07	26.34	0.0160492	2	954.595	-3.49262	29.4884	2
NLkkANR	Sjc_0074630	1.25093e+08	16.33	0.160862	2	927.534	-3.66923	24.0602	2
IIkFIVHcLkDK	Sjc_0089040	2.64239e+07	16.66	0.154279	3	1597.9	-7.61937	49.6771	2
SSkFPYcDGAHNK	Sjc_0074810	1.16328e+07	31.7	0.00467146	2	1552.68	-4.38089	28.9401	1
INkYAYSGGGDTVAEHR	Sjc_0030360	406631	47.66	0.000162826	2	1879.88	-4.81485	29.5033	1
FFkYNASVAR	Sjc_0300430	1.18403e+07	37.42	0.00226418	2	1244.64	-3.83849	34.7274	1
LPkSVVELYR	Sjc_0302240	1.29983e+07	36.74	0.0014637	2	1245.72	-3.6706	37.5638	1
FGkFIR	Sjc_0054830;Sjc_0035730	3.53723e+06	34.08	0.00270055	2	809.463	-4.18643	35.1629	1
VNkTLDTK	Sjc_0054830	1.98036e+06	33.59	0.00483462	2	960.533	-3.32293	24.5686	1
APkSNEDVYHFVSYLPINGTLYELDGLKPGPIDHGK	Sjc_0060830	9.89862e+07	32.72	0.00384886	5	4026.01	-4.45601	43.9332	2
MEkVGSQSGR	Sjc_0001030	77185.9	27.25	0.0157285	2	1120.54	-3.52603	23.633	1
FFkGGQYAQAISLYDEGLKK	Sjc_0013160	2.32499e+07	26.37	0.029065	3	2305.17	-5.35791	39.6257	2
IPkVQQLLQSFFEKEPNR	Sjc_0201800	6.71902e+06	26.18	0.0166515	3	2243.21	-3.13766	47.6912	2
LTkSWSLR	Sjc_0043640	7.59528e+06	25.89	0.023831	2	1032.58	-0.147792	32.3425	1
VQkHQNFEAEIQANQSR	Sjc_0034150	1.30181e+06	24.25	0.0377717	3	2069.01	-3.89492	29.9214	1
ELkAMMER	Sjc_0212050	1.52023e+06	23.76	0.0340789	2	1049.51	-4.53415	32.4915	1
FVkYDEK	Sjc_0042440	919915	20.15	0.0667502	2	970.484	-3.93289	28.0966	1
KGkYDLDFK	Sjc_0209670	5.79663e+06	20.11	0.0867741	2	1155.6	-3.23701	32.8834	2
EDkYGAHNYHPLPVALSK	Sjc_0302240	3.19005e+07	19.99	0.118773	3	2081.04	-3.89462	32.5173	1
NSkFEVSQVER	Sjc_0204880	1.32703e+06	18.66	0.156566	2	1364.67	-6.12569	31.9505	1
YQkEVNNSK	Sjc_0216830	2.65783e+06	18.54	0.104969	2	1151.56	-4.99687	25.3621	1
FVkYLTK	Sjc_0025200	8.09856e+06	17.99	0.109762	2	940.547	-3.8689	32.754	1
LSkLPDSNVK	Sjc_0030190	2.74267e+06	17.59	0.17331	2	1142.65	6.0113	29.5737	1
LGkWFVQPR	Sjc_0024390	1.23605e+07	17.42	0.198342	2	1172.65	-2.62631	42.108	1
YDkVAGAEEALK	Sjc_0215490	4.01437e+06	17.26	0.215182	2	1335.67	-3.29877	34.7633	1
FSkYMPK	Sjc_0000230	238850	16.8	0.144362	2	942.473	-2.13382	31.0334	1
YVkTIK	Sjc_0301170	304378	16.35	0.160123	2	793.479	-3.74036	24.5548	1
QIkSNIR	Sjc_0012060	5.08e+06	16.28	0.3615	2	900.522	-4.34404	23.2959	1
IGkFPISANSR	Sjc_0205700	7.55305e+06	15.7	0.310872	2	1231.67	-4.78762	34.6245	1
QPkVLENSEGSR	Sjc_0026230	1.01519e+06	15.13	0.354472	2	1385.7	-3.46767	26.4392	1
TTkDIR	Sjc_007053	906108	14.94	0.344674	2	775.429	-2.49495	28.9572	1
EAkYIAEDADR	Sjc_0304180	809710	14.41	0.250295	2	1322.62	-5.15659	29.0244	1
FAkWR	Sjc_0031630	1.04362e+07	13.91	0.280836	2	749.406	-4.89595	32.2821	1
SEkLLGIIVSFGR	Sjc_0041650	6.77772e+07	13.48	0.310065	3	1460.86	8.99394	43.0519	1
NADMSPEMQDDAVHVAASAMDKFDVEkDVAAFIK	Sjc_0025950	1.88338e+07	22.42	0.0395779	3	3737.7	-4.4535	46.5134	2
NADMPEDMQQDAIEVATHAFEKYNIEk	Sjc_0080420	3.05647e+07	18.27	0.102909	3	3179.41	-5.98117	47.4029	1
YKDGVVLAADLLVSYGSLAkYMDFER	Sjc_0068310	1.13352e+07	67.93	1.81198e-06	3	2965.5	-2.18646	51.7607	2
FKVILASSAYHLNNENSLSkR	Sjc_0019680	0	16.37	0.249129	3	2433.27	-7.90913	50.8409	2
VkmPPPVNLLPPQR	Sjc_0075730	4.24364e+07	13.02	0.344709	4	1643.93	1.60027	38.4447	1
TkESEAIk	Sjc_0017220	243039	15.24	0.384506	2	989.511	-4.20458	27.297	1
LkNHFLk	Sjc_0047510	1.69669e+06	21.2	0.0524146	2	983.563	-3.91248	31.9232	1
MkQQQkQQR	Sjc_0009730	1.77546e+06	37.26	0.00204846	2	1286.66	-2.79302	19.522	2
GkGGkSR	Sjc_0063110	1.11669e+06	31.98	0.0111878	2	773.422	-5.48669	17.6367	2
GkQIkSNIR	Sjc_0012060	330936	29.51	0.00940328	2	1127.65	-4.3811	25.8881	2
GkGGkTR	Sjc_0063130	689327	23.9	0.0480709	2	787.44	-3.32797	19.0198	2
HkSkTFIIK	Sjc_0060700	7.69265e+06	13.46	0.38094	2	1185.69	-4.87175	36.4334	2
DkTAYcR	Sjc_0074810	1.80816e+06	32.78	0.00364294	2	955.426	-4.72409	24.0663	1
GkYPAcGTK	Sjc_0089450;Sjc_0214180	1.1557e+07	25.23	0.0259428	2	1023.49	-2.72838	23.7132	1
EkcFMSR	Sjc_0024440	586805	21.88	0.044818	2	999.446	7.15204	19.6896	1
AkVIFVLGGPGSGK	Sjc_0212050	1.11939e+08	89.04	8.61891e-09	2	1371.8	-3.24739	38.7786	1
SkFDGTTVYAQNK	Sjc_0034190	1.27865e+07	49.65	9.53856e-05	2	1500.73	-4.62879	31.2121	1
YkSNENPWFFHK	Sjc_0011460	1.97964e+07	44.97	0.000220015	2	1638.76	-5.09654	36.7246	1
VkVGTEFVTK	Sjc_0054830	8.24339e+06	36.47	0.00172449	2	1149.65	-4.07098	31.9526	1
YkSDETEIEK	Sjc_0044460	896833	32.74	0.00367665	2	1283.59	-4.22418	25.7971	1
GkFQEAVNR	Sjc_0086950	1.14422e+06	32.16	0.00741925	2	1090.56	-4.49922	29.2919	1
SkFSITSK	Sjc_0207460	1.922e+06	28.89	0.0089218	2	939.511	-4.06224	30.9095	1
AkYESLAQVEK	Sjc_0051340	3.07879e+06	28.89	0.0162694	2	1307.68	-4.91277	31.7827	1
SkYHLQDVIIGK	Sjc_0077550	7.2101e+06	28.2	0.0140761	3	1442.79	-4.59043	35.41	1
SkFDGTTVYAQNKR	Sjc_0034190	1.19255e+06	25.54	0.0315557	2	1656.83	-2.37838	29.6334	2
LkVNETAK	Sjc_0049690	2.17465e+06	25.06	0.0344637	2	944.539	-2.69389	23.8614	1
SkWLPK	Sjc_0214350	941290	24.66	0.0359078	2	800.462	-5.18125	32.768	1
DkHISLDDNDSSESR	Sjc_0207030	259171	21.49	0.0490289	2	1759.77	-4.23112	28.7614	1
AkYDVDK	Sjc_0303190	669674	21.42	0.0576886	2	880.438	-3.834	24.824	1
DkTSLTSPAR	Sjc_0217300	430014	20.67	0.113129	2	1117.58	-3.44144	27.5104	1
AkWTAWNGR	Sjc_0116460	1.06792e+07	20.38	0.0934545	2	1131.57	-3.62426	35.7295	1
DkFQNIGAK	Sjc_0215010	2.87701e+06	20.02	0.138859	2	1062.55	-5.60803	30.9719	1
GkYDLDFK	Sjc_0209670	1.97654e+07	18.49	0.0978256	2	1027.51	-3.87885	36.0614	1
AkAVNQILR	Sjc_0212510	5.25852e+07	17.78	0.1152	2	1054.63	-3.16304	30.2963	1
GkFLNILGK	Sjc_0059840	2.46425e+07	17.28	0.129257	2	1031.62	-2.76308	38.8209	1
LkGIQNR	Sjc_0218990	5.27646e+06	16.57	0.17293	2	870.512	-3.65137	22.8259	1
FkFSR	Sjc_0092110	6.55702e+06	16.09	0.170001	2	726.39	-4.71664	30.8667	1
YkSLFGK	Sjc_0211260	2.66938e+06	14.63	0.237932	2	884.484	-4.62212	35.3028	1
SkYSDDSTNR	Sjc_0043880	0	14.41	0.250295	2	1214.52	-4.56274	22.1509	1
GLSFAENFLLSGAAAVIAkTAAAPIER	Sjc_0062310	9.17732e+06	28.14	0.0106036	3	2730.47	-3.89211	53.2032	1
GHQMPVAFLVVASGLNkHGLDSK	Sjc_0204550	9814565	24.28	0.0404976	3	2447.28	-2.20459	41.6017	1
IGAQALVNSENAEISkQVYAVNFK	Sjc_0200380	2.52099e+07	33.64	0.00406563	3	2635.36	-4.16938	41.4035	1
SGLIVSYHPPIFSSLkK	Sjc_0210250	18070758	30.52	0.00612989	2	1915.06	-2.83239	39.6216	1
ALADHHVYLEGTLLkPNmVTAGQAcK	Sjc_0031630	1.00241e+07	15.41	0.328023	3	2895.44	-4.60658	35.6828	1
ALADHHVYLEGTLLkPNMVTAGQAcK	Sjc_0031630	2.23132e+07	37.69	0.00198301	3	2879.44	-4.27845	37.5236	1
IEYPDETENAEEVNkHV	Sjc_0032940	4924975	58.78	9.15066e-06	2	2057.93	-1.97648	34.4753	1
MQENAVHIAAAALDkYNVEK	Sjc_0025920	1.0757e+07	35.35	0.00353009	3	2257.12	-3.80274	39.4128	1
LINQTVFPVTYTEkFYSDVLK	Sjc_0120450	5.36957e+08	28.24	0.014247	3	2547.33	-3.24541	47.7746	1
MSENPISNNVPVkFR	Sjc_0004470	7.57569e+07	39.6	0.00132126	2	1773.89	-4.68227	37.1387	1
VPHNAAVQIYDYkNK	Sjc_0044460	8.46899e+07	31.6	0.00937431	2	1801.91	-4.84484	32.7319	1
VPHNAAVQIYDYkNKR	Sjc_0044460	1.2759e+07	21.53	0.0896417	2	1958.01	-5.10541	31.2774	2
TLHFVVSDVEPkYYADGEDAYAmR	Sjc_0031810	3.01829e+07	55.4	1.99275e-05	3	2834.28	-5.66557	38.7565	1
INVYYNEASGGkYVPR	Sjc_0060500;Sjc_0090690	5.45244e+06	73.23	5.37129e-07	2	1871.92	-5.30874	35.4832	1
YFPTQALNFAFkDK	Sjc_0062310	45695079	67.13	2.36243e-06	2	1731.87	-2.01703	43.6358	1
TLHFVVSDVEPkYYADGEDAYAMR	Sjc_0031810	1.49087e+08	48.86	9.2312e-05	3	2818.29	-2.86745	39.9017	1
RFDDASVQSDMkHWPFK	Sjc_0044680	47712983	44.32	0.000262578	3	2135.99	-4.01778	38.0523	2
EAAESSLLAYkEAMK	Sjc_0204420	9.40036e+06	63.14	4.56171e-06	2	1682.82	-4.87931	39.2091	1
LGLIPLAVDPkYFLFPTR	Sjc_0014050	6.93498e+06	62.34	4.03137e-06	2	2102.2	-3.17121	52.1635	1
IVFELFDNVPkTAENFR	Sjc_0001030	8.95662e+06	52.27	7.32263e-05	2	2081.06	-3.85036	45.4612	1
DSIPPLIVFAkDGHYALSDLSK	Sjc_0084260	2.62343e+07	51.5	7.50423e-05	2	2428.27	-4.235	47.5282	1
IASTSSTSNSkFLDNDPK	Sjc_0208450	775877	45.65	0.000239598	2	1953.93	-4.85007	30.7834	1
FDDASVQSDMkHWPFK	Sjc_0044680	6.05178e+07	22.04	0.0431969	2	1979.89	-3.84223	39.8489	1
IEEELGSTAkYAGK	Sjc_0209670	1.61536e+07	78.32	1.58274e-07	2	1537.77	-3.9916	30.8979	1
MYGALQGLNkSETAAK	Sjc_0304750	8.60299e+06	63.19	6.57235e-06	2	1723.86	-4.93974	35.2641	1
MMMTSGQAVkYK	Sjc_0062310	5.72831e+06	57.05	1.36286e-05	2	1416.66	-4.53982	31.0132	1
FHDKPFNQGkIFK	Sjc_0042030	1.42786e+06	41.25	0.000971113	2	1647.86	-2.63701	32.0949	2
FDEFEISGSkYAPEGIVYHHGR	Sjc_0047360	2.91958e+07	37.5	0.00129814	3	2580.21	-2.97204	37.4282	1
GTEAEDDNTkFK	Sjc_0079130	289239	28.74	0.00923533	2	1396.62	-4.03351	26.7509	1
NAEQYAEIDkK	Sjc_0026230	256364	26.02	0.0230032	2	1350.65	-4.44653	29.5488	1
SLHDALLVVkR	Sjc_0082530	2.28981e+07	25.02	0.0217497	2	1292.76	-4.49687	35.8159	1
kLYIRHNImSLSPR	Sjc_0301740	0	16.29	0.176222	2	1785.99	8.47207	46.7494	2
kHNMmGDTDDEYYIIEK	Sjc_0063550	1.16194e+10	69.5	7.75269e-07	3	2159.92	-3.59885	34.6431	1
kHNmmGDTDDEYYIIEK	Sjc_0063550	4.48294e+09	79.21	8.28805e-08	3	2175.91	-6.22843	33.9026	1
kGNTSTASkR	Sjc_0112250	646661	76.33	2.89847e-07	2	1133.59	-3.86018	19.4314	2
kKIVQEGGk	Sjc_0100090	1.44374e+09	22.32	0.0612514	2	1070.63	5.85198	25.1848	2
kAYDALLkQHR	Sjc_0043160	3.59673e+08	16.36	0.258951	3	1426.77	-8.95216	41.2718	2
kFIPITTk	Sjc_0208630	37321484	13.61	0.300921	2	1031.62	7.54559	38.2405	1
kKLMTTk	Sjc_0316490	2.09482e+06	16.23	0.212026	2	933.548	4.37884	31.8258	2
kLLEEkk	Sjc_0035210	870127	13.94	0.294661	2	1013.6	7.79738	27.3641	2
kQLATkAAR	Sjc_0063120	1.44374e+09	63.74	4.41689e-06	2	1070.63	-4.63721	25.1848	2
kSTGGkAPR	Sjc_0063120	7.96649e+07	46.4	0.00021076	2	985.539	-3.38813	19.6874	2
kPKSTk	Sjc_0205410	158418	15.84	0.345315	2	772.454	-3.10082	28.1547	2
kLNLkIR	Sjc_0300050	3.72794e+07	19.83	0.0718543	2	968.622	-3.46736	40.2818	2
kNkVANk	Sjc_0086650	1.25093e+08	14.97	0.220015	2	927.534	8.44354	24.0602	2
kFDDVAcK	Sjc_0304610	291496	18.33	0.101497	2	1024.47	-3.34223	28.1498	1
kHVcNDDGSVLVVSK	Sjc_0310070	3.47109e+06	41.27	0.000735252	3	1698.84	-3.71509	29.0388	1
kYcTVVR	Sjc_0213900	287989	26.89	0.0141401	2	967.499	-3.67241	26.3085	1
kHNMMGDTDDEYYIIEK	Sjc_0063550	28474572756	87.55	1.21465e-08	2	2143.92	-3.7422	36.1261	1
kYADSQAELENAQR	Sjc_0054830	1.9718e+06	73.92	2.91966e-07	2	1664.78	-4.02875	28.8525	1
kYEQLEEVTAK	Sjc_0034150	1.79291e+06	56.55	2.71104e-05	2	1379.7	-3.69166	31.9137	1
kHAETELEETQSR	Sjc_0027340	602288	38.58	0.0011094	2	1599.75	-4.45976	24.4945	1
kHSQFINYPIK	Sjc_0044660	7.01395e+06	36.54	0.00268402	2	1416.76	-3.16749	32.5892	1
kYQSVTGGIQR	Sjc_0035730	1.24645e+06	36.43	0.00306001	2	1278.68	-2.87571	28.224	1
kHLEDEHER	Sjc_0050230	51794.1	36.25	0.00163852	3	1234.58	-3.7463	21.2516	1
kFAPLFDR	Sjc_0307410	2.74406e+07	36.04	0.00242664	2	1035.56	-3.48117	38.6486	1
kHEDFNR	Sjc_0034150	304344	27.89	0.0112319	2	987.462	-2.80708	21.4468	1
kHNMMGDTDDEYYIIEKMIGQVEDVESEYHK	Sjc_0063550	8.67993e+06	27.63	0.0119248	4	3788.67	-2.62879	47.2972	2
kFEAFGK	Sjc_0212210	1.13257e+06	21.14	0.0531438	2	868.454	-2.35365	32.7657	1
kLQFTPR	Sjc_0009930	4.03861e+06	19.58	0.121169	2	931.535	-0.872164	34.7616	1
kSAPATGGVK	Sjc_0063120	709287	18.27	0.187659	2	957.534	-2.16905	21.1927	1
kYDIEK	Sjc_0025950	326554	17.68	0.117883	2	837.432	-4.07791	26.4125	1
kQFKNVK	Sjc_0095570	2.09482e+06	15.38	0.257864	2	933.548	-4.03529	31.8258	2
kHDALER	Sjc_0034150	358157	15.23	0.259428	2	910.471	-3.46132	21.4328	1
kPVPESSLLDKISK	Sjc_0214210	369388	14.23	0.260887	2	1582.91	2.59079	27.6428	2
kTSMFPR	Sjc_0051950	779207	14.2	0.330765	2	908.47	4.26856	29.2968	1
kFEELK	Sjc_0044660	976441	14.17	0.317745	2	835.454	-2.69716	29.882	1
kYLVEK	Sjc_0057810	105221	13.86	0.284088	2	821.473	-4.48735	27.7592	1
kHQETIVNALK	Sjc_0080950	935636	13.26	0.326176	2	1322.74	-3.13993	29.931	1
VKIDQNcVVGLAYkLK	Sjc_0200380	2.10921e+07	23.42	0.0359441	3	1890.05	-3.40046	38.1771	2
RLSDLckVLK	Sjc_0082570	8.83858e+06	19.38	0.0963133	3	1273.73	-2.77169	37.2088	2
VTQEcQkLQYR	Sjc_0093720	397173	28.93	0.0114505	2	1494.73	-4.32449	29.5415	1
TSKAckSmcmWVR	Sjc_0034420	125767	21.23	0.0520538	3	1718.75	2.34305	19.7764	2
ILIDckEK	Sjc_0007010	1.79687e+07	16.5	0.294392	2	1060.57	3.6511	37.421	1
IDQNcVVGLAYkLK	Sjc_0200380	1.82133e+08	61.84	8.80486e-06	2	1662.88	-3.34371	39.4848	1
ITScVkSKSLK	Sjc_0066930	4.75735e+07	19.45	0.099881	2	1292.72	-2.93468	44.2789	2
ALcTGEkGYGYK	Sjc_0001030	3.22058e+06	45.5	0.000194739	2	1388.65	-3.15269	29.6991	1
IDcHFkSVINR	Sjc_0083470	1.49016e+06	15.11	0.297528	3	1430.72	-2.77252	32.6114	1
RNckFNPK	Sjc_0043930	1.59889e+06	15.41	0.315075	2	1105.55	-3.96935	24.4994	2
ELAQQHDVDGFLVGGASLKPEFIDIckAR	Sjc_0304690	1.61646e+07	14.76	0.322498	4	3255.63	-3.81498	41.2987	2
HcFQkQLSTK	Sjc_0303480	6.26871e+06	43.46	0.000437292	2	1318.65	-3.79252	26.4053	1
FcTSkYDVTVIDAPGHR	Sjc_0054280	1.22281e+07	31.75	0.00538017	3	2007.95	-4.42575	35.4383	1
NckFNPK	Sjc_0043930	424153	23.78	0.0360162	2	949.459	3.46181	25.6064	1
AcNcLLLkVNQIGSITESIEAcK	Sjc_0209670	4.48843e+07	37.55	0.00201282	3	2663.31	-3.14478	47.0279	1
EYYYQPPTLTcLTPkFcTIYR	Sjc_0009730	2.17823e+07	18.74	0.109601	2	2756.29	-5.69143	44.6895	1
cGGIDkR	Sjc_0054280	222769	19.73	0.073528	2	847.407	-3.03108	22.6413	1
qQGQALDkYAK	Sjc_0207460	9.76623e+06	69.75	1.09633e-06	2	1274.63	-4.09175	32.6115	1
qLHEYkSQANTYNHLLR	Sjc_0012620	1.01186e+07	42.25	0.000735643	3	2140.05	-2.66469	35.2076	1
qLATkAAR	Sjc_0063120	6.39134e+07	33.35	0.00288988	2	883.496	-3.61153	29.7965	1
qEPkSExSPmIK	Sjc_0118380	673040	13.63	0.227593	2	1415.66	-8.57441	27.2263	1
qkQLQQR	Sjc_0112250	1.95409e+06	29.33	0.00927614	2	953.512	-4.1537	26.2396	1
qkYTQSNGR	Sjc_0064130	1.10369e+06	40.68	0.000478837	2	1106.52	-4.88005	25.1674	1
qEGQGRPEDIQGkDFK	Sjc_0064380	0	33.62	0.00369334	2	1856.87	-3.77968	30.6161	2
qckSkVSGPSSGTNNR	Sjc_0090820	1.46101e+07	14.84	0.201779	2	1773.82	2.90316	47.8001	2
sVSSISSkSHDSR	Sjc_0096060	981162	35.19	0.00228532	2	1460.69	-4.38942	28.0878	1
mRkEAVLK	Sjc_0006860	1.04218e+06	16.16	0.262682	2	1058.6	-2.79828	52.8241	2
akSSAKPR	Sjc_0055670	760950	36.43	0.00259361	2	928.516	-5.25503	18.6283	2
acGHVkLIYFNGR	Sjc_0063550	6.54216e+06	39.41	0.00143762	2	1618.81	-4.41799	38.4465	1
WAETAVEYmkQAR	Sjc_0104820	2.94424e+06	15.2	0.184217	2	1640.76	-7.99848	29.7211	1
DILmHYDEkNPLPK	Sjc_0076300	1.10487e+07	33.21	0.00506181	2	1770.87	-3.62787	35.1113	1
LImkVK	Sjc_0004860	3.306e+06	14.68	0.166677	2	789.495	6.28953	36.1766	1
MmmTSGQAVkYK	Sjc_0062310	1.38654e+06	62.03	3.06814e-06	2	1448.65	-3.23352	24.7325	1
ImSYIEkGK	Sjc_0208240	2.55499e+06	16.65	0.166529	2	1126.58	-4.85368	28.8106	1
mmmTSGQAVkYK	Sjc_0062310	1.56255e+06	57.69	8.3344e-06	2	1464.65	-3.81026	23.3448	1
mNPAkYDK	Sjc_0035730	363671	28.14	0.00790328	2	1024.47	-3.57176	22.548	1
mNDLkVSDR	Sjc_0300770	618347	63.82	3.1744e-06	2	1135.54	-4.25944	25.7822	1
mQENAVHIAAAALDkYNVEK	Sjc_0025920	3.11435e+06	24.57	0.0418968	3	2273.11	-4.54627	38.358	1
mSENPISNNVPVkFR	Sjc_0004470	3.55842e+07	35.21	0.00381145	2	1789.88	-3.36805	35.8074	1
mMMTSGQAVkYK	Sjc_0062310	1.33852e+06	60.47	5.24996e-06	2	1432.66	-4.26281	28.7242	1
mYGALQGLNkSETAAK	Sjc_0304750	4.30369e+06	49.04	0.000144696	2	1739.86	-3.58537	32.4962	1
SIGLSNFNkR	Sjc_0217190	2.6277e+06	34.29	0.00441284	2	1177.63	-3.48395	34.5515	1
ADIGDLASkHK	Sjc_0067360	9.04057e+06	43.35	0.000432326	2	1196.62	-4.62029	28.1214	1
VASFGDLGkSAR	Sjc_0200380	2.59058e+06	31.91	0.009115	2	1249.65	-2.62485	33.8832	1
TVQNLLLEkIR	Sjc_0011870	9082859	43.23	0.000232742	2	1368.82	-3.4004	40.7473	1
EAESLLLAkNLNK	Sjc_0035970	1.07493e+07	44.39	0.000314787	2	1484.83	-4.11027	36.7403	1
VVSSGIVDkYIGESAR	Sjc_0072420	3.06517e+06	63.7	5.46022e-06	2	1721.9	-3.26592	37.3705	1
DILMHYDEkNPLPK	Sjc_0076300	6.08205e+07	39.73	0.00117056	2	1754.87	-3.98484	35.9689	1
LLLPGELAkHAVSEGTK	Sjc_0016080	2.30708e+07	56.98	1.50335e-05	2	1805.01	-4.08269	37.6033	1
LADSSTDLkEK	Sjc_0203750	145367	16.79	0.240823	2	1248.62	-9.35554	26.1086	1
IEAIPQIDkYLK	Sjc_0038300	7.90123e+06	20.57	0.0798071	2	1472.83	-5.29166	39.9605	1
LLLEYLEEkYEEHLYER	Sjc_0038300	15916697	24.57	0.0453882	3	2311.14	-3.32329	46.4494	1
ELFLPVYkQMLDAmYK	Sjc_0027600	1.16063e+07	31.41	0.0100465	2	2047.02	-4.69617	46.1752	1
FNDPEVQkDmK	Sjc_0026230	616362	27.78	0.00816347	2	1408.64	-3.53616	27.4244	1
NRIFGQSkPk	Sjc_0076120	291504	17.42	0.225512	2	1258.7	4.01908	23.9132	2
DGDEVVDkK	Sjc_0305830	1.15418e+06	40.84	0.000502724	2	1046.5	-3.78879	24.4768	1
LVSTSFDkK	Sjc_0075160	3.2284e+06	48.27	0.000128085	2	1066.57	-3.3358	29.4251	1
SSVEVAEkGAK	Sjc_0031970	437661	32.69	0.00653998	2	1146.6	-4.48109	24.0167	1
VLTTTTDkHR	Sjc_0013140	304882	28.27	0.0134787	2	1213.65	-3.88497	22.7068	1
IVEVNDQkVK	Sjc_0005410	689545	27.6	0.0145106	2	1213.67	-3.80369	27.1515	1
TPSAIKPkSSPK	Sjc_0078660	1.96978e+06	26.86	0.0108183	2	1282.73	-5.6837	23.2043	2
TVDGPSSkLWR	Sjc_0025800	5.37961e+07	36.37	0.00250282	2	1287.66	-3.69661	35.2414	1
LNSLALHkSFK	Sjc_0301250	3.26205e+06	45.87	0.000226469	2	1299.74	-4.51224	31.6504	1
RLEEEAIkYK	Sjc_0001510	2.39449e+06	37.33	0.00223762	2	1320.71	-3.31103	28.4013	2
GATYDQIkAVIK	Sjc_0025800	3982716	59.49	1.2933e-05	2	1348.74	-4.00335	36.6706	1
NVQEILGkSVEK	Sjc_0044660	3.84873e+06	42.27	0.000637395	2	1385.76	-4.00801	35.3257	1
LITIAGGkWTTYR	Sjc_0104060	9.1206e+06	65.86	2.25694e-06	2	1521.84	-1.27779	39.2596	1
EVLTLLSkYLTPK	Sjc_0030210	27826785	31.45	0.00350651	2	1546.9	-2.85448	46.3449	1
FGEEFDEkTSDGR	Sjc_0200770	2.27696e+07	71.37	3.5717e-07	2	1558.66	-5.08377	33.7631	1
NLFSVAYkNVVGAR	Sjc_0030210	16734685	52.97	4.81952e-05	2	1579.85	-5.40099	43.103	1
IPLQDVYkIGGIGTVPVGR	Sjc_0054280	3.7902e+07	77.99	7.77812e-08	2	2024.15	-3.32086	41.7538	1
NEEEYFYkLQQQQIR	Sjc_0050230	2.96469e+06	42.74	0.000521466	2	2057.98	-4.28185	38.2122	1
ELADFDSkNVIWVEDEKDGYVLANIK	Sjc_0134610	4.72074e+07	40.77	0.000896156	3	3052.5	-3.58124	43.5948	2
VTSSISLkHEK	Sjc_0026360	2.23092e+06	24.1	0.0410443	2	1270.69	-4.85481	25.6101	1
LRDQFDFkTR	Sjc_0055610	1.92904e+07	27.32	0.0187207	2	1367.7	-4.1756	32.1741	2
DSSGGNkFETmDFQK	Sjc_0056420	589201	23.11	0.0239262	2	1748.74	-4.65267	32.7949	1
DELNDMkTK	Sjc_0092100	1.88903e+06	37.57	0.000892422	2	1135.52	-4.578	29.2157	1
LEEEAIkYK	Sjc_0001510	1.16977e+06	35.24	0.00387498	2	1164.61	-5.60223	29.7647	1
YAWVLDkLK	Sjc_0054280	9.02041e+06	32.78	0.0039015	2	1177.66	-2.7542	41.657	1
SVSTSSkYVNGK	Sjc_0201910	605577	29.97	0.00896169	2	1298.65	-4.5807	24.6208	1
LTHELQkFGIK	Sjc_0212050	4.66584e+06	46.59	0.000184196	3	1355.76	-3.01161	34.5592	1
IQDSNLkYQSR	Sjc_0209790	263530	55.32	3.64269e-05	2	1393.7	-4.62594	27.7572	1
TQEEYAkLLAQR	Sjc_0074090	6.31603e+06	51.05	0.000107185	2	1491.77	-4.52562	35.775	1
GGGSANkTFLYQQTK	Sjc_0217510	5.69765e+06	47.2	0.000211506	2	1641.82	-4.75759	32.0922	1
DLKDDLkSDTSGDFR	Sjc_0101450	8.32431e+06	37.42	0.00131322	2	1753.82	-4.71251	36.2004	2
YDSTHGkFQGDVSVENGK	Sjc_0025800	5.26608e+06	54.75	1.64012e-05	2	2009.91	-4.44694	29.3592	1
TPYEQDkHYGEESYNVQNNEK	Sjc_0089450	3.80419e+06	59.62	5.3441e-06	3	2614.12	-3.5174	29.2677	1
LGFINGkIK	Sjc_0096090	3.47131e+07	14.5	0.17373	2	1031.62	-3.11807	37.5999	1
NIDDIDkNR	Sjc_0068410	0	15.73	0.195129	2	1144.56	-3.28224	28.0189	1
HGEAQVkIWR	Sjc_0304750	1.56179e+06	19.39	0.119108	3	1265.67	-3.41982	30.5255	1
SDEWYNkHGGK	Sjc_0042410	754989	16.32	0.114255	2	1362.6	-3.31388	27.3831	1
AASDESkVFLHK	Sjc_0204420	1.42302e+06	19.52	0.139049	2	1373.7	-4.2028	29.8071	1
YGHYAkEcTESGGSGPQcYK	Sjc_0200160	0	26.35	0.0113468	3	2320.95	-4.76085	26.3162	1
AIIAQkYK	Sjc_0211260	6.81923e+06	29.7	0.00524656	2	976.579	-3.99802	28.8964	1
KQLATkAAR	Sjc_0063120	1.02107e+08	48.99	0.000142587	2	1028.62	-4.28681	20.4177	2
DQFDFkTR	Sjc_0055610	1.4755e+07	44.51	0.000221248	2	1098.52	-4.41244	34.8078	1
EHTDFkHR	Sjc_0211970	1.17643e+07	40.11	0.00050212	2	1111.52	-4.14141	20.6758	1
YIHEAkSYK	Sjc_0061560	1.72466e+07	39.22	0.00156175	2	1180.6	-3.56576	24.0786	1
IVHFEkDFLK	Sjc_0089940	10112025	37.12	0.00234847	3	1317.71	-5.54904	36.423	1
SETAAkHGEAQVK	Sjc_0304750	3.57279e+06	44.31	0.000398482	2	1397.7	-3.61258	18.7552	1
LFHWDkPSDSWK	Sjc_0088510	2.31094e+07	26.16	0.0170683	2	1587.75	-3.48207	37.5382	1
YKEIIkEVSGYIK	Sjc_0054280	9.62686e+06	49.75	7.25589e-05	2	1611.89	-4.05642	36.9479	2
DVMSSkHMDSSSTLR	Sjc_0067960	0	40.41	0.000450407	2	1722.77	-3.9054	29.6036	1
SIYGNkFEDESFDNK	Sjc_0001030	1.62864e+07	70.11	4.77391e-07	2	1834.8	-5.40555	36.3415	1
SINDAkR	Sjc_0213210	1.06623e+06	18.58	0.115794	2	845.445	-2.93377	21.2693	1
FEAETkSK	Sjc_0307410	315830	21.41	0.0668562	2	981.485	-3.5856	23.0669	1
KANWEkIK	Sjc_0022610	1.04218e+06	16.16	0.262682	2	1058.6	0.399343	52.8241	2
YPEIHkHR	Sjc_0063550	0	17.18	0.181854	2	1121.58	-3.32555	24.2827	1
IVVEYkGEEK	Sjc_0044680	3.00122e+06	26.68	0.0211561	2	1235.65	-3.7081	29.7151	1
HTEEMkWQAEK	Sjc_0216280	1.31564e+06	17.15	0.0944487	2	1458.66	-3.76302	28.1833	1
NVDIFkHIIPNVVK	Sjc_0054460	6.16267e+07	20.63	0.0432484	2	1677.96	-3.52222	40.6083	1
GLGLkANEmR	Sjc_0305830	602688	18.92	0.171832	2	1146.59	-3.48345	28.7336	1
VVSGkAAkk	Sjc_0016080	941360	28.44	0.010455	2	1013.6	-3.59294	26.9022	2
VVSGkAAkK	Sjc_0016080	3.46416e+06	47	0.000176581	2	971.585	-3.4281	21.2717	2
AAGGkkHTK	Sjc_0058210	390035	38.78	0.00121839	2	981.543	-5.15739	17.5575	2
IIGSkkDQYFLDK	Sjc_0007580	2.6367e+07	58.33	1.52768e-05	2	1638.87	-4.23611	36.8863	2
ALAQkYNcEK	Sjc_0200460	606275	37.09	0.00152438	2	1266.61	-3.90925	26.0623	1
LFVVkLR	Sjc_0029090	7.30068e+06	22.33	0.0286335	2	916.593	-5.20415	40.7181	1
EGFEkISK	Sjc_0215010	2.05072e+06	48.42	0.000135966	2	979.505	-4.20376	29.4508	1
LQQNkLLR	Sjc_0112250	6.22728e+07	33.11	0.00302964	2	1054.63	-4.07954	29.7563	1
LKEEkEIK	Sjc_0131120	1.04218e+06	29.06	0.0134719	2	1058.6	-8.95263	52.8241	2
DAFLkSHGVK	Sjc_0112430	7.17895e+06	35.06	0.00355553	2	1143.61	-4.77366	28.9403	1
TANGkYSVAQVR	Sjc_0300770	6.06318e+06	45.63	0.000332335	2	1335.7	-4.66139	28.5596	1
NEWFkNSVLTK	Sjc_0002330	7.24505e+06	41.66	0.000968921	2	1407.72	-3.47863	38.1699	1
YNIEkDIAAYIK	Sjc_0080420	4.95741e+06	63.74	4.86069e-06	2	1482.78	-4.89445	42.2749	1
ALFEkLNMDLFLK	Sjc_0201800	5.3752e+06	57.94	1.32573e-05	2	1623.88	-3.41291	47.9919	1
RGDVkTMSESLAIAR	Sjc_0063550	0	33.32	0.0059595	2	1675.87	-4.36444	34.4468	2
WSSEkR	Sjc_0073030	507877	15.06	0.272903	2	834.408	-3.32558	23.4359	1
VALHkLR	Sjc_0041560	1.08168e+07	15.57	0.135792	2	878.553	-4.20461	29.2516	1
VFLHkMR	Sjc_0204420	1.60137e+06	22.91	0.0831483	2	972.542	-3.04318	29.4408	1
NQLAkEYR	Sjc_0030210	289012	20.72	0.114376	2	1063.55	-4.10197	26.4613	1
SVVTkDSESK	Sjc_0200770	176914	27.35	0.0198803	2	1121.56	-3.57142	22.7811	1
TALEkLKQLK	Sjc_0212490	8.98042e+07	15.23	0.14685	2	1213.74	-6.23049	44.7766	2
GYGYkNSTFHR	Sjc_0001030	2.57508e+06	21.13	0.0431706	2	1371.64	-4.59552	28.3072	1
EQNIkHSSENST	Sjc_0030630	253321	17.45	0.0880794	2	1415.63	-3.92999	22.4564	1
GSADkFLHSTPVAK	Sjc_0217610	4.01378e+06	16.08	0.260167	3	1499.78	-3.39366	30.6699	1
VVGkSQSSmK	Sjc_0025560	954978	24.62	0.0369304	2	1108.56	-3.67289	18.5262	1
GLGkGGAkR	Sjc_0016100	1.24276e+08	45.06	0.000208966	2	927.534	-3.49338	23.4013	2
TDLkEkLK	Sjc_0090840	1.04218e+06	16.16	0.262682	2	1058.6	-8.94791	52.8241	2
HITkcVDVVDIESIK	Sjc_0074810	3.51778e+06	50.77	9.2547e-05	2	1797.94	-3.19905	35.8972	1
HITkcVDVVDIESIKDK	Sjc_0074810	2.02537e+07	46.87	0.00021998	3	2041.06	-3.34901	34.3969	2
AFNkVAGDDGEIDADELRDILNcAFTR	Sjc_0300430	1.40934e+07	29.53	0.00902579	3	3067.43	-4.01876	46.9057	2
HIAkAIR	Sjc_0014130	2.83935e+07	20.36	0.0450687	2	850.523	-3.27973	29.4215	1
ALYkAMK	Sjc_0212110	3.8103e+06	32.34	0.00428832	2	866.477	-3.89845	28.8982	1
FIVkVLR	Sjc_0089770	7.30068e+06	22.33	0.0286335	2	916.593	-5.20415	40.7181	1
LPEkDMR	Sjc_0036950	1.78268e+06	27.9	0.0106229	2	930.467	-4.55325	26.569	1
LSSkFDVR	Sjc_0035720	1.8885e+07	47.87	0.000185351	2	993.533	-3.43191	31.7657	1
VVGkSQSSMK	Sjc_0025560	706311	42.96	0.000614577	2	1092.57	-4.13518	22.8292	1
FLVkEFQR	Sjc_0026230	2.66517e+07	41.91	0.000557206	2	1108.61	-4.04567	35.8821	1
NAGkSADEMR	Sjc_0070960	1.3871e+06	33.53	0.00217207	2	1120.5	-4.06814	22.952	1
VFGkTYTTPR	Sjc_0304980	2.42083e+06	46.91	0.000195556	2	1211.64	-3.15868	30.975	1
AILkFPSLEAR	Sjc_0214960	1.57612e+07	31.86	0.00495238	2	1286.74	-3.52145	39.8472	1
GSFkYAWVLDK	Sjc_0054280	7.9686e+06	48.3	0.000141255	2	1355.7	-3.02885	41.2998	1
GVLkVFLENVIR	Sjc_0016100	9.35806e+06	50	4.89637e-05	2	1428.85	-2.50476	50.2762	1
NTSkSSEVTENKT	Sjc_0066380	417318	48.22	0.000120529	2	1466.69	-4.08452	22.7251	2
VTEkYTEEEQLNK	Sjc_0044660	5.15802e+06	47.46	0.000165115	2	1652.79	-4.49747	29.2094	1
YNLkQFQDIADSVK	Sjc_0076820	1.67376e+07	61.78	8.09767e-06	2	1710.86	-4.20248	40.2331	1
AFNkVAGDDGEIDADELR	Sjc_0300430	9.6679e+06	78.72	7.92231e-08	2	1976.91	-3.38651	35.8413	1
NIDkFVSEAADLAGDFGNAAR	Sjc_0208800	1.20749e+07	48.15	0.000176075	3	2223.06	-3.40138	47.9212	1
HIPkLK	Sjc_0022470	8.44246e+06	14.56	0.171346	2	777.495	-4.41001	28.9382	1
IGTkHEA	Sjc_0029350	37467.5	13.53	0.217207	2	797.411	-5.07378	19.5747	1
AMEkYK	Sjc_0051340	284539	18.22	0.0986828	2	811.399	-3.51477	23.6981	1
LTFkYER	Sjc_0114080	1.30911e+06	18.4	0.101181	2	998.526	-4.11654	33.7558	1
QKLkVTNR	Sjc_0078270	1.02107e+08	17.58	0.197278	2	1028.62	-3.92106	19.9044	2
VLLkGQFKK	Sjc_0101420	3.75175e+07	14.12	0.189616	2	1102.69	-3.81511	39.0768	2
ELSkNGSILR	Sjc_0000750	5.94406e+06	22.83	0.0656705	2	1158.65	3.14891	46.0312	1
ELSkFAQSVK	Sjc_0095780	1.72319e+06	17.34	0.212177	2	1178.64	-4.32202	31.8679	1
MIQkNTFTR	Sjc_0004380	1.03392e+06	24.35	0.0446248	2	1180.61	-4.79932	30.1872	1
HQYkDAFLK	Sjc_0112430	6.15157e+06	17.35	0.236539	2	1191.61	-3.64261	30.5509	1
GLWkTFGDSR	Sjc_0206920	4.42409e+06	20	0.102	2	1208.6	-4.2617	38.2844	1
LGQkYIHEAK	Sjc_0061560	1.54141e+06	22.44	0.0598672	3	1228.66	-3.02626	25.9863	1
LNNkVKEEPK	Sjc_0021340	314948	16.13	0.171866	2	1240.7	5.79404	24.5021	2
EAMkYAENLTVTHPIR	Sjc_0204420	7.0215e+06	17.69	0.209365	3	1914.97	-4.02065	34.5236	1
VMSkVMPDEIYNLAAQSHVK	Sjc_0074530	4.02901e+07	21.52	0.0909054	3	2302.15	-3.37952	39.3883	1
SGkFmNPTDQAR	Sjc_0216870	1.26346e+06	47.56	0.00010611	2	1409.64	-4.83988	27.8355	1
ELkAmMER	Sjc_0212050	874095	19.06	0.0819491	2	1065.5	-4.39089	27.3784	1
PPkVVSGkAAK	Sjc_0016080	382822	31.02	0.00387146	2	1165.69	-4.69863	25.0502	2
AIkLSDGk	Sjc_0094480	230082	21.23	0.0896493	2	915.511	-3.98511	25.3086	1
GGkGLGkGGAK	Sjc_0016100	3.51524e+07	29.8	0.00895295	2	1013.57	-5.0496	23.4311	2
ASkVkLPK	Sjc_0016080	2.3113e+07	26.76	0.0103246	2	954.594	-4.57957	28.806	2
HGkYIAAIcAAPIALESHK	Sjc_0008070	5.3082e+06	22.15	0.0734492	3	2092.09	-3.98015	35.2561	1
SSkFPYcDGAHNK	Sjc_0074810	1.61839e+07	30.86	0.00401675	2	1552.68	-3.83056	28.3988	1
FGkFIR	Sjc_0054830;Sjc_0035730	2.08682e+06	32.62	0.00267839	2	809.464	-3.65861	34.6045	1
VNkTLDTK	Sjc_0054830	1.88969e+06	33.22	0.00526456	2	960.533	-3.64065	23.9229	1
ELkAMMER	Sjc_0212050	1.56044e+06	33.74	0.00355042	2	1049.51	-3.02209	31.771	1
FFkYNASVAR	Sjc_0300430	7.83616e+06	47.59	0.000216855	2	1244.64	-4.2308	34.3621	1
LPkSVVELYR	Sjc_0302240	1.14127e+07	49.77	6.69536e-05	2	1245.72	-3.7686	36.8755	1
INkYAYSGGGDTVAEHR	Sjc_0030360	3.35168e+06	45.69	0.000272472	2	1879.88	-4.74991	28.845	1
FAkWR	Sjc_0031630	1.03435e+07	17.91	0.0792272	2	749.406	-4.73306	31.5308	1
FVkPVLK	Sjc_0026420	2.59252e+06	14.31	0.181499	2	872.557	-3.88727	32.9138	1
ALkDAEVK	Sjc_0026230	230082	17.32	0.22057	2	915.511	-3.99057	25.3086	1
FVkYLTK	Sjc_0025200	6.28153e+06	20.1	0.0478492	2	940.547	-3.41464	31.8096	1
LNkDPNAR	Sjc_0071850	159021	23.03	0.0400678	2	969.508	-3.57629	22.7958	1
FVkYDEK	Sjc_0042440	1.11573e+06	19.76	0.0533693	2	970.484	-3.68132	27.4796	1
TIkQNVIK	Sjc_0006950	600149	16.31	0.162549	2	985.6	-3.94684	28.3364	1
HLkERLDK	Sjc_0066770	1.51222e+08	16.51	0.165284	2	1080.61	-7.16479	40.2017	2
LSkLPDSNVK	Sjc_0030190	2.12722e+06	20.04	0.0985878	2	1142.65	4.94299	28.5025	1
KGkYDLDFK	Sjc_0209670	4.45187e+06	21.56	0.050971	2	1155.6	-4.29335	31.8076	2
LGkWFVQPR	Sjc_0024390	11726982	17.97	0.174749	2	1172.65	-2.52221	41.264	1
IGkFPISANSR	Sjc_0205700	4.8892e+06	18.24	0.166465	2	1231.67	-4.09385	34.4492	1
ENkTDNEEEK	Sjc_0016040	479149	21.08	0.0381834	2	1277.56	5.45075	25.1457	1
SEkLLGIIVSFGR	Sjc_0041650	9.18722e+07	20.71	0.041579	3	1460.86	6.86317	42.046	1
VQkHQNFEAEIQANQSR	Sjc_0034150	1.10967e+06	20.93	0.0847597	3	2069.01	-4.42591	29.4773	1
APkSNEDVYHFVSYLPINGTLYELDGLKPGPIDHGK	Sjc_0060830	9.21399e+07	20.25	0.0693885	5	4026.01	-3.6222	43.8779	2
YKDGVVLAADLLVSYGSLAkYMDFER	Sjc_0068310	1.19801e+07	44.18	0.000420139	3	2965.5	-1.63075	51.1847	2
MkQQQkQQR	Sjc_0009730	1.46065e+06	41.92	0.000697316	2	1286.66	-4.02638	18.5096	2
GkGGkSR	Sjc_0063110	2.04668e+06	32.16	0.0107336	2	773.422	-5.24994	18.0304	2
GkGGkTR	Sjc_0063130	533314	25.36	0.0531206	2	787.438	-5.26575	18.1573	2
DkTAYcR	Sjc_0074810	1.74247e+06	27.35	0.00901311	2	955.426	-4.21303	23.548	1
GkYDLDFK	Sjc_0209670	1.49401e+07	32.7	0.00295367	2	1027.51	-3.87885	35.7003	1
DkTSLTSPAR	Sjc_0217300	680642	33.5	0.00609723	2	1117.58	-3.22298	26.9335	1
GkSLLEDPDDR	Sjc_0034190	2.57527e+06	45.39	0.000202348	2	1286.62	-4.35987	31.8931	1
AkVIFVLGGPGSGK	Sjc_0212050	9.5897e+07	74.57	2.04247e-07	2	1371.79	-5.1161	38.3796	1
SkYHLQDVIIGK	Sjc_0077550	4.44751e+06	34.09	0.00374344	3	1442.79	-5.28844	35.0074	1
SkFDGTTVYAQNK	Sjc_0034190	1.43637e+07	59.11	1.0556e-05	2	1500.73	-4.87282	30.8738	1
SkFDGTTVYAQNKR	Sjc_0034190	4.25122e+06	46.43	0.000246848	2	1656.83	-4.29399	29.0201	2
GkGAAVR	Sjc_0210890	70165.4	22.01	0.0440654	2	700.407	-4.81357	17.9584	1
SkWLPK	Sjc_0214350	697042	25.01	0.032812	2	800.464	-3.73249	31.7938	1
GkSINDAK	Sjc_0213210	0	19.16	0.182008	2	874.459	-4.65137	21.2933	1
YkSLFGK	Sjc_0211260	2012430	13.3	0.238545	2	884.484	-3.86305	34.8686	1
LkVNETAK	Sjc_0208880	2.28454e+06	17.04	0.218455	2	944.538	-3.27546	23.1368	1
GkFLNILGK	Sjc_0059840	21307775	18.16	0.0747953	2	1031.62	-4.0647	38.3722	1
DkFQNIGAK	Sjc_0215010	2.79787e+06	21.8	0.0921667	2	1062.55	-5.14849	30.6718	1
GkFQEAVNR	Sjc_0086950	1.13712e+06	24.71	0.0412439	2	1090.56	-4.38729	28.7675	1
VkVGTEFVTK	Sjc_0054830	8.64928e+06	25.47	0.021852	2	1149.65	-4.60188	31.4161	1
SkYSDDSTNR	Sjc_0043880	83666.2	15.63	0.133929	2	1214.52	-3.65816	22.5456	1
FkELYADFR	Sjc_0062310	4.78441e+06	14.08	0.293131	2	1230.61	-4.55668	38.1757	1
YkSDETEIEK	Sjc_0044460	812470	20.79	0.0458525	2	1283.59	-5.8409	25.5813	1
VkHNDSSDPETGK	Sjc_0304610	115369	17.22	0.0928698	3	1455.66	-4.92748	18.1403	1
LkIGQQKLMQQK	Sjc_0083080	11413231	21.1	0.0399767	3	1484.86	-0.49074	44.0065	2
YkSNENPWFFHK	Sjc_0011460	1.24998e+07	23.31	0.0328995	3	1638.76	-3.83843	36.1621	1
GLSFAENFLLSGAAAVIAkTAAAPIER	Sjc_0062310	7.05021e+06	14.95	0.15663	3	2730.48	-2.48384	53.2058	1
IGAQALVNSENAEISkQVYAVNFK	Sjc_0200380	1.54092e+07	51.38	6.87752e-05	3	2635.37	-2.84925	40.7435	1
GLYGNIVLSGGSSMFkHLDR	Sjc_0202840	7.08624e+06	21.14	0.0980641	3	2193.1	-3.33032	41.3016	1
ALADHHVYLEGTLLkPNMVTAGQAcK	Sjc_0031630	16857585	44.22	0.000438993	3	2879.44	-3.32459	36.813	1
NQVATNPTNTVFDAkR	Sjc_0044680	3.20053e+06	50.64	0.00011003	2	1817.9	-5.91802	32.8698	1
IEYPDETENAEEVNkHV	Sjc_0032940	3.85789e+06	55.91	1.2566e-05	2	2057.92	-5.7728	34.3081	1
LINQTVFPVTYTEkFYSDVLK	Sjc_0120450	524194574	28.28	0.0141164	3	2547.33	-3.17353	47.4062	1
MSENPISNNVPVkFR	Sjc_0004470	6.7779e+07	33.17	0.00600025	2	1773.89	-4.33819	36.5163	1
VPHNAAVQIYDYkNK	Sjc_0044460	6.27143e+07	70.51	1.21821e-06	2	1801.92	-3.21896	31.6847	1
DNSGNNQDGPPTkFQR	Sjc_0111740	8.11012e+06	33	0.002454	2	1816.81	-5.36736	29.3954	1
VPHNAAVQIYDYkNKR	Sjc_0044460	1.5686e+07	39.2	0.00158098	2	1958.02	-2.86103	30.533	2
YEEHLYERDEGDkWR	Sjc_0038300	7.22277e+06	16.18	0.117998	3	2066.91	-3.63411	30.5924	2
TLHFVVSDVEPkYYADGEDAYAmR	Sjc_0031810	2.55169e+07	34.63	0.00192836	3	2834.28	-5.98859	38.6285	1
YFPTQALNFAFkDK	Sjc_0062310	4.85366e+07	67.93	2.09384e-06	2	1731.86	-5.75274	43.0955	1
INVYYNEASGGkYVPR	Sjc_0060500;Sjc_0090690	5.5139e+06	91.67	7.65866e-09	2	1871.92	-4.98268	35.0687	1
RFDDASVQSDMkHWPFK	Sjc_0044680	4.66249e+07	30.4	0.00652088	3	2135.99	-3.67488	37.4972	2
TLHFVVSDVEPkYYADGEDAYAMR	Sjc_0031810	1.10651e+08	57.21	1.34026e-05	3	2818.29	-3.06236	39.4704	1
EAAESSLLAYkEAMK	Sjc_0204420	7.59523e+06	44.76	0.000310801	2	1682.82	-4.29899	39.01	1
LLVQNQDEMIkQGR	Sjc_0062310	896960	36.48	0.0026089	2	1713.89	-3.56414	33.8477	1
FDDASVQSDMkHWPFK	Sjc_0044680	3.72244e+07	32.21	0.00294357	2	1979.89	-4.39712	39.3602	1
LGLIPLAVDPkYFLFPTR	Sjc_0014050	7.5042e+06	41.28	0.000364649	2	2102.19	-5.72621	51.743	1
FVLANHQDLLkAIR	Sjc_0089940	5.96906e+06	16.12	0.119639	3	1679.96	-1.03196	37.7492	1
DSIPPLIVFAkDGHYALSDLSK	Sjc_0084260	2.72493e+07	23.87	0.0434816	2	2428.27	-4.33554	47.0282	1
SLHDALLVVkR	Sjc_0082530	1.89893e+07	32.42	0.00280462	2	1292.76	-4.30802	35.3521	1
MMMTSGQAVkYK	Sjc_0062310	5.78686e+06	61.28	4.61734e-06	2	1416.66	-5.22917	30.5968	1
IEEELGSTAkYAGK	Sjc_0209670	1.42758e+07	67.89	1.71495e-06	2	1537.77	-5.34109	30.6363	1
FHDKPFNQGkIFK	Sjc_0042030	4.32039e+06	46.46	0.000289208	2	1647.86	-3.82226	31.3724	2
MYGALQGLNkSETAAK	Sjc_0304750	6.53977e+06	56.43	3.03726e-05	2	1723.86	-3.52349	34.9308	1
WMDNNQLAEkEEFEEK	Sjc_0044680	4908235	70.47	4.39415e-07	2	2081.91	-3.17071	37.2428	1
FDEFEISGSkYAPEGIVYHHGR	Sjc_0047360	15950147	45.78	0.000183647	3	2580.21	-3.82363	36.6216	1
TSEAPSSTGkSGK	Sjc_0010800	189719	21.17	0.0656899	2	1278.61	-4.31278	18.4478	1
kLYIRHNImSLSPR	Sjc_0301740	0	19.43	0.0803876	2	1786	9.29224	46.1237	2
kHNmmGDTDDEYYIIEK	Sjc_0063550	4.63607e+09	73.1	2.39814e-07	3	2175.91	-6.81749	34.1389	1
kHNmMGDTDDEYYIIEK	Sjc_0063550	8.55589e+09	58.98	6.19262e-06	3	2159.91	-5.46389	35.9601	1
kGNTSTASkR	Sjc_0112250	495282	62.71	6.67067e-06	2	1133.59	-4.61398	18.3341	2
kKIVQEGGk	Sjc_0100090	1.37023e+09	19.52	0.116712	2	1070.63	6.53608	24.6926	2
kFIPITTk	Sjc_0208630	3.47131e+07	13.16	0.236524	2	1031.62	7.78224	37.5999	1
kSTGGkAPR	Sjc_0063120	7.50168e+07	46.31	0.000215173	2	985.539	-3.45006	19.3595	2
kQLATkAAR	Sjc_0063120	1.37023e+09	53.33	4.85418e-05	2	1070.63	-3.9531	24.6926	2
kGGARk	Sjc_0074160	70165.4	21.18	0.0533455	2	700.407	-4.80643	17.9584	2
kLNLkIR	Sjc_0004190	1.67124e+07	29.8	0.00512713	2	968.622	-3.71941	39.6799	2
kGGkGSk	Sjc_0200920	533314	22.97	0.0921007	2	787.438	9.00204	18.1573	2
kNkVANk	Sjc_0086650	1.24276e+08	15	0.211873	2	927.534	8.64095	23.4013	2
kVkLPK	Sjc_0016080;Sjc_0036390	4.85798e+06	16.67	0.105408	2	796.526	-3.80614	26.8612	2
kFDDVAcK	Sjc_0304610	374524	25.02	0.0162109	2	1024.47	-3.58054	27.6174	1
kHVcNDDGSVLVVSK	Sjc_0310070	3.61405e+06	51.49	6.74099e-05	2	1698.84	-4.21016	28.2006	1
kYcTVVR	Sjc_0213900	272335	25.09	0.0243147	2	967.498	-5.24955	25.8311	1
kWGTDESK	Sjc_0211260	735431	38.19	0.00089506	2	992.464	-4.51554	25.8334	1
kFAPLFDR	Sjc_0307410	2.18626e+07	41.61	0.000672984	2	1035.56	-3.24541	38.1535	1
kHLEDEHER	Sjc_0050230	1.53655e+06	35.32	0.00152758	2	1234.58	-4.27923	18.9924	1
kYQSVTGGIQR	Sjc_0035730	1.58315e+06	29.96	0.0135745	2	1278.68	-3.92584	27.5279	1
kHSQFINYPIK	Sjc_0044660	6.88498e+06	37.53	0.00222521	2	1416.76	-2.99517	31.6867	1
kHAETELEETQSR	Sjc_0027340	581891	44.57	0.000281058	2	1599.76	-2.85734	23.8357	1
kYADSQAELENAQR	Sjc_0054830	2.09659e+06	69.15	8.69573e-07	2	1664.78	-3.80877	28.3388	1
kHNMMGDTDDEYYIIEK	Sjc_0063550	2.15128e+10	85.37	1.42192e-08	2	2143.92	-4.08383	35.7301	1
kHNMMGDTDDEYYIIEKMIGQVEDVESEYHK	Sjc_0063550	0	23.01	0.0244836	4	3788.66	-3.78871	46.8751	2
kFEELK	Sjc_0044660	1.36219e+06	20.87	0.0695695	2	835.452	-5.18108	29.3423	1
kLVGSLPK	Sjc_0015400	4.42088e+06	13.22	0.233278	2	883.558	-3.97429	27.9756	1
kTSMFPR	Sjc_0051950	869884	21.3	0.064494	2	908.469	3.46235	28.6615	1
kHDALER	Sjc_0034150	105615	18.49	0.122466	2	910.47	-4.60096	21.0935	1
kIDGALNR	Sjc_0035630	760950	20.69	0.0972534	2	928.516	-5.26042	18.6283	1
kLQFTPR	Sjc_0009930	3.28901e+06	16.42	0.250838	2	931.535	-0.872164	34.2997	1
kYEIPVPK	Sjc_0111950	544482	23.28	0.0556825	2	1015.58	-4.24074	33.7607	1
kHAEYESR	Sjc_0092100	371404	13.3	0.240884	2	1061.5	-3.61406	18.5854	1
kFYEQFSK	Sjc_0044660	1.24817e+06	17.97	0.134852	2	1118.55	-5.92265	33.5671	1
kYLTDDIVNK	Sjc_0200590	0	18.52	0.140605	2	1250.66	-5.14826	33.7484	1
kFVDLPSKDEK	Sjc_0104290	781802	24.02	0.0453738	2	1347.71	-4.27533	29.7011	2
TENDISVTcGGkHDTNLGR	Sjc_0200380	1.6657e+06	37.57	0.00105866	3	2115.96	-3.55458	28.234	1
VKIDQNcVVGLAYkLK	Sjc_0200380	2.00771e+07	62.43	4.17179e-06	2	1890.05	-3.10271	37.7086	2
RLSDLckVLK	Sjc_0082570	5.76481e+06	16.68	0.206192	3	1273.72	-4.92804	36.4286	2
TSGTcAHkLFER	Sjc_0204960	562229	24.01	0.0379318	2	1448.69	-2.87482	29.0832	1
VTQEcQkLQYR	Sjc_0093720	394336	35.65	0.00243682	2	1494.73	-4.48783	29.0663	1
IDQNcVVGLAYkLK	Sjc_0200380	1.33908e+08	29.65	0.0155002	3	1662.88	-3.09487	39.3244	1
ITScVkSKSLK	Sjc_0066930	4.58333e+07	18.45	0.125743	2	1292.72	-2.84025	44.0661	2
ALcTGEkGYGYK	Sjc_0001030	3.67083e+06	49.27	6.44758e-05	2	1388.65	-4.38338	29.2225	1
IDcHFkSVINR	Sjc_0083470	1.8733e+06	27.98	0.0158425	3	1430.72	-3.86036	31.7077	1
HcFQkQLSTK	Sjc_0303480	4.37566e+06	40.88	0.000800251	2	1318.65	-4.71825	25.9815	1
AcNcLLLkVNQIGSITESIEAcK	Sjc_0209670	4.43745e+07	51.88	7.26471e-05	3	2663.31	-3.41979	46.722	1
cGGIDkR	Sjc_0054280	108402	17.49	0.108725	2	847.404	-5.47998	22.7301	1

## Sheet: 28dpi-male
Supplementary Table S1. Identified Peptides and Proteins from 28dpi male worms. The table indicates the name of the identified protein, the sequence of the observed peptide, number of miscleavages and the charge states that were observed.
Sequence	Protein Accessions	Area	IonScore	Exp Value	Charge	MH+ [Da]	ΔM [ppm]	RT [min]	# Missed Cleavages
qLLFSADHkLAQNISGVILFEETLHQK	Sjc_0031630	1.37882e+07	42.26	0.000359547	3	3104.63	-2.65453	49.8954	1
qREQNIkHSSENST	Sjc_0030630	310941	17.91	0.0840377	2	1682.77	-2.92694	22.7578	2
qkYTQSNGR	Sjc_0064130	2.4695e+06	45.47	0.000158923	2	1106.52	-4.65941	25.4282	1
qLEGDKYDWEEkLR	Sjc_0026420	8.68955e+06	27.91	0.0120547	2	1833.86	-3.61808	40.4986	2
qLVEDHFLFkNDDPVLR	Sjc_0200590	4.57421e+07	49.52	0.000127881	2	2110.04	-7.46523	43.8858	1
mLELSEkGR	Sjc_0046490	2.39896e+07	23.63	0.0437846	2	1162.57	-9.34351	24.2574	1
mkPSmEEIK	Sjc_0102250	5.05213e+06	22.8	0.0272568	2	1208.55	-3.78087	28.6758	1
mESQEDANTHDVkNTDTR	Sjc_0088660	57579.3	28.22	0.00782482	2	2190.91	-2.91029	25.8628	1
mDPSDPDFkYLGVDRK	Sjc_0134610	1.08921e+07	31.04	0.00546997	2	1966.91	-3.62242	40.0913	2
mESVAAHkDEVAPVESK	Sjc_0211620	9.92605e+06	79.25	1.13502e-07	2	1910.91	-3.75316	34.413	1
sVSSISSkSHDSR	Sjc_0096060	608888	16.94	0.149703	2	1460.69	-4.13871	28.0158	1
sSFLGkWK	Sjc_0200770	32174628	39.11	0.00129495	2	1036.54	-4.88741	44.0567	1
qKLkVTNR	Sjc_0203960	1.37332e+09	16.51	0.236759	2	1070.63	-3.14563	24.4361	2
mRkEAVLK	Sjc_0006860	1.72721e+06	16.35	0.254913	2	1058.6	-0.492016	52.4725	2
acGHVkLIYFNGR	Sjc_0063550	4.08412e+07	59.15	1.52631e-05	2	1618.81	-3.5131	38.5606	1
SLVTDmkK	Sjc_0064950	1.73622e+06	20.38	0.0893315	2	979.509	-4.34682	24.7436	1
DILmHYDEkNPLPK	Sjc_0076300	2.72496e+07	28.5	0.015326	2	1770.87	-3.28321	34.7782	1
AGmSEDDYkK	Sjc_0210540	1.46645e+06	28.58	0.00720235	2	1201.5	-4.87948	21.9958	1
LImkVK	Sjc_0004860	2.84768e+06	15.27	0.154338	2	789.495	5.9803	35.8659	1
RDmVNYILHDkR	Sjc_0030180	3.12267e+07	17.3	0.22345	2	1617.83	9.53594	40.1335	2
FmDSTNTkFNR	Sjc_0304610	1.33117e+06	31.47	0.00370232	2	1418.63	-3.57229	28.9209	1
ImSYIEkGK	Sjc_0208240	5.86265e+06	29.28	0.00902945	2	1126.58	-3.77012	28.5576	1
NmVLSkR	Sjc_0099930	4.04157e+07	18.28	0.134477	2	905.496	9.49418	40.5296	1
ImRPkHIR	Sjc_0056990	1.59203e+06	14.68	0.176797	2	1108.65	5.01387	42.22	2
MmMTSGQAVkYK	Sjc_0062310	1.30713e+06	77.43	9.8491e-08	2	1432.66	-4.60363	28.6803	1
YPIEHGIVTNWDDmEkIWHHTFYNELR	Sjc_0002370;Sjc_0042620	1.90632e+07	19.48	0.0665046	3	3501.64	2.04936	44.2503	1
AELDDAHNQVDSImkAK	Sjc_0054830	1.78497e+06	46.65	0.000181668	2	1942.91	-3.67146	29.1092	1
RFDDASVQSDmkHWPFK	Sjc_0044680	1.72395e+07	21.95	0.033828	3	2151.98	-3.44017	34.7006	2
FDDASVQSDmkHWPFK	Sjc_0044680	1.56823e+07	24.86	0.0169619	3	1995.88	-3.96151	36.5157	1
mmmTSGQAVkYK	Sjc_0062310	512191	37.08	0.00101736	2	1464.65	-3.81026	22.6854	1
mkTmDGTSEK	Sjc_0083490	1.46645e+06	22.69	0.0279559	2	1201.5	-7.69679	21.9958	1
mQENAVHIAAAALDkYNVEK	Sjc_0025920	1.23598e+07	56.23	2.87069e-05	3	2273.11	-4.46571	38.4751	1
mIGQVEDVESEYHkTLmKPPEEK	Sjc_0063550	6.42569e+06	16.03	0.200815	3	2791.31	-2.9239	32.4189	2
mSENPISNNVPVkFR	Sjc_0004470	3.06515e+07	51.86	7.13533e-05	2	1789.88	-4.66386	35.6117	1
mIVDSTSLLRkEk	Sjc_0061010	2.12379e+07	19.05	0.139386	3	1619.87	4.09307	38.7352	2
mYGALQGLNkSETAAK	Sjc_0304750	3.97384e+06	57.62	2.08443e-05	2	1739.86	-2.74344	32.6381	1
mGckFcR	Sjc_0015060	360418	21.14	0.0399461	2	1016.41	-5.21444	25.698	1
mNPAkYDK	Sjc_0035730	1.59432e+06	19.94	0.0526592	2	1024.47	-3.57176	21.6572	1
KAEPISWSkLEYcK	Sjc_0303290	0	31.81	0.00843743	2	1780.89	-4.21148	35.1919	2
NQDGNTYSkTASPINYK	Sjc_0302990	2.79788e+06	94.34	3.07388e-09	2	1942.91	-3.54219	30.825	1
LLLPGELAkHAVSEGTK	Sjc_0016080	2.6554e+07	73.4	3.1082e-07	2	1805.01	-3.8798	37.7403	1
LLLEYLEEkYEEHLYER	Sjc_0038300	1.02512e+08	62.98	6.46998e-06	2	2311.14	-3.63438	46.2926	1
TVQNLLLEkIR	Sjc_0011870	1.97639e+07	48.48	7.37011e-05	2	1368.82	-4.20302	40.8058	1
EAESLLLAkNLNK	Sjc_0035970	1.04066e+07	41.62	0.000664549	2	1484.82	-4.85018	37.0313	1
DILMHYDEkNPLPK	Sjc_0076300	2.41622e+08	35.94	0.00281425	2	1754.87	-4.33265	35.8554	1
ADIGDLASkHK	Sjc_0067360	5.47381e+06	33.8	0.00385604	2	1196.62	-4.00821	27.8565	1
IEAIPQIDkYLK	Sjc_0038300	8.19334e+07	29.19	0.0100018	2	1472.83	-3.96555	40.2017	1
TTLVSHFSkK	Sjc_0093470	1.84576e+06	22.47	0.0690812	2	1189.65	-4.05895	28.2366	1
EADENPGkkK	Sjc_0009730	186760	17.04	0.142342	2	1199.58	-4.63236	20.4976	2
IPLQDVYkIGGIGTVPVGR	Sjc_0054280	1.43871e+08	97.27	9.7381e-10	2	2024.14	-4.82854	41.4856	1
FGEEFDEkTSDGR	Sjc_0200770	5.96813e+07	83.26	2.45174e-08	2	1558.66	-3.75237	33.4838	1
GATYDQIkAVIK	Sjc_0025800	7.11861e+06	77.25	2.00609e-07	2	1348.74	-2.91726	37.0055	1
NLFSVAYkNVVGAR	Sjc_0030210	6.77069e+07	69.75	9.95699e-07	2	1579.86	-2.15577	42.7108	1
ELADFDSkNVIWVEDEK	Sjc_0134610	1.67708e+07	68.04	1.27985e-06	2	2078.98	-5.07341	41.4559	1
ELADFDSkNVIWVEDEKDGYVLANIK	Sjc_0134610	2.77128e+08	66	2.75052e-06	3	3052.51	-3.10136	43.0235	2
SSNMPWYkGWEITR	Sjc_0054280	9.0324e+06	54.81	2.44473e-05	2	1796.84	-3.10247	42.4602	1
LNSLALHkSFK	Sjc_0301250	8.36524e+06	49.33	0.000106763	2	1299.74	-3.8548	31.5745	1
ELFLPVYkQMLDAMYK	Sjc_0027600	6.18247e+07	46.06	0.000298529	2	2031.03	-2.7291	49.8937	1
NVQEILGkSVEK	Sjc_0044660;Sjc_0044670	5.23084e+06	45.55	0.000303687	2	1385.76	-3.2152	35.0107	1
VTSSISLkHEK	Sjc_0026360	6.12064e+06	43.55	0.000434947	2	1270.7	-3.99021	25.917	1
DLTDYLMkILTER	Sjc_0002370;Sjc_0042620	2.27199e+06	41.67	0.000905423	2	1652.85	-2.34119	53.0801	1
YSHLAWTkQDR	Sjc_0095720	1.5811e+06	41.44	0.000606536	2	1446.71	-4.82777	30.039	1
SSVEVAEkGAK	Sjc_0031970	953391	39.74	0.00132712	2	1146.6	-3.20353	23.2841	1
EVLTLLSkYLTPK	Sjc_0030210	1.0471e+08	38.39	0.000752444	2	1546.9	-3.64361	46.2603	1
LVSTSFDkK	Sjc_0075160	5.45719e+06	38.32	0.00128827	2	1066.57	-3.67916	29.1711	1
QQGQALDkYAK	Sjc_0207460	8.73434e+06	36.6	0.00301911	2	1291.66	-5.31266	27.5073	1
TPSAIKPkSSPK	Sjc_0078660	1.24539e+07	34.97	0.00165578	2	1282.73	-4.3514	22.1811	2
RLEEEAIkYK	Sjc_0001510	2.91688e+06	33.75	0.0056929	2	1320.71	-4.05046	28.0064	2
TVDGPSSkLWR	Sjc_0025800	1.24791e+08	32.74	0.0058798	2	1287.67	-1.70581	34.762	1
LYHLPEVkYTQLFINNEFVDSK	Sjc_0208240	3.44507e+06	30.86	0.00721909	3	2739.4	-2.31684	43.5607	1
LLLDEQEkYHR	Sjc_0304010	0	30.69	0.011005	2	1485.78	7.00682	31.3459	1
LRDQFDFkTR	Sjc_0055610	6.14769e+07	28.94	0.0118709	3	1367.7	-3.18134	32.1589	2
EAFSLFDkDGDGTITTK	Sjc_0211700	0	25.67	0.0195134	2	1886.89	-6.08294	40.5875	1
IVEVNDQkVK	Sjc_0005410	3.67138e+06	24.81	0.0269251	2	1213.67	-4.00485	26.8796	1
VELAEAVkHK	Sjc_0012620	439872	24.6	0.0201107	2	1165.65	-4.99746	27.3341	1
VLTTTTDkHR	Sjc_0013140	505256	20.17	0.0875067	2	1213.65	-3.38206	21.6046	1
WNTANILkIQR	Sjc_0028220	1.32885e+07	18.86	0.111815	3	1398.78	-3.95955	30.5984	1
DGDEVVDkK	Sjc_0305830	1.96067e+06	13.86	0.242578	2	1046.49	-5.07191	24.1106	1
LLQETPkEVPWLcK	Sjc_0076480	1.26613e+07	35.6	0.00326376	2	1782.94	-4.50744	39.8809	1
GGGSANkTFLYQQTK	Sjc_0217510	5.32037e+06	80.89	9.32836e-08	2	1641.82	-3.79103	32.1322	1
HATDPAkYWTYGVNGVSGR	Sjc_0000730	1.75651e+07	71.59	7.35031e-07	2	2121.01	-2.85696	36.3638	1
YDSTHGkFQGDVSVENGK	Sjc_0025800	1.03005e+07	61.3	3.85012e-06	2	2009.91	-3.6574	29.1308	1
YDSEPDkWIKPHVVSK	Sjc_0202840	4.16775e+06	55.62	3.61888e-05	2	1969.99	-4.956	31.7373	2
EIAQDFkTDLR	Sjc_0063120	1.45509e+07	54.06	5.26144e-05	2	1377.7	-3.42725	36.289	1
DLKDDLkSDTSGDFR	Sjc_0101450	1.64641e+07	52.81	3.71756e-05	2	1753.82	-4.4341	36.5084	2
SVSTSSkYVNGK	Sjc_0201910	1.01674e+06	50.2	8.92918e-05	2	1298.65	-3.73472	24.3219	1
LTHELQkFGIK	Sjc_0212050	1.81655e+07	47.02	0.000175769	3	1355.76	-3.21419	33.9804	1
FYEQFSkNIK	Sjc_0044660	9.90639e+06	43.77	0.000388277	2	1345.67	-3.14357	34.6291	1
IQDSNLkYQSR	Sjc_0209790	408741	41.33	0.000931302	2	1393.7	-4.01283	27.4724	1
YAWVLDkLK	Sjc_0054280	1.20084e+07	40.97	0.000539888	2	1177.66	-3.99807	41.4633	1
HGEAQVkIWR	Sjc_0304750	3.74561e+06	40.43	0.000923847	2	1265.67	-4.8318	30.3461	1
SVAEFEkLNR	Sjc_0014710	5.4011e+06	37.99	0.00204923	2	1234.64	-3.31182	33.9542	1
ALSLVEkYHR	Sjc_0211030	6.89252e+06	36.16	0.00272366	2	1257.69	-4.40139	31.9515	1
SNYNFEkPFLWLAR	Sjc_0071910	0	34	0.00461804	2	1826.92	-1.31629	46.9439	1
SYWGAGkHR	Sjc_0058270	3.21166e+06	33.4	0.00297107	2	1103.53	-3.7635	26.478	1
KLIVVPkSVTFK	Sjc_0217190	4.36614e+06	32.38	0.00300244	2	1400.88	-3.91798	35.0183	2
INFHFEkNEWFK	Sjc_0002330	1.92566e+07	32.32	0.00571485	3	1680.81	-3.14529	40.2348	1
ETNELGkYR	Sjc_0017310	4.40275e+06	30.34	0.00679653	2	1151.56	-4.05151	28.2557	1
DELNDMkTK	Sjc_0092100	2.25221e+06	30.15	0.00501735	2	1135.52	-5.65301	29.0493	1
LYRPVSkLDSK	Sjc_0023880	2.84747e+06	27.78	0.0135047	2	1347.76	-3.90738	28.9277	2
LEEEAIkYK	Sjc_0001510	972417	24.3	0.0481138	2	1164.61	-5.49741	29.7531	1
EVSGYIkK	Sjc_0054280	1.07263e+06	24.19	0.0272462	2	965.527	-3.28331	26.637	1
LQATLSkYK	Sjc_0214220	1.24475e+06	23.96	0.0208677	2	1093.62	-3.50287	29.9448	1
SLVTDMkK	Sjc_0064950	4.66912e+06	20.62	0.0914645	2	963.515	-3.48858	31.7174	1
SPNAEEkFK	Sjc_0094860	298407	20.4	0.0720489	2	1091.53	-3.49024	27.2442	1
EVAHDSkYTGR	Sjc_0035040	541917	14.12	0.286571	3	1304.62	-3.95847	21.749	1
TSLGPkGmDK	Sjc_0013990	2.0334e+06	17.5	0.140484	2	1091.54	-4.6902	22.8585	1
YGHYAkEcTESGGSGPQcYK	Sjc_0200160	2.59016e+06	71.57	3.61805e-07	3	2320.95	-4.28749	26.4388	1
DNHSAkYcDK	Sjc_0028170	182199	30.12	0.00505213	2	1279.53	-5.86123	20.121	1
VPHTMkEMFcMNPNR	Sjc_0301250	8970966	16.42	0.118433	3	1933.85	-3.87235	36.8753	1
SIYGNkFEDESFDNK	Sjc_0001030	3.46241e+07	80.78	4.33984e-08	2	1834.81	-3.60922	36.6798	1
LPEMLkMFEDR	Sjc_0038300	3.02284e+07	69.51	1.04108e-06	2	1450.7	-4.05245	44.1427	1
DFETLkVDFLSK	Sjc_0038300	5.30731e+06	69.27	1.20079e-06	2	1483.76	-3.02	47.2775	1
YKEIIkEVSGYIK	Sjc_0054280	1.82531e+07	58.01	1.08315e-05	2	1611.89	-4.5108	37.2465	2
YPEIHkHR	Sjc_0063550	9.021e+07	51.51	7.84012e-05	2	1121.58	-4.08742	22.9582	1
EHTDFkHR	Sjc_0211970	8.8777e+07	45.29	0.000153629	2	1111.52	-3.92176	20.1159	1
TQGAIkYTR	Sjc_0303480	3.52424e+06	43.75	0.000442781	2	1079.58	-4.08737	26.0074	1
HTEEMkWQAEK	Sjc_0216280	1.43438e+06	43.15	0.000251463	2	1458.66	-3.34458	27.7206	1
KQLATkAAR	Sjc_0063120	1.28994e+08	42.13	0.000688894	2	1028.62	-3.57476	19.8765	2
SETAAkHGEAQVK	Sjc_0304750	2.613e+06	40.91	0.000871783	2	1397.7	-3.78725	19.834	1
SIYGNkFEDESFDNKHDK	Sjc_0001030	2.37111e+06	38.08	0.000808117	2	2214.99	-3.94643	31.9912	2
DQFDFkTR	Sjc_0055610	2.95727e+07	37.52	0.00108862	2	1098.52	-3.30121	34.3748	1
YIHEAkSYK	Sjc_0061560	3.56139e+07	36.14	0.00294297	2	1180.6	-3.97935	23.174	1
VDFLSkLPEMLK	Sjc_0038300	2.08044e+07	34.66	0.00367628	2	1461.8	-3.14084	47.1142	1
IVVEYkGEEK	Sjc_0044680	6.68913e+06	34.28	0.00376983	2	1235.65	-3.90568	29.6986	1
AIIAQkYK	Sjc_0211260	1.08461e+07	28.27	0.00773525	2	976.579	-3.37303	28.5086	1
SINDAkR	Sjc_0213210	3.9457e+06	27.86	0.0136674	2	845.445	-2.5728	20.8316	1
LFHWDkPSDSWK	Sjc_0088510	4.33551e+07	26.84	0.014905	2	1587.75	-2.867	37.9586	1
MIQLPkSIENNQLK	Sjc_0300100	4.05671e+06	23.66	0.0419763	2	1697.92	-4.00345	37.3015	1
KANWEkIK	Sjc_0022610	1.72721e+06	18.58	0.152543	2	1058.6	2.7056	52.4725	2
VLSSRkDIR	Sjc_0207570	5.81746e+06	17.67	0.129961	3	1115.65	0.150732	34.4762	2
DSFVQkAK	Sjc_0035030	9.4577e+06	16.13	0.236468	2	964.507	-2.77612	30.3039	1
ILAHEkSLR	Sjc_0020330	1.59203e+06	13.26	0.245174	2	1108.65	-0.862671	42.22	1
FIARkHNMmGDTDDEYYIIEK	Sjc_0063550	3.68211e+07	69.88	6.5279e-07	3	2647.21	-4.32716	33.3774	2
GLGLkANEmR	Sjc_0305830	0	28.47	0.0187747	2	1146.59	-4.01577	28.3876	1
YIADkHNmLGGcPK	Sjc_0038300	2.13742e+07	56.48	1.49562e-05	2	1661.77	-3.95583	26.308	1
VVSGkAAkK	Sjc_0016080	4.06715e+06	33.73	0.00374924	2	971.586	-2.67426	20.8529	2
IIGSkkDQYFLDK	Sjc_0007580	4.47439e+06	35.99	0.00261838	2	1638.87	-3.71471	37.2697	2
YIADkHNMLGGcPK	Sjc_0038300	4.73064e+07	64.38	2.95451e-06	2	1645.78	-4.26547	30.5047	1
FDVEkDVAAFIK	Sjc_0025950	7.63372e+06	62.44	6.2433e-06	2	1423.74	-2.71733	43.5269	1
ALFEkLNMDLFLK	Sjc_0201800	5.58493e+06	61.97	5.71798e-06	2	1623.87	-4.08946	48.0912	1
IAYSkDFETLK	Sjc_0038300	4.08513e+07	59.67	1.17066e-05	2	1356.7	-2.67632	35.4146	1
VASEkYAK	Sjc_0026090	3.66021e+06	52.69	4.35999e-05	2	937.495	-4.17451	21.5315	1
YNIEkDIAAYIK	Sjc_0080420	8.51289e+06	46.76	0.000221406	2	1482.78	-2.75398	42.243	1
FIARkHNMMGDTDDEYYIIEK	Sjc_0063550	1.60765e+08	44.39	0.000216529	3	2631.21	-3.40965	34.8654	2
SEIVkHVASYGTGR	Sjc_0214870	1.05436e+06	41.17	0.00107319	2	1545.8	-2.99225	28.722	1
TANGkYSVAQVR	Sjc_0300770	4.35493e+06	39.65	0.00136575	2	1335.7	-3.5647	28.2889	1
RGDVkTMSESLAIAR	Sjc_0063550	8.92364e+06	38.77	0.00169906	2	1675.87	-4.07308	33.8863	2
VFLHkMR	Sjc_0204420	4.38219e+06	34.9	0.00478919	2	972.541	-3.48249	28.7551	1
LKEEkEIK	Sjc_0131120	1.72721e+06	32.55	0.00611495	2	1058.6	-6.64636	52.4725	2
EMIQkYPIVSIEDPFDQDDWDAWPK	Sjc_0209670	9.73007e+06	30.05	0.00513422	3	3107.42	-3.85137	49.2375	1
QLATkAAR	Sjc_0063120	7.55554e+06	29.96	0.015492	2	900.523	-3.81292	21.9549	1
DAFLkSHGVK	Sjc_0112430	4.54474e+06	29.57	0.0125865	2	1143.61	-3.81299	28.5624	1
SVVTkDSESK	Sjc_0200770	698455	28.57	0.0150115	2	1121.56	-4.00678	21.9303	1
EQNIkHSSENST	Sjc_0030630	956220	28.44	0.00743831	2	1415.63	-3.92999	21.4159	1
DEGDkWR	Sjc_0038300	1.09388e+07	27.89	0.00844256	2	947.419	-3.27053	29.4723	1
EIYDkYGEDGLK	Sjc_0094860	3.57673e+06	27.47	0.0114599	2	1471.69	-5.75747	34.2524	1
KVDLkNMAK	Sjc_0082530	2.74593e+06	25.89	0.0292412	2	1088.61	-4.80106	27.5141	2
LQQNkLLR	Sjc_0112250	6.92653e+07	25.78	0.0163829	2	1054.63	-3.84804	29.5555	1
NEALkHR	Sjc_0078530	437825	25.09	0.0246245	2	909.487	-3.72118	19.8365	1
VFYLkMK	Sjc_0092590	2308091	24.86	0.022208	2	970.541	-1.82263	36.9488	1
GKELkAMMER	Sjc_0212050	4.85213e+06	24.71	0.0360039	2	1234.62	-5.02857	29.8497	2
LFVVkLR	Sjc_0029090	1.02292e+07	22.56	0.0288054	2	916.596	-2.14104	40.7121	1
VALHkLR	Sjc_0041560	7.43763e+07	19.92	0.0529023	2	878.553	-4.13514	28.3811	1
FLITkK	Sjc_0065020	3.20372e+06	19.55	0.0576069	2	791.5	-3.13034	37.5352	1
LKVEkSR	Sjc_0006130	1.52105e+07	19.38	0.122843	2	901.543	-3.75672	32.0962	2
GSSDkYASEDSR	Sjc_0207030	157474	18.23	0.0780682	2	1343.57	-3.76664	22.4769	1
LIINkGIK	Sjc_0108350	5.03471e+06	17.02	0.103151	2	940.616	-3.46161	40.2366	1
LGANkQIIR	Sjc_0007400	6.92653e+07	15.37	0.180049	2	1054.63	-3.85752	29.5555	1
APDNkSDR	Sjc_0211170	3.13531e+07	15.13	0.159395	2	944.45	6.76188	42.2028	1
VVGkSQSSmK	Sjc_0025560	2.38533e+06	57	2.13493e-05	2	1108.56	-4.00324	19.7198	1
NAGkSADEmR	Sjc_0070960	596119	35.64	0.00141734	2	1136.5	-3.40334	19.538	1
ALYkAmK	Sjc_0212110	2.34517e+06	17.94	0.117307	2	882.471	-4.49781	23.4696	1
GLGkGGAkR	Sjc_0016100	1.37431e+08	48.12	0.000103294	2	927.533	-4.21722	22.6348	2
AIVkLVk	Sjc_0037600	1.94315e+07	16.41	0.118706	2	854.579	9.66549	39.5895	1
TDLkEkLK	Sjc_0090840	1.72721e+06	18.58	0.152543	2	1058.6	-6.64164	52.4725	2
ILMkkIR	Sjc_011694	15788507	23.4	0.0237396	2	985.619	-3.41914	40.3781	2
LILkkNK	Sjc_020992	5.03471e+06	17.02	0.103151	2	940.616	-3.45629	40.2366	2
ILSkLEHcPNMTLQEVTTDcQR	Sjc_0218800	2.26659e+06	19.86	0.0960468	3	2715.29	-1.00494	36.3817	1
SSDkPFcSSPEVTK	Sjc_0030250	935137	27.96	0.00830757	2	1610.73	-4.31256	30.2788	1
AFNkVAGDDGEIDADELRDILNcAFTR	Sjc_0300430	5.86146e+07	49.06	0.000100574	3	3067.43	-4.19784	46.8967	2
AFNkVAGDDGEIDADELR	Sjc_0300430	1.88246e+07	87.22	1.11906e-08	2	1976.91	-4.12749	35.8089	1
YNLkQFQDIADSVK	Sjc_0076820	3.61451e+07	76.28	2.87316e-07	2	1710.86	-4.13113	40.6193	1
GVLkVFLENVIR	Sjc_0016100	3.31983e+07	67.52	9.19336e-07	2	1428.85	-2.93192	50.0106	1
NIDkFVSEAADLAGDFGNAAR	Sjc_0208800	2.37284e+07	62.07	6.73643e-06	2	2223.06	-3.99936	48.1107	1
EAMkYAENLTVTHPIR	Sjc_0204420	1.99424e+07	61.54	8.59283e-06	2	1914.97	-3.31243	34.0639	1
NTSkSSEVTENKT	Sjc_0066380	1.86495e+06	60.38	7.32976e-06	2	1466.69	-4.08452	21.84	2
VTEkYTEEEQLNK	Sjc_0044660	8.4425e+06	53.34	4.26371e-05	2	1652.8	-3.83275	29.0076	1
LSSkFDVR	Sjc_0035720	4.00065e+07	47.44	0.000204643	2	993.533	-3.37048	31.7852	1
NAGkSADEMR	Sjc_0070960	4.5211e+06	47.06	0.000102205	2	1120.5	-4.39497	22.17	1
FLVkEFQR	Sjc_0026230	2.09285e+07	46.57	0.000163017	2	1108.61	-3.49511	35.61	1
GSFkYAWVLDK	Sjc_0054280	12421645	45.79	0.000268906	2	1355.69	-3.65915	41.2045	1
ALLkELADFDSK	Sjc_0134610	8625119	40	0.001345	2	1391.74	-4.29746	41.2167	1
YAGkHFR	Sjc_0209670	73779309	39.82	0.00115176	2	920.47	-3.57508	22.9566	1
GEEkSFFPEEISSMVLVAMK	Sjc_0044680	1.05514e+07	33.39	0.00508537	2	2300.11	-3.85255	50.4758	1
FASkAIDWLDEQINANIR	Sjc_0211970	8.64693e+06	31.3	0.00856213	3	2146.08	-3.71527	47.1559	1
ALYkAMK	Sjc_0212110	7.18443e+06	30.7	0.00625586	2	866.477	-3.75757	28.4673	1
AILkFPSLEAR	Sjc_0214960	8.98075e+06	28.51	0.0107106	2	1286.74	-2.85738	40.0876	1
SYSkHSR	Sjc_0094770	140165	27.9	0.0137854	2	906.438	-4.93717	18.0265	1
HIAkAIR	Sjc_0014130	1.31256e+08	24	0.0206764	2	850.523	-3.20796	28.7082	1
VVGkYDNK	Sjc_0302840	2.32222e+06	24	0.0386164	2	964.506	-3.9681	22.5256	1
LGQkYIHEAK	Sjc_0061560	7.25225e+06	23.31	0.0480659	3	1228.66	-4.06946	26.0504	1
AVTkYSGSK	Sjc_0016080	2.82837e+06	23.04	0.0317819	2	982.517	-3.64781	21.875	1
FIVkVLR	Sjc_0089770	1.02292e+07	22.56	0.0288054	2	916.596	-2.14104	40.7121	1
FNHkFMIQSIIAPDDPRPTMEQLWK	Sjc_0215630	1.18787e+07	22.18	0.0611394	4	3084.53	-4.3359	42.026	2
ELSkNGSILR	Sjc_0000750	1.25478e+07	21.86	0.0752631	2	1158.65	3.04355	45.9621	1
HIPkLK	Sjc_0022470	9.26761e+07	21.81	0.0342353	2	777.495	-4.096	27.6189	1
TGSkFNK	Sjc_0202460	332158	21.76	0.0610128	2	823.427	-4.35085	22.0008	1
LVLkHIR	Sjc_0015290	2.91739e+07	21.59	0.0360142	2	920.601	-3.03325	32.766	1
IASkYQSSK	Sjc_0305980	1.96584e+06	19.77	0.0701167	2	1053.55	-3.22865	21.9641	1
VMSkVMPDEIYNLAAQSHVK	Sjc_0074530	4.29277e+07	19.51	0.142169	3	2302.15	-3.45906	39.4515	1
YTIkKSFSNINK	Sjc_0068950	1.04066e+07	19.4	0.110797	2	1484.82	9.40066	37.0313	2
MDKkGEK	Sjc_0024010	1.80241e+06	17.76	0.195131	2	877.438	-8.02856	23.8932	2
YDLkHK	Sjc_0055170	1.89322e+06	16.77	0.237727	2	845.449	-3.54999	24.9548	1
MSNkNRIQ	Sjc_0000440	6.99338e+06	16.3	0.284824	2	1032.52	-2.22304	40.9484	2
QKLkVTNR	Sjc_0203960	1.28994e+08	16.21	0.269248	2	1028.62	-3.20901	20.384	2
LMDkDLIIR	Sjc_0014090	1.25478e+07	16.13	0.281567	2	1158.65	-3.35181	45.9621	1
VLLkGQFKK	Sjc_0101420	3.3255e+07	15.74	0.138508	2	1102.69	-3.48301	39.0416	2
AMEkYK	Sjc_0051340	527942	14.25	0.246173	2	811.399	-3.21389	22.7278	1
LFLkTYLSR	Sjc_0013250	1.53536e+07	13.49	0.232811	2	1182.68	-6.91401	29.3903	1
ELkAMmER	Sjc_0212050	2.82011e+06	16.09	0.168535	2	1065.5	-3.47436	27.049	1
SGkFmNPTDQAR	Sjc_0216870	5.5605e+06	25.87	0.0160469	2	1409.64	-5.18627	27.7035	1
FTkYHDLSIEVNNmQFSTK	Sjc_0300270	7.51349e+06	18	0.137886	3	2360.11	-4.69165	35.7199	1
TGkVMDAkLVK	Sjc_0084270	9.14582e+06	20.07	0.0821649	3	1273.73	6.03632	36.2873	2
GGkGLGkGGAK	Sjc_0016100	3.44099e+07	33.84	0.00353156	2	1013.57	-4.68829	22.7023	2
LLkRYk	Sjc_0088320	3.48701e+07	15.02	0.163484	2	904.559	-2.61085	38.0398	2
ASkVkLPK	Sjc_0016080	1.73639e+07	32.79	0.00273196	2	954.594	-4.32382	27.9948	2
HGkYIAAIcAAPIALESHK	Sjc_0008070	22495754	30.38	0.0110863	3	2092.09	-3.27997	34.8183	1
SSkFPYcDGAHNK	Sjc_0074810	2.41878e+06	23.81	0.021601	2	1552.68	-3.83056	27.4894	1
INkYAYSGGGDTVAEHR	Sjc_0030360	1.6508e+07	104.85	3.1261e-10	2	1879.88	-5.00965	28.5313	1
FFkYNASVAR	Sjc_0300430	2.44015e+07	53.09	6.16089e-05	2	1244.64	-3.15195	33.8715	1
EAkYIAEDADR	Sjc_0304180	5.31543e+06	42.63	0.000354743	2	1322.62	-4.41823	28.379	1
FNkHVSSSR	Sjc_0032430	3.96197e+06	37.31	0.00184852	2	1103.56	-3.77416	21.8327	1
ELkAMMER	Sjc_0212050	6.8221e+06	35.45	0.00230932	2	1049.51	-4.88309	31.7563	1
LAkYNQLLR	Sjc_0209670	4.97329e+06	34.74	0.00271947	2	1160.67	-3.48776	34.6666	1
VNkTLDTK	Sjc_0054830	2.12736e+07	34.37	0.00403982	2	960.532	-4.27608	23.1412	1
FTkYHDLSIEVNNMQFSTK	Sjc_0300270	3.54685e+07	33.74	0.00382515	3	2344.12	-3.82048	38.1204	1
IFkQQGQALDK	Sjc_0207460	678764	33.73	0.00480835	2	1317.71	-2.65021	28.5241	1
VEkYLPK	Sjc_0100170	2.54232e+06	31.46	0.00582315	2	918.526	-3.58685	28.917	1
VAkDVFK	Sjc_0074580	2.03728e+06	28.34	0.0134098	2	848.485	-3.33118	29.4004	1
LTkSWSLR	Sjc_0043640	1.77339e+08	27.36	0.0154269	2	1032.58	-0.857103	31.564	1
FVkYLTK	Sjc_0025200	2.13738e+07	25.98	0.0131061	2	940.547	-3.73911	31.8241	1
FVkYDEK	Sjc_0042440	7.09638e+06	23.37	0.0239042	2	970.484	-3.68132	27.1538	1
FVkPVLK	Sjc_0026420	6.58107e+06	22.88	0.0267593	2	872.557	-3.95722	32.9173	1
KGkYDLDFK	Sjc_0209670	1.02893e+07	21.87	0.0474595	2	1155.6	-4.18772	31.7869	2
FFkGGQYAQAISLYDEGLKK	Sjc_0013160	1.32614e+07	20.56	0.109878	3	2305.18	-3.05436	39.384	2
QPkVLENSEGSR	Sjc_0026230	648446	19.95	0.116837	2	1385.7	-3.73195	26.3129	1
TSkYHVSR	Sjc_0090370	567294	19.6	0.12445	2	1019.52	-2.97687	21.5584	1
EAkYIAEDADRK	Sjc_0304180	0	18.82	0.135813	2	1450.71	-4.70079	25.9476	2
LVkQLR	Sjc_0082240	2.26898e+06	18.44	0.100253	2	798.516	-4.35235	30.9514	1
VNkITETK	Sjc_0017540	1.30972e+06	16.54	0.261747	2	974.548	-3.86446	26.0972	1
RIkTIK	Sjc_0306020	6.11723e+07	15.34	0.151871	2	800.532	-3.91516	28.9956	2
YIkWLVNQINGHIK	Sjc_0303010	3.58132e+06	15.13	0.174934	3	1767.99	-2.75819	40.108	1
VPkIPDGVEIIASTMPLPR	Sjc_0305830	7.35179e+06	13.57	0.270318	3	2075.15	-3.83794	46.2392	1
SEkLLGIIVSFGR	Sjc_0041650	8.11947e+06	13.49	0.232527	3	1460.86	7.4272	41.7893	1
LPkSVVELYR	Sjc_0302240	6.0749e+06	13.37	0.292263	2	1245.72	-3.86659	37.1775	1
VTLADVVLIASIDHITDLDKEFLTGkYPEIHK	Sjc_0063550	3.15324e+07	18.26	0.0775308	5	3635.95	-1.3665	50.2697	2
TFLGSVSDHVLHNVNVPVIIIPPPkHPK	Sjc_0210600	8.96522e+07	17.72	0.0877959	4	3096.73	-3.33634	40.5966	1
NADMSPEMQDDAVHVAASAMDkFDVEKDVAAFIK	Sjc_0025950	49395210	32.47	0.00294086	3	3737.7	-2.78788	47.588	2
NADMPEDMQQDAIEVATHAFEkYNIEK	Sjc_0080420	1.08891e+08	14.57	0.181332	3	3179.42	-3.7927	47.0179	1
YKDGVVLAADLLVSYGSLAkYMDFER	Sjc_0068310	2.18278e+07	51.52	8.0335e-05	3	2965.49	-3.17438	50.9817	2
VTLADVVLIASIDHITDLDkEFLTGK	Sjc_0063550	4.27225e+06	43.45	0.000234679	3	2868.54	-5.73243	53.0867	1
MQENAVHIAAAALDKYNVEkDIAAHVK	Sjc_0025920	1.62219e+07	31.21	0.00760617	4	2991.53	-3.434	40.4908	2
LkNHFLk	Sjc_0047510	2.70937e+06	19.1	0.0652042	2	983.566	-1.67849	31.0206	1
MkQQQkQQR	Sjc_0009730	686218	32.72	0.00585348	2	1286.66	-3.74176	19.7294	2
GkGGkGLGk	Sjc_0016100	1.37431e+08	15.75	0.178269	2	927.533	7.89555	22.6348	2
GkGGkSR	Sjc_0063110	428388	27.29	0.0329416	2	773.423	-5.01319	17.7509	2
FkkmcLTLSHPR	Sjc_0206320	3.12267e+07	20.17	0.115393	2	1617.83	4.96254	40.1335	2
GkYPAcGTK	Sjc_0089450	2.95619e+06	27.14	0.0134272	2	1023.49	-4.04034	22.2672	1
AkVIFVLGGPGSGK	Sjc_0212050	9.53209e+07	90.79	5.37724e-09	2	1371.79	-4.31523	38.4925	1
AkLESTLDEMEENLAR	Sjc_0054830	1.42428e+07	85.73	2.69974e-08	2	1890.91	-2.8467	42.8976	1
VkYYPEEVSEDLVEDITR	Sjc_0100170	20245153	59.39	1.29465e-05	3	2226.08	-2.73433	45.6898	1
VkVGTEFVTK	Sjc_0054830	5.47732e+07	56.02	1.91276e-05	2	1149.65	-3.9648	31.4874	1
LkAQLEEVHEQMEGLR	Sjc_0054830	1.33314e+07	49.96	0.000124643	2	1951.99	-1.64547	36.4493	1
SkFDGTTVYAQNKR	Sjc_0034190	2.95675e+06	47.5	0.000198278	2	1656.83	-3.92561	28.6391	2
SkYHLQDVIIGK	Sjc_0077550	2.29966e+07	44.22	0.000351952	3	1442.79	-3.76551	34.5117	1
SkSDSHSASWK	Sjc_0203850	219940	41.88	0.000336879	2	1261.58	-2.75702	21.7079	1
AkYDVDK	Sjc_0303190	2.61076e+06	41.03	0.000627144	2	880.438	-4.04197	23.6849	1
YkSNENPWFFHK	Sjc_0011460	3.27621e+07	39.47	0.000745665	2	1638.76	-4.79859	36.0627	1
YkSDETEIEK	Sjc_0044460	1.35146e+06	38.55	0.000788948	2	1283.59	-4.79479	26.0094	1
LkTLLENNLEAHIGR	Sjc_0066340	10939604	38.52	0.000913931	3	1762.98	-2.54663	36.9739	1
PkTLDVNK	Sjc_0025630	602519	37.55	0.00137997	2	956.538	-3.68103	25.9795	1
YkSLDR	Sjc_0120910	2.87222e+06	35.74	0.00170679	2	823.429	-2.70799	25.0358	1
LkEQLEESER	Sjc_0035730	654987	35.19	0.00319339	2	1302.65	-2.83757	27.8006	1
EkYDTVAK	Sjc_0102150	1.39047e+06	33.99	0.00331191	2	995.503	-1.83347	23.9323	1
GkYDLDFK	Sjc_0209670	3.11831e+07	33.98	0.00239967	2	1027.51	-4.23526	35.4475	1
GkYDLDFKNPQSAESHWLSPDEMANVYK	Sjc_0209670	1.17017e+07	32.26	0.00353604	3	3311.51	-5.50127	39.5628	2
SkWLPK	Sjc_0214350	5.02374e+06	31.15	0.00798056	2	800.464	-3.65624	31.6871	1
GkSLLEDPDDR	Sjc_0034190	3.36496e+06	30	0.00665	2	1286.62	-3.03159	31.9893	1
AkWTAWNGR	Sjc_0116460	3.25283e+07	26.09	0.0254648	2	1131.56	-4.48728	34.9146	1
GkFLNILGK	Sjc_0059840	4.18833e+07	25.15	0.0158662	2	1031.62	-3.35473	38.4245	1
DkFQNIGAK	Sjc_0215010	1.79418e+06	23.62	0.0606142	2	1062.55	-4.57406	30.8568	1
HkFDYVIHFAALK	Sjc_0303190	5.03923e+06	22.22	0.0863699	3	1630.87	-4.05337	38.4733	1
AkLLVLR	Sjc_0040560	1.94315e+07	19.36	0.060183	2	854.579	-3.48133	39.5895	1
VkLSLIK	Sjc_0209180	2.64854e+06	19.14	0.0633103	2	842.579	9.59177	29.4872	1
AkYYHDTNTAGPQSR	Sjc_0024050	434028	17.98	0.106678	3	1750.81	-5.23551	22.903	1
AkAVNQILR	Sjc_0212510	6.92653e+07	15.37	0.180049	2	1054.63	-3.85752	29.5555	1
RkLTIK	Sjc_0309160	6.11723e+07	15.34	0.151871	2	800.532	-3.91516	28.9956	2
QkLKNNILK	Sjc_0042850	1.24015e+08	13.68	0.222574	2	1140.71	0.144039	37.453	2
VSHVSTGGGASLELLEGkQLPGVVALTDAH	Sjc_0031010	1.21825e+07	37.68	0.00121985	3	2984.56	-2.8032	41.8271	1
GGKEEEILTANLDFSELkHVR	Sjc_0205020	5.18027e+06	25.89	0.0311735	3	2427.24	-3.76623	39.0899	2
VGINYQPPTVVPGGDLAkVQR	Sjc_0004280;Sjc_0049920	1.55051e+07	24.98	0.0230323	2	2250.22	-3.26716	37.9405	1
RGLYGNIVLSGGSSMFkHLDR	Sjc_0202840	1.77786e+07	50.74	9.23452e-05	3	2349.2	-3.67412	38.7745	2
GLYGNIVLSGGSSMFkHLDR	Sjc_0202840	3.45462e+07	33.79	0.0051811	3	2193.11	-2.5789	41.0707	1
SGLIVSYHPPIFSSLkK	Sjc_0210250	1.93307e+07	30.95	0.00490151	2	1915.06	-2.70491	39.1931	1
ALADHHVYLEGTLLkPNmVTAGQAcK	Sjc_0031630	8.59205e+07	28.67	0.0158923	4	2895.43	-5.20146	34.9181	1
ALADHHVYLEGTLLkPNMVTAGQAcK	Sjc_0031630	155620022	52.4	6.61756e-05	3	2879.44	-4.08768	36.9984	1
VIDLLSTDEATLQLkHIYLEPGVNcDVK	Sjc_0066500	1.12183e+07	39.25	0.000956744	3	3225.66	-3.64926	45.4361	1
MQENAVHIAAAALDkYNVEK	Sjc_0025920	5.18978e+07	47.68	0.000214113	3	2257.12	-3.23487	39.1131	1
SYVAANNLDEMMVTkWQTLFDPNR	Sjc_0047060	1.4228e+06	25.86	0.021402	3	2885.36	-1.25877	51.7127	1
MIGQVEDVESEYHkTLmKPPEEK	Sjc_0063550	1.51068e+07	23.09	0.0382908	3	2775.31	-3.43145	34.0174	2
MIGQVEDVESEYHkTLMKPPEEK	Sjc_0063550	4.63207e+07	45.5	0.00026211	3	2759.32	-3.9449	35.0516	2
SVSSLTGGIAYLFkQNK	Sjc_0205700	1.09566e+07	40.56	0.000927369	2	1854.99	-2.5206	43.9026	1
LINQTVFPVTYTEkFYSDVLK	Sjc_0120450	5.07511e+08	35.91	0.0024619	3	2547.33	-3.6767	47.2542	1
RDNSGNNQDGPPTkFQR	Sjc_0111740	3.5356e+06	33.33	0.00274064	3	1972.91	-4.19928	26.2192	2
RPVNPNTGNAPFkQmENIQR	Sjc_0304870	962247	21.4	0.101059	3	2369.17	-1.30907	28.4555	2
VPHNAAVQIYDYkNK	Sjc_0044460	9.22518e+07	86.79	2.81658e-08	2	1801.92	-4.16739	31.7135	1
VPHNAAVQIYDYkNKR	Sjc_0044460	5.47205e+07	68.08	2.06165e-06	2	1958.02	-3.98322	30.5538	2
DNSGNNQDGPPTkFQR	Sjc_0111740	3.66033e+07	57.27	9.7381e-06	2	1816.81	-4.4267	29.311	1
MSENPISNNVPVkFR	Sjc_0004470	7.65641e+07	42.51	0.000743389	2	1773.89	-3.0307	36.8591	1
YEEHLYERDEGDkWR	Sjc_0038300	9.94124e+07	35.66	0.00141083	2	2066.91	-5.13362	30.6021	2
SAATIHGVINGIkW	Sjc_0054460	6.78466e+06	30.79	0.00741976	2	1508.82	-3.63224	40.61	1
TLHFVVSDVEPkYYADGEDAYAmR	Sjc_0031810	3.87468e+07	56.74	1.23924e-05	3	2834.29	-4.5027	38.7034	1
INVYYNEASGGkYVPR	Sjc_0060500;Sjc_0090690	1.68761e+07	91.71	7.9257e-09	2	1871.92	-3.28718	34.7745	1
TLHFVVSDVEPkYYADGEDAYAMR	Sjc_0031810	261736366	64.52	2.43696e-06	3	2818.29	-3.97195	39.6074	1
GFNQYILAPIYkVFETVTK	Sjc_0012720	2.70794e+06	47.01	0.000163235	3	2273.21	-4.31949	52.9508	1
RFDDASVQSDMkHWPFK	Sjc_0044680	1.54021e+08	44.96	0.000240961	2	2135.99	-2.61132	37.7211	2
TVTAMDVVYALkR	Sjc_0016100	5.90126e+06	38.33	0.00157175	2	1508.81	-2.71082	44.1103	1
VLYPNDNFFVGkELR	Sjc_0083460	9.74278e+06	23.58	0.0552549	2	1852.95	-4.61702	41.3619	1
YSYSGIAYTAAkFHPLSDADWK	Sjc_0056420	1.10222e+07	18.78	0.0966769	3	2533.19	-4.24925	41.2184	1
EAAESSLLAYkEAmK	Sjc_0204420	3.88358e+06	58.08	1.22921e-05	2	1698.82	-3.06165	35.5386	1
EAAESSLLAYkEAMK	Sjc_0204420	2.37059e+07	93.96	3.59603e-09	2	1682.82	-4.15391	39.0771	1
TQEALQAEEDkVNHLNK	Sjc_0054830	3.52308e+06	78.25	1.74311e-07	2	2008.98	-4.64306	33.2275	1
FDDASVQSDMkHWPFK	Sjc_0044680	89864892	70.08	5.09887e-07	2	1979.89	-3.96554	39.4584	1
IVFELFDNVPkTAENFR	Sjc_0001030	1.37518e+07	59.19	1.40387e-05	2	2081.06	-5.25815	44.8024	1
LGLIPLAVDPkYFLFPTR	Sjc_0014050	9.68241e+06	40.27	0.000488061	2	2102.2	-2.00985	51.3685	1
DSIPPLIVFAkDGHYALSDLSK	Sjc_0084260	5.62482e+07	40.22	0.00103141	2	2428.27	-3.83283	47.0103	1
AGQAVDDFISkLVPLLEK	Sjc_0030250	0	32	0.0052054	2	1985.09	-2.38299	51.1172	1
ANLEATEFKLkASDSALNVER	Sjc_0076030	1.18398e+07	17.1	0.212533	2	2348.21	-1.17355	50.3369	2
IEEELGSTAkYAGK	Sjc_0209670	4.84332e+07	76	2.68772e-07	2	1537.77	-4.78542	30.7803	1
MYGALQGLNkSETAAK	Sjc_0304750	9.63321e+06	66.66	2.76191e-06	2	1723.86	-4.44405	34.5258	1
WMDNNQLAEkEEFEEK	Sjc_0044680	8.15425e+06	66.02	1.2986e-06	2	2081.9	-4.22613	37.6035	1
DGFIDIEDLkDMYASLGR	Sjc_0211400	2.48466e+06	56.77	1.96703e-05	2	2099.99	-0.860173	51.5634	1
MMMTSGQAVkYK	Sjc_0062310	3.43068e+06	56.35	1.52948e-05	2	1416.66	-5.66001	30.7335	1
RIEAIPQIDkYLK	Sjc_0038300	4.47637e+07	52.6	3.07743e-05	2	1628.93	-3.61363	37.6866	2
FWGDNFYNLkEK	Sjc_0012720	4686482	49	7.93123e-05	2	1602.75	-4.68444	41.4005	1
FDEFEISGSkYAPEGIVYHHGR	Sjc_0047360	6.66139e+07	48.46	0.000102644	3	2580.21	-2.83011	36.9946	1
FHDKPFNQGkIFK	Sjc_0042030	1.74842e+07	40.03	0.00128112	2	1647.86	-3.52595	30.9768	2
kHNmmGDTDDEYYIIEK	Sjc_0063550	6.37898e+09	58.19	7.87906e-06	3	2175.91	-4.12464	32.7272	1
kHNmmGDTDDEYYIIEKMIGQVEDVESEYHK	Sjc_0063550	4.35909e+07	15.37	0.150825	5	3820.64	-6.01899	45.6013	2
kHNmMGDTDDEYYIIEK	Sjc_0063550	14565715776	70.4	4.73668e-07	2	2159.92	-5.09031	36.0667	1
kHNMMGDTDDEYYIIEKmIGQVEDVESEYHK	Sjc_0063550	147774672	67.16	9.9879e-07	4	3804.66	-2.94961	41.1953	2
kGNTSTASkR	Sjc_0112250	421385	69.09	1.94214e-06	2	1133.59	-2.89101	19.6145	2
kKIVQEGGk	Sjc_0100090	1.37332e+09	20	0.106	2	1070.63	7.3342	24.4361	2
kSTGGkAPR	Sjc_0063120	9.51829e+07	59.83	9.56727e-06	2	985.539	-3.63585	19.8749	2
kQLATkAAR	Sjc_0063120	1.37332e+09	54.17	4.05794e-05	2	1070.63	-3.15497	24.4361	2
kILVkGLk	Sjc_0043570	1.64659e+07	13.01	0.259701	2	1024.68	7.28152	43.4394	2
kLNLkIR	Sjc_0300050	4.20738e+07	28.21	0.00784285	2	968.623	-2.71121	39.6589	2
kSIQFVDWcPTGFK	Sjc_0301890	1.12998e+07	28.02	0.0155395	3	1754.86	2.7246	38.7139	1
kWHPEcFVcTIcK	Sjc_0057770	1.68387e+06	13.36	0.239593	2	1806.81	-2.33736	36.1573	1
kWSccNK	Sjc_0303290	1.11732e+06	17.96	0.0830757	2	1024.43	-4.45654	22.8605	1
kHVcNDDGSVLVVSK	Sjc_0310070	734807	46.02	0.000237533	2	1698.84	-4.1383	27.8752	1
kHNMMGDTDDEYYIIEK	Sjc_0063550	39086413745	112.61	2.84757e-11	2	2143.92	-3.17282	35.1447	1
kYADSQAELENAQR	Sjc_0054830	6.36742e+06	81.43	5.18003e-08	2	1664.78	-3.8821	28.228	1
kHNMMGDTDDEYYIIEKMIGQVEDVESEYHK	Sjc_0063550	5.26107e+08	52.72	2.77635e-05	3	3788.66	-4.15569	46.9382	2
kYQSVTGGIQR	Sjc_0035730	3.30505e+06	43.83	0.00049059	2	1278.67	-4.40317	27.1778	1
kHLLATSPK	Sjc_0063550	2.58859e+08	40.93	0.000419251	2	1036.61	-3.4927	23.7955	1
kFQQQVR	Sjc_0054830	2.00751e+06	35.41	0.0038701	2	975.532	-4.79745	22.981	1
kYLVLR	Sjc_0054830	8.61231e+06	30.77	0.00434985	2	833.521	-3.6321	33.6851	1
kYDVSAMPTFIVIK	Sjc_0039090	8.36507e+06	27.08	0.0153769	2	1653.9	2.74367	39.633	1
kHLEDEHER	Sjc_0050230	561201	25.93	0.0154438	3	1234.58	-3.00473	20.1858	1
kHSQFINYPIK	Sjc_0044660	1.38329e+07	22.28	0.071579	2	1416.76	-3.08133	31.8398	1
kFHLLHDIVPEK	Sjc_0056120	6.85593e+06	16.64	0.212435	3	1517.84	-3.49743	34.8127	1
kRITLK	Sjc_0007470	6.11723e+07	15.34	0.151871	2	800.532	-3.91516	28.9956	2
kPVPESSLLDKISK	Sjc_0214210	2.70296e+06	13.24	0.246306	2	1582.91	2.89926	26.7145	2
LWNTLGHckYVFTK	Sjc_0015980	5.01939e+06	34.29	0.00482247	2	1808.91	-4.7689	36.9133	1
RLSDLckVLK	Sjc_0082570	9.14582e+06	24.64	0.0286871	3	1273.73	-2.77169	36.2873	2
AFSEVcSNPAAMDkYK	Sjc_0200640	2154760	43.92	0.000210608	2	1859.82	-4.44194	34.2185	1
TSGTcAHkLFER	Sjc_0204960	5.31145e+06	40.15	0.000854955	2	1448.69	-4.81287	28.3948	1
DLLTcFLkPK	Sjc_0054830	5.64448e+06	25.69	0.0312938	2	1276.69	-4.55912	44.7752	1
IDQNcVVGLAYkLK	Sjc_0200380	1.90655e+07	49.75	0.000154651	2	1662.88	-3.19689	39.3821	1
YSYVcPDLPkEFAK	Sjc_0202840	1.07883e+07	14.43	0.290266	2	1758.83	-3.7731	38.4645	1
MVLcQHQSLQQVIkRTK	Sjc_0017410	6.45539e+06	16.67	0.19375	2	2139.15	-2.49908	51.7299	2
VNcGLIkmYK	Sjc_0303020	1.70133e+06	17.02	0.159881	2	1283.64	-3.87253	31.7756	1
ALcTGEkGYGYK	Sjc_0001030	5.21134e+06	48.94	7.08424e-05	2	1388.65	-4.29547	28.9643	1
VNcGLIkMYK	Sjc_0303020	7.55816e+06	22.2	0.0608585	2	1267.65	-3.40681	34.9507	1
IDcHFkSVINR	Sjc_0083470	1.74469e+07	43.41	0.000440076	2	1430.72	-2.69913	31.7472	1
HIcNLSNDIkR	Sjc_0044280	1.12426e+06	29.47	0.0131621	2	1411.71	-3.46102	28.0557	1
IcLDkYYLNSAR	Sjc_0104550	1.35448e+07	67.41	2.01522e-06	2	1557.77	-2.9209	37.7439	1
LcLTkQELYK	Sjc_0207310	2.1818e+07	57.98	1.60017e-05	2	1337.71	-3.44056	34.9728	1
FcTSkYDVTVIDAPGHR	Sjc_0054280	3.0411e+06	53.28	3.97061e-05	2	2007.96	-2.04811	34.7857	1
HcFQkQLSTK	Sjc_0303480	1.51769e+07	34.42	0.00346953	2	1318.65	-3.14452	25.6886	1
NckFNPK	Sjc_0043930	1.668e+06	18.76	0.0864795	2	949.452	-4.3166	25.0521	1
AcNcLLLkVNQIGSITESIEAcK	Sjc_0209670	1.45907e+07	52.22	6.77764e-05	3	2663.31	-3.55729	46.7984	1
EYYYQPPTLTcLTPkFcTIYR	Sjc_0009730	3.55623e+07	24.14	0.0331511	3	2756.3	-3.94693	44.0022	1
QATVGDNNTcSPGILDLkGK	Sjc_0116460	4.1232e+06	47.97	0.000169163	2	2130.04	-4.15073	36.407	1
cGLcNkMLDSTTVAEHEGEVYcK	Sjc_0202230	3.78684e+06	19.23	0.0620118	3	2743.17	-4.85363	36.7986	1
qQGQALDkYAK	Sjc_0207460	7.17075e+06	54.39	4.56713e-05	2	1274.64	4.91049	30.6751	1
qLVGTFkAFDR	Sjc_0305030	1.39892e+06	45.89	0.000319464	2	1306.69	5.73491	43.604	1
qLATkAARk	Sjc_0079610	2.18753e+06	20.28	0.0501596	2	1053.61	4.96091	32.5154	2
qLATkAAR	Sjc_0079610	3.41441e+08	39.06	0.000701534	2	883.503	3.29681	27.1575	1
qLQkLQGELQQLR	Sjc_0054830	1.96706e+06	50.16	6.40946e-05	2	1606.9	4.45935	44.4903	1
qkQLQQR	Sjc_0112250	2.14011e+07	33.59	0.00306265	2	953.521	4.42372	24.071	1
qkYTQSNGR	Sjc_0064130	2.37306e+06	45.23	0.000290919	2	1106.53	4.71769	22.7603	1
qLEGDKYDWEEkLR	Sjc_0026420	8.9165e+06	21.66	0.0985979	2	1833.87	4.96872	38.3148	2
qLVEDHFLFkNDDPVLR	Sjc_0200590	26136016	47.68	0.000249088	2	2110.07	3.41091	41.8727	1
mESVAAHkDEVAPVESK	Sjc_0211620	1.51575e+06	51.47	0.000102651	2	1926.92	5.12525	27.67	1
mDPSDPDFkYLGVDR	Sjc_0134610	1.2747e+07	34.73	0.00237241	2	1838.84	5.35234	43.704	1
sVPLAVPVkK	Sjc_0078660	2.16202e+06	28.43	0.00316778	2	1121.7	3.90651	35.7122	1
mESVAAHkDEVAPVESK	Sjc_0211620	3.0559e+06	83.78	6.34472e-08	2	1910.92	4.04026	31.6539	1
sSFLGkWK	Sjc_0200770	1.17051e+07	32.34	0.00481342	2	1036.55	6.8892	42.173	1
sSLSkAEIEDIR	Sjc_0305580	0	49.98	0.000160739	2	1431.74	4.40576	37.5745	1
akSSAKPR	Sjc_0055670	191438	28.5	0.0144079	2	928.525	3.7505	17.1797	2
DLTDYLmkILTER	Sjc_0002370;Sjc_0042620	1.48912e+06	44.71	0.000485123	2	1668.86	5.11701	49.3344	1
DLTDYLmkILTER	Sjc_0002370;Sjc_0042620	1.48912e+06	44.71	0.000485123	2	1668.86	5.11701	49.3344	1
DELNDmkTK	Sjc_0092100	581975	36.22	0.00181474	2	1151.53	4.03578	21.2776	1
SLVTDmkK	Sjc_0064950	889087	25.83	0.0304317	2	979.518	5.12456	21.7148	1
HQGVmVGMGQkDSYVGDEAQSK	Sjc_0002370;Sjc_0042620	811023	48	0.000163244	3	2409.1	5.79203	27.1279	1
HQGVmVGMGQkDSYVGDEAQSK	Sjc_0002370;Sjc_0042620	811023	48	0.000163244	3	2409.1	5.79203	27.1279	1
DILmHYDEkNPLPK	Sjc_0076300	1.30041e+07	35.96	0.00367594	2	1770.88	4.78185	31.7366	1
YNDmAcAmkkVVEmPSk	Sjc_0053680	3637084453	16.71	0.0778561	3	2175.93	-5.74935	28.9997	2
NADMSPEMQDDAVHVAASAmDkFDVEK	Sjc_0025950	6.25859e+06	45.29	0.000140506	3	3009.3	3.42489	37.2182	1
FmDSTNTkFNR	Sjc_0304610	1.05602e+06	27.48	0.0122374	2	1418.64	3.48361	25.9298	1
AmGkLEQR	Sjc_0054830	1.17219e+06	43.84	0.000518375	2	990.508	4.02493	19.3536	1
VmSkVMPDEIYNLAAQSHVK	Sjc_0074530	3.53342e+06	24.58	0.0548631	3	2318.16	4.73509	35.2736	1
FDDASVQSDmkHWPFK	Sjc_0044680	1.57803e+06	21.08	0.0635562	2	1995.9	4.73005	33.1922	1
mNPAkYDK	Sjc_0035730	915493	29.5	0.00723702	2	1024.48	3.93493	19.0891	1
mkQQQkQQR	Sjc_0009730	99576.2	41.9	0.00103305	2	1302.66	4.33092	16.6305	2
mQENAVHIAAAALDkYNVEK	Sjc_0025920	4.58782e+06	56.44	3.99496e-05	3	2273.13	4.4756	35.627	1
mSENPISNNVPVkFR	Sjc_0004470	3.30902e+07	41.44	0.00119513	2	1789.9	5.29331	32.5554	1
mMMTSGQAVkYK	Sjc_0062310	361437	42.47	0.000571902	2	1432.67	5.19496	25.3154	1
mYGALQGLNkSETAAK	Sjc_0304750	3.79898e+06	64.8	4.48683e-06	2	1739.87	4.27264	29.746	1
KAEPISWSkLEYcK	Sjc_0303290	2.82159e+06	40.66	0.00142596	2	1780.9	4.97347	31.914	2
ADIGDLASkHK	Sjc_0067360	2.39272e+06	38.54	0.00141358	2	1196.63	4.05073	24.813	1
ANGAAAVGkFEGDMGTALGDK	Sjc_0031630	4.23877e+06	53.53	6.65413e-05	2	2021.97	5.34743	36.9226	1
DILMHYDEkNPLPK	Sjc_0076300	7.06325e+07	33.8	0.00587786	2	1754.89	4.43198	32.6748	1
EAESLLLAkNLNK	Sjc_0079220	1.70459e+06	47.61	0.000172513	2	1484.84	5.17962	33.8176	1
FEDESFDNkHDK	Sjc_0001030	936760	53.45	1.71705e-05	2	1552.66	4.54102	24.2006	1
IEAIPQIDkYLK	Sjc_0038300	7.66624e+07	30.92	0.00655368	2	1472.84	5.23425	37.5037	1
LLLEYLEEkYEEHLYER	Sjc_0038300	6.89477e+07	48.43	0.000240444	2	2311.16	5.55594	43.5534	1
LLLPGELAkHAVSEGTK	Sjc_0016080	7.49058e+06	82.79	2.86679e-08	2	1805.03	5.11476	34.0299	1
NQDGNTYSkTASPINYK	Sjc_0302990	1.88316e+06	87.35	2.44823e-08	2	1942.92	4.12288	28.2351	1
PIGIALDTkGPEIR	Sjc_0201440	1.68799e+06	66.9	8.37113e-07	2	1521.87	5.67307	34.4528	1
RVELAEAVkHK	Sjc_0012620	2.43558e+06	39.71	0.000545218	3	1321.76	3.92911	21.3266	2
TVNVAHDAkEK	Sjc_0209910	262621	23.36	0.0498223	2	1253.65	3.9833	18.476	1
TVQNLLLEkIR	Sjc_0011870	5.34748e+06	41.81	0.000227415	2	1368.83	5.07161	37.8551	1
FNDPEVQkDmK	Sjc_0026230	0	26.41	0.0182848	2	1408.65	5.8229	24.5952	1
ITAAEALkHPWIcQR	Sjc_0121020	2.0083e+06	29.27	0.0144331	3	1835.97	3.89555	33.7695	1
AEPISWSkLEYcK	Sjc_0303290	1.00314e+07	57.48	2.50108e-05	2	1652.81	4.25065	35.6233	1
AEVAINTkTGGSYAVVQK	Sjc_0210420	550519	39.21	0.0011875	2	1878.01	4.78625	29.6282	1
ALNTQSFkLSAVTEK	Sjc_0133200	920565	56.03	2.68169e-05	2	1678.91	6.15176	33.6271	1
DAVYYVYkSDGQTPGLLEQK	Sjc_0009730	1.0794e+06	35.44	0.00475789	2	2316.15	6.62583	37.3088	1
DGDEVVDkK	Sjc_0305830	1.20585e+06	52.18	4.93353e-05	2	1046.5	4.2598	22.3232	1
DLTDYLMkILTER	Sjc_0002370;Sjc_0042620	2.95603e+06	57.53	2.26936e-05	2	1652.87	6.15201	52.5031	1
DLTDYLMkILTER	Sjc_0002370;Sjc_0042620	2.95603e+06	57.53	2.26936e-05	2	1652.87	6.15201	52.5031	1
DNIQGITkPAIR	Sjc_0016100	1.32749e+06	19.44	0.0745146	2	1367.77	4.19571	31.3428	1
DSAGYTFkK	Sjc_0300180	323957	24.13	0.0245343	2	1058.52	3.08543	26.9871	1
EDLDGNIkYEELIK	Sjc_0305580	7.44881e+06	68.18	2.61534e-06	2	1720.87	5.54164	36.9529	1
ELADFDSkNVIWVEDEK	Sjc_0134610	1.44221e+07	28.12	0.0251297	2	2079	3.73402	39.6895	1
ELADFDSkNVIWVEDEKDGYVLANIK	Sjc_0134610	2.05815e+07	33.59	0.00680347	3	3052.53	5.53648	41.1125	2
ELFLPVYkQMLDAMYK	Sjc_0027600	3.62513e+06	34.01	0.00621605	2	2031.04	5.44483	47.7242	1
EVLTLLSkYLTPK	Sjc_0030210	1.04564e+07	54.01	9.73119e-06	2	1546.92	4.72109	43.8569	1
FGEEFDEkTSDGR	Sjc_0200770	7.47266e+07	67.98	6.44845e-07	2	1558.67	4.70588	30.7996	1
FMDSTNTkFNR	Sjc_0304610	2.69292e+06	50.33	6.53415e-05	2	1402.65	3.72731	29.1356	1
GIVHGVEkGILVR	Sjc_0078660	667234	15.34	0.064529	3	1418.85	3.23879	29.7321	1
HAVSEGTkAVTK	Sjc_0016080	218398	46.35	0.000209724	2	1269.68	3.70135	17.5295	1
IEFQDWPkIKPTIPGGR	Sjc_0063550	6.07234e+06	23.96	0.0319424	3	2024.1	3.91678	36.3458	2
INAHQDSkELGR	Sjc_0012720	167393	24.13	0.057955	3	1409.72	6.10731	20.3929	1
IPLQDVYkIGGIGTVPVGR	Sjc_0054280	1.25135e+07	37.68	0.000477703	3	2024.17	5.98988	39.4203	1
IVEVNDQkVK	Sjc_0005410	1.69026e+06	20.3	0.0905257	2	1213.68	4.84608	24.2031	1
LRDQFDFkTR	Sjc_0055610	8.92757e+06	33.22	0.00543131	3	1367.71	5.11907	28.564	2
LVSTSFDkK	Sjc_0075160	2.29072e+06	45.57	0.000207999	2	1066.58	4.21792	25.9854	1
NEEEYFYkLQQQQIR	Sjc_0050230	1.4171e+06	62.06	9.64565e-06	2	2058	4.25954	35.8373	1
NLFSVAYkNVVGAR	Sjc_0030210	4.2336e+06	46.29	0.000239663	2	1579.87	4.87547	40.2179	1
NVQEILGkSVEK	Sjc_0044660	1.03454e+07	61.54	8.06674e-06	2	1385.77	4.62469	31.7879	1
QQGQALDkYAK	Sjc_0207460	1.56103e+06	32.18	0.00886824	2	1291.67	4.13797	24.6115	1
RLEEEAIkYK	Sjc_0001510	947156	33.96	0.004038	2	1320.72	5.09984	24.4928	2
SHDSILSkLDTFK	Sjc_0066160	797883	51.95	9.7016e-05	2	1532.8	5.43077	36.6984	1
SPILGYWkIK	Sjc_0038300	902023	19.28	0.0637373	2	1246.73	4.5551	37.6435	1
TPSAIKPkSSPK	Sjc_0078660	3.98991e+06	34.9	0.00176359	2	1282.74	4.30853	18.7736	2
TVDGPSSkLWR	Sjc_0025800	9.43261e+07	37.73	0.00233588	2	1287.68	4.64573	31.2441	1
VELAEAVkHK	Sjc_0012620	884545	31.03	0.00453595	2	1165.66	3.79922	23.9648	1
DVSHVAkHFVALSTNATEVcK	Sjc_0301250	1.96202e+06	45.66	0.000395242	3	2355.19	4.29868	33.6936	1
LLQETPkEVPWLcK	Sjc_0076480	4.04062e+06	24.29	0.0431974	2	1782.95	4.87233	37.2139	1
AAEELAkLK	Sjc_0054830	1.52577e+06	42.27	0.000809343	2	1014.59	3.43797	27.4	1
AAEELAkLKEEFEK	Sjc_0054830	4.01386e+06	54.32	6.37954e-05	2	1676.88	3.61405	33.9787	2
AAGLSPkFAR	Sjc_0093550	434774	22.91	0.0662628	2	1059.6	2.33787	28.0047	1
AASDESkVFLHK	Sjc_0204420	2.34185e+06	47.39	0.000261729	2	1373.71	3.61706	26.233	1
ASPSVSkSGATVVVGGK	Sjc_0047310	1.11197e+06	35.1	0.00378561	2	1572.87	3.68216	26.6988	1
ATADQIkAFSESLTK	Sjc_0031010	1.46054e+06	66.11	3.57563e-06	2	1651.86	5.16749	37.8341	1
AVTYDLkEANVK	Sjc_0203140	880004	76.85	2.69532e-07	2	1392.74	3.68821	29.4739	1
DELNDMkTK	Sjc_0092100	1.42935e+06	32.35	0.00547177	2	1135.53	1.97957	26.6701	1
DLKDDLkSDTSGDFR	Sjc_0101450	3.56038e+07	61.39	9.87504e-06	2	1753.83	4.89262	33.6792	2
EIAQDFkTDLR	Sjc_0079610	6.84303e+06	53.68	6.83535e-05	2	1377.71	4.99015	33.2456	1
FMQSELkHVSHEINTK	Sjc_0003450	2.02186e+06	23.22	0.0855194	3	1969.99	4.17216	28.2378	1
FYEQFSkNIK	Sjc_0044660	1.34012e+06	41.59	0.00106094	2	1345.68	3.7506	31.4838	1
GGGSANkTFLYQQTK	Sjc_0217510	2.08777e+06	57.03	2.92275e-05	2	1641.83	4.46187	29.0971	1
HATDPAkYWTYGVNGVSGR	Sjc_0000730	5.03284e+06	52.49	0.0001054	2	2121.03	6.23635	32.9435	1
HGEAQVkIWR	Sjc_0304750	3.65106e+06	46.15	0.000276634	2	1265.68	3.1733	26.1893	1
HIIPGIkVDK	Sjc_0031630	3.8223e+06	15.73	0.0748442	2	1161.7	2.26517	26.4988	1
IMSYIEkGK	Sjc_0208240	5.5483e+06	38.67	0.00135831	2	1110.59	4.23716	28.1445	1
INFHFEkNEWFK	Sjc_0002330	3.40849e+06	28.75	0.0188027	3	1680.83	5.46082	37.2101	1
IQDSNLkYQSR	Sjc_0209790	468939	51.24	0.000104851	2	1393.71	3.7824	24.6949	1
LEEEAIkYK	Sjc_0001510	1.20184e+06	35.41	0.00395642	2	1164.62	3.09752	26.6654	1
LKEEFEkLEK	Sjc_0054830	1315082	28.63	0.0152168	2	1334.73	3.55645	27.3167	2
LTHELQkFGIK	Sjc_0212050	5.46835e+06	47.35	0.000159227	3	1355.78	5.56447	30.3823	1
MIYSEFkQR	Sjc_0054830	4.2694e+06	22.02	0.0568393	2	1243.62	4.15877	31.0121	1
NSTFSIkLK	Sjc_0211850	909970	20.63	0.054493	2	1079.61	4.15424	31.4982	1
SVHEIDkNR	Sjc_0054830	520914	21.41	0.0726384	2	1139.59	4.46699	18.1981	1
SVSTSSkYVNGK	Sjc_0201910	1.00585e+06	61.33	7.54612e-06	2	1298.66	3.69106	21.8461	1
TNPYNGkSFSTK	Sjc_0013210	601739	22.98	0.0533711	2	1385.67	3.43349	25.7376	1
TPYEQDkHYGEESYNVQNNEK	Sjc_0089450	978264	29.59	0.00593463	3	2614.14	3.97735	26.5165	1
TQEEYAkLLAQR	Sjc_0074090	3.97933e+06	63.22	6.00303e-06	2	1491.79	4.06639	32.4662	1
VIDYFAkQILTK	Sjc_0201800	1.44928e+06	22.8	0.0288644	2	1480.85	4.99036	38.4072	1
YDSTHGkFQGDVSVENGK	Sjc_0025800	1.82573e+07	66.5	2.1044e-06	2	2009.93	3.50921	26.2588	1
LPEMLkmFEDR	Sjc_0038300	2.6655e+06	52.79	6.207e-05	2	1466.71	5.86722	37.8572	1
AIIAQkYK	Sjc_0211260	3.70649e+06	32.38	0.00280377	2	976.585	2.37686	24.8559	1
AIYDHkFVDR	Sjc_0012060	2.02038e+06	30.97	0.0113576	2	1305.66	3.61608	27.984	1
AVSLEkLK	Sjc_0027340	5.81183e+06	49.12	0.000116339	2	929.571	4.37838	28.4587	1
DFETLkVDFLSK	Sjc_0038300	2.29739e+06	73.52	4.91318e-07	2	1483.78	4.87795	45.0601	1
DQFDFkTR	Sjc_0055610	1.82681e+07	41.65	0.000488997	2	1098.53	4.14398	31.6386	1
EFLTGkYPEIHK	Sjc_0063550	1.35208e+06	32.11	0.00864324	2	1503.79	4.68886	30.9175	1
EHTDFkHR	Sjc_0211970	3.1643e+07	33.4	0.00299393	2	1111.53	3.3265	17.1869	1
FSITSkELEEER	Sjc_0207460	575737	33.96	0.00490185	2	1509.75	1.78898	32.124	1
HGETQkNFR	Sjc_0054830	444952	32.14	0.00455152	2	1158.57	4.55199	17.9871	1
IVVEYkGEEK	Sjc_0044680	2.50828e+06	30.07	0.0114145	2	1235.66	2.91085	26.5472	1
KQLATkAAR	Sjc_0079610	6.68153e+07	48.62	0.000111984	2	1028.63	4.02036	16.8721	2
LIVVPkSVTFK	Sjc_0217190	681554	30.46	0.00198498	2	1272.8	4.12702	34.7502	1
LPEMLkMFEDR	Sjc_0038300	10001206	63.91	5.30409e-06	2	1450.71	4.78281	41.7882	1
NPSDAkLYSNR	Sjc_0217290	246741	35.61	0.00347609	2	1306.64	4.1666	24.7123	1
NYIEHkLK	Sjc_0043930	617196	24.68	0.0423808	2	1086.6	4.64243	23.2765	1
PFNQGkIFK	Sjc_0042030	2.08642e+06	38.16	0.00168032	2	1120.62	5.25683	30.4734	1
RAEAIkHSK	Sjc_0053680	309500	38.29	0.000867273	3	1081.62	6.3344	15.2907	2
SETAAkHGEAQVK	Sjc_0304750	4.09451e+06	68.52	1.71538e-06	2	1397.71	3.72368	17.053	1
SIYGNkFEDESFDNK	Sjc_0001030	4.16058e+07	73.39	3.5506e-07	2	1834.82	4.8401	33.5249	1
STGHSkYALEEK	Sjc_0026420	436370	26.61	0.0339415	2	1391.69	4.85809	21.3124	1
TQGAIkYTR	Sjc_0303480	1.36845e+06	35.51	0.00279784	2	1079.59	6.20212	22.2794	1
VDFLSkLPEMLK	Sjc_0038300	1.17164e+07	49.06	0.000126649	2	1461.81	4.62527	44.7174	1
YAEAEkLYK	Sjc_0303610	247732	22.77	0.043861	2	1156.59	1.83943	27.1305	1
YIHEAkSYK	Sjc_0211220	1.33859e+07	29.43	0.0156214	2	1180.6	3.46523	19.8425	1
YPEIHkHR	Sjc_0063550	1.93726e+07	38.89	0.00163339	2	1121.59	4.07538	19.6533	1
GLGLkANEmR	Sjc_0305830	277018	37.1	0.00275903	2	1146.6	3.6496	24.9129	1
DTNSkAYmcK	Sjc_0209670	1.4363e+06	49.53	3.0086e-05	2	1275.54	4.32702	20.3566	1
YIADkHNmLGGcPK	Sjc_0038300	1.64575e+07	57.99	1.78712e-05	2	1661.79	4.78563	22.4899	1
ESLNkLmK	Sjc_0054830	552586	26.66	0.0275112	2	1020.54	5.27767	24.3432	1
VVSGkAAkK	Sjc_0016080	5.40931e+07	76.03	2.00815e-07	2	971.593	4.48721	18.0888	2
AAGGkkHTK	Sjc_0058210	1.78287e+06	54.52	2.56058e-05	2	981.552	4.79183	15.0982	2
IIGSkkDQYFLDK	Sjc_0007580	7.78783e+06	39.65	0.00117606	2	1638.88	2.31852	33.9017	2
DTNSkAYMcK	Sjc_0209670	3.65671e+06	40.78	0.000242325	2	1259.55	4.70603	24.2764	1
ALAQkYNcEK	Sjc_0200460	1.53791e+06	45.71	0.000302101	2	1266.62	4.28265	22.5602	1
YIADkHNMLGGcPK	Sjc_0038300	7.92271e+06	55.86	3.51511e-05	2	1645.79	5.15431	26.9242	1
ANDSkFVVSFPGDGK	Sjc_0300470	1.21537e+06	34.43	0.00503007	2	1609.79	5.42609	35.6077	1
DEGDkWR	Sjc_0038300	3.58361e+07	36.05	0.00101808	2	947.426	4.20245	26.7725	1
DLITkLK	Sjc_0211260	805363	23.08	0.0278002	2	872.55	5.76723	33.553	1
DSESkITQTQK	Sjc_0200770	1.54639e+06	42.37	0.000764846	2	1306.65	3.31636	22.2035	1
ELMSkTEEFEEMK	Sjc_0027340	2.69782e+06	58.99	8.0757e-06	2	1672.75	4.52936	34.7378	1
GFGLkVWEVR	Sjc_0081150	991991	43.7	0.000490566	2	1232.68	4.51486	38.6253	1
GQFHkEFDNK	Sjc_0044580	1.1676e+06	32.59	0.00539792	2	1291.61	4.71674	22.6394	1
GSADkFLHSTPVAK	Sjc_0217610	1.95175e+06	63.74	5.30449e-06	2	1499.79	3.24874	27.4267	1
HEDAkMEIIR	Sjc_0106490	468464	20.94	0.0708733	2	1283.65	2.92201	26.6773	1
IAYSkDFETLK	Sjc_0038300	1.10689e+07	39.59	0.00123638	2	1356.71	5.51144	32.4303	1
IDISkFDVPK	Sjc_0078050	2.15658e+06	24.04	0.0516739	2	1203.67	5.38215	35.4107	1
KLGQkYIHEAK	Sjc_0211220	381562	21.02	0.0596962	3	1356.77	4.90755	19.4371	2
LIIEkPFGR	Sjc_0026090	2.03725e+06	26.85	0.0143544	2	1114.67	4.22303	34.5055	1
LQQNkLLR	Sjc_0112250	1.59191e+07	42.49	0.000321273	2	1054.64	4.36994	25.8784	1
LTAAkIR	Sjc_0213230	491311	29.92	0.0110008	2	814.518	3.76839	24.3479	1
MNDLkVSDR	Sjc_0300770	397972	55.75	3.11305e-05	2	1119.55	3.1316	24.8308	1
NEALkHR	Sjc_0078530	96432.4	27.52	0.0106207	2	909.494	4.73457	16.8023	1
NEWFkNSVLTK	Sjc_0002330	4005666	33.28	0.00686045	2	1407.73	3.80539	35.067	1
NLGTkFASK	Sjc_0211970	1.97586e+06	34.78	0.00342639	2	1007.56	3.86033	26.8148	1
NQLAkEYR	Sjc_0030210	974666	35.94	0.00375657	2	1063.56	4.39145	22.7288	1
NQVSkFNADIAALK	Sjc_0027340	1.77201e+06	68.67	1.62318e-06	2	1560.85	5.91431	35.5941	1
NVSVkDIR	Sjc_0054280	494850	30	0.014	2	972.552	4.30202	26.0573	1
QLATkAAR	Sjc_0079610	4.06325e+07	51.25	8.17385e-05	2	900.531	4.99811	19.1719	1
RSDDkPEALK	Sjc_0305220	1.97601e+06	31.75	0.0081538	2	1200.63	4.09982	20.4198	2
SDQTkHDPNYR	Sjc_0101350	154873	23.74	0.0247261	3	1402.64	2.82871	17.8097	1
SDYNkHSDENYGHR	Sjc_0065210	120153	20.43	0.0226433	3	1763.74	3.53217	19.0591	1
SLFGkDLITK	Sjc_0211260	5.54165e+06	49.46	6.56792e-05	2	1163.67	6.44669	35.9894	1
VFYLkMK	Sjc_0092590	765018	24.82	0.0303241	2	970.549	5.66097	32.9727	1
YLVEkFR	Sjc_0040720	1.43472e+06	26.19	0.0165901	2	996.556	4.89048	31.7573	1
YNVEkDIAAHVK	Sjc_0025920	2.80374e+06	35.43	0.00346566	3	1428.75	3.54345	29.5613	1
NAGkSADEmR	Sjc_0070960	295405	33.23	0.00292331	2	1136.51	4.65232	17.0036	1
VVGkSQSSmK	Sjc_0025560	911454	50.56	0.000131414	2	1108.57	4.03519	17.0508	1
LDHkFDLmYAK	Sjc_0049920	478412	22.21	0.0877714	3	1438.71	7.07399	30.1266	1
ALYkAmK	Sjc_0212110	621751	20.54	0.0565171	2	882.48	5.5309	20.9871	1
GLGkGGAkR	Sjc_0016100	2.52325e+08	42.94	0.000203264	2	927.541	4.40303	20.0544	2
ILSkLEHcPNMTLQEVTTDcQR	Sjc_0218800	1.02111e+06	28.75	0.021403	3	2715.3	5.33392	32.8996	1
SSDkPFcSSPEVTK	Sjc_0030250	1.3435e+06	57.01	1.75179e-05	2	1610.74	3.03863	27.3708	1
AFNkVAGDDGEIDADELR	Sjc_0300430	4.08489e+07	97.83	1.97779e-09	2	1976.93	4.02321	33.0845	1
AILkFPSLEAR	Sjc_0214960	4.87969e+06	25.98	0.0136268	2	1286.75	5.5858	37.134	1
ALLkELADFDSK	Sjc_0134610	2.86858e+07	74.86	4.53957e-07	2	1391.75	6.4909	38.5638	1
ALYkAMK	Sjc_0212110	2.67961e+06	30.29	0.00495765	2	866.484	4.20218	24.7687	1
AMEkYK	Sjc_0051340	327455	25.09	0.0168809	2	811.404	2.5782	20.0559	1
EAMkYAENLTVTHPIR	Sjc_0204420	9730937	24.76	0.0502964	3	1914.99	6.21042	30.7109	1
EIIkEVSGYIK	Sjc_0054280	4.31566e+06	38.64	0.000964249	2	1320.75	5.46678	34.1235	1
ELPkQLLR	Sjc_0208760	6.67477e+06	20.31	0.0288643	2	1038.64	5.06006	38.6379	1
GDVkTMSESLAIAR	Sjc_0063550	1.0154e+07	68.61	1.98318e-06	2	1519.78	4.13304	33.6043	1
GEEkSFFPEEISSMVLVAMK	Sjc_0044680	653123	30.11	0.0161361	3	2300.13	5.58828	48.8019	1
GLGkGGAK	Sjc_0016100	3.21124e+06	26.31	0.0230375	2	729.429	4.66567	17.602	1
GVLkVFLENVIR	Sjc_0016100	1.48932e+06	52.57	1.46638e-05	2	1428.86	5.09868	45.6628	1
HQYkDAFLK	Sjc_0112430	1.49872e+06	30.48	0.0128037	2	1191.62	2.50386	26.6441	1
LADkTVTPK	Sjc_0000130	279987	37.9	0.00213268	2	1014.59	5.49317	21.7219	1
LAEkEEEFEATR	Sjc_0054830	1.24024e+06	58.96	1.70892e-05	2	1493.72	3.7963	28.7295	1
LGDkWR	Sjc_0307260	1.09694e+06	24.3	0.0555445	2	816.438	2.26796	26.5046	1
LGQkYIHEAK	Sjc_0211220	6.87929e+06	32.82	0.0057986	2	1228.67	4.78378	21.6609	1
LSSkFDVR	Sjc_0035720	2.0529e+07	50.38	9.20802e-05	2	993.541	4.18568	28.5314	1
LTQkYDDLDDK	Sjc_0030640	624891	37.05	0.00225842	2	1395.67	4.63532	27.5031	1
NAGkSADEMR	Sjc_0070960	7.37849e+06	57.94	9.64165e-06	2	1120.51	3.66676	19.7265	1
NFQkILTK	Sjc_0205700	8.80824e+06	36.78	0.0013958	2	1033.61	4.6807	29.0408	1
NIDkFVSEAADLAGDFGNAAR	Sjc_0208800	6.34952e+06	81.34	1.15319e-07	2	2223.08	5.88456	45.9725	1
NNIkLYVR	Sjc_0044660	1.88332e+06	30.61	0.00703858	2	1061.61	4.06292	29.1804	1
SYSkHSR	Sjc_0094770	0	21.75	0.0675027	2	906.445	2.53701	16.439	1
TFGkSDFR	Sjc_0300880	755295	21.88	0.0434585	2	999.493	3.99152	28.7273	1
TLEkYER	Sjc_0215560	332455	22.38	0.0607001	2	980.51	5.83197	22.9406	1
VEQkFNK	Sjc_0002330	1.10101e+06	40.02	0.00126416	2	934.503	4.33085	20.4567	1
VFGkTYTTPR	Sjc_0304980	1.87855e+06	49.94	0.000107475	2	1211.65	2.98694	27.7385	1
VGQkIEIR	Sjc_0219200	479660	33.78	0.00305719	2	984.588	4.17419	25.7226	1
VKQkQLQQR	Sjc_0112250	105382	38.42	0.000618683	3	1197.71	5.90769	17.1072	2
VMSkVMPDEIYNLAAQSHVK	Sjc_0074530	1.94896e+07	30.1	0.0147563	3	2302.17	4.41505	36.7996	1
VTEkYTEEEQLNK	Sjc_0044660	9.24395e+06	83.3	6.64184e-08	2	1652.81	3.77448	26.291	1
VVDkYNR	Sjc_0003880	482958	37.82	0.00195757	2	935.497	3.08583	20.8207	1
VVGkYDNK	Sjc_0302840	1.74335e+06	33	0.00576365	2	964.513	3.18266	20.0942	1
YAGkHFR	Sjc_0209670	3.29678e+07	28.45	0.0172182	2	920.478	4.38193	19.655	1
YNLkQFQDIADSVK	Sjc_0076820	6996187	26.47	0.0338136	2	1710.88	4.78759	38.3601	1
FSkGEEDLmEK	Sjc_0035720	410643	39.27	0.000875451	2	1370.62	3.59769	26.0081	1
NLkNLANkR	Sjc_0093080	1.77506e+06	29.99	0.00566302	2	1154.67	4.46513	22.2735	2
GGkGLGkGGAk	Sjc_0016100	2.72716e+06	54.73	2.12002e-05	2	1055.59	3.87677	26.7391	2
DLkDDLkSDTSGDFR	Sjc_0101450	1.82975e+07	80.38	1.18192e-07	2	1795.84	5.01277	39.1227	2
GGkGLGkGGAK	Sjc_0016100	6.83874e+07	30.93	0.0065386	2	1013.58	4.7659	20.2908	2
ASkVkLPK	Sjc_0016080	1.54667e+08	55.94	9.42327e-06	2	954.602	3.98813	24.6448	2
SSkFPYcDGAHNK	Sjc_0074810	3.48872e+06	27.5	0.00986945	3	1552.69	4.21921	24.3642	1
AEkKSGVDR	Sjc_0208800	5.35609e+06	22.02	0.0982911	2	1031.54	-7.60762	24.8522	2
ASkQFTAR	Sjc_0021650	348869	29.4	0.0127445	2	950.51	4.5943	21.2407	1
DMkNAAFK	Sjc_0026230	457444	28.76	0.0157659	2	966.473	2.05793	26.8441	1
EAkYIAEDADR	Sjc_0304180	3.29066e+06	41.35	0.000769466	2	1322.63	3.88825	25.5501	1
ELkAMMER	Sjc_0212050	3.11783e+06	33.77	0.00459636	2	1049.52	4.18922	28.4143	1
FAkWR	Sjc_0031630	3.75035e+07	16.01	0.117787	2	749.411	2.67839	27.4939	1
FDkEEEFNQR	Sjc_0038640	649428	26.77	0.0147264	2	1383.63	6.17937	29.1045	1
FGkFIR	Sjc_0054830;Sjc_0035730	7.37566e+06	32.13	0.00324546	2	809.47	3.73075	29.9332	1
FGkFIR	Sjc_0054830;Sjc_0035730	7.37566e+06	32.13	0.00324546	2	809.47	3.73075	29.9332	1
FNkHVSSSR	Sjc_0032430	2.33372e+06	20.61	0.107751	3	1103.56	4.70336	18.883	1
FSkGEEDLMEK	Sjc_0035720	4.43941e+06	22.6	0.0450624	2	1354.63	4.57227	29.4374	1
FVkPVLK	Sjc_0026420	5.14387e+06	19.77	0.0469202	2	872.564	3.87712	29.1337	1
FVkYDEK	Sjc_0042440	8.17288e+06	33.24	0.00322485	2	970.493	4.62031	24.1267	1
HQkHQAFEAELAANAER	Sjc_0034150	757960	48.55	0.000213644	3	1991.98	3.58473	25.3534	1
KGkYDLDFK	Sjc_0209670	2.06106e+06	33.13	0.00520456	2	1155.61	4.57984	28.4225	2
KVkLPK	Sjc_0088690	1.27988e+06	18.82	0.0289571	2	754.522	3.99817	17.6366	2
LAkANGAAAVGK	Sjc_0031630	326679	39.17	0.00105927	2	1112.65	5.33381	21.2206	1
LAkYLSER	Sjc_0063550	3.37112e+07	39.19	0.00106646	2	1021.57	3.49396	26.6185	1
LEkENAMER	Sjc_0304180	907820	30.36	0.0110914	2	1161.56	6.4244	22.8432	1
LIkAHITSNNDK	Sjc_0069470	1.612e+06	40.63	0.000756847	2	1395.77	5.57901	20.9638	1
LSkEEIDR	Sjc_0044680	5.35609e+06	50.94	0.000126042	2	1031.54	3.28871	24.8522	1
LSkIEQPR	Sjc_0211970	7.82418e+06	51.68	4.04126e-05	2	1012.58	4.74561	22.7975	1
NTkYPLQR	Sjc_0046120	972738	23.17	0.0484358	2	1061.58	3.27042	24.6523	1
SNkFTVMK	Sjc_0302300	499375	29.67	0.0107355	2	996.52	1.80816	27.8818	1
TQkWSDK	Sjc_0077480	375417	32.28	0.00612266	2	934.465	2.05895	21.6877	1
VAkDFIELFGK	Sjc_0210170	1.39165e+06	52.7	3.81293e-05	2	1308.72	3.45874	40.8605	1
VAkDVFK	Sjc_0074580	2.43e+06	27.64	0.0188545	2	848.491	3.57449	25.9347	1
VEkYLPK	Sjc_0100170	3.52915e+06	29.78	0.00983584	2	918.534	4.38699	25.591	1
VNkTLDTK	Sjc_0054830	1.82554e+07	34.59	0.00356225	2	960.54	4.49282	21.0583	1
VQkHQNFEAEIQANQSR	Sjc_0034150	662145	29.21	0.0175127	3	2069.03	4.68946	25.9066	1
VQkQTVR	Sjc_0030710	1.34574e+06	35.13	0.00334523	2	900.53	3.72145	17.5921	1
WFkTNTPSGVDQQIR	Sjc_0304690	3.0776e+06	54.68	5.65078e-05	2	1818.92	4.55333	31.8919	1
NADMPEDMQQDAIEVATHAFEkYNIEK	Sjc_0080420	3.17552e+07	42.68	0.000606949	3	3179.44	4.03963	44.746	1
NADMSPEMQDDAVHVAASAMDkFDVEK	Sjc_0025950	3.72915e+07	62.03	3.69702e-06	3	2993.31	5.00688	41.1736	1
TkESEAIk	Sjc_0017220	477044	33.59	0.00570966	2	989.52	4.55424	23.0895	1
MkQQQkQQR	Sjc_0009730	1.41118e+06	41.81	0.00085363	2	1286.67	4.22762	17.1636	2
GkGGkGLGK	Sjc_0016100	2.00103e+07	44.88	0.000331589	2	885.52	4.83055	19.6897	2
GkGGkSR	Sjc_0063110	1.13126e+06	26.71	0.0321023	2	773.43	4.14099	16.4973	2
GkGGkTR	Sjc_0063130	643829	26.2	0.0316646	2	787.445	3.80301	16.6234	2
VkQkQLQQR	Sjc_0112250	751388	39.73	0.000399054	2	1239.72	5.02432	20.8533	2
AkETYR	Sjc_0057730	546497	27.24	0.0162367	2	809.418	3.98718	17.9263	1
AkLESTLDEMEENLAR	Sjc_0054830	2.34837e+07	98.53	2.41284e-09	2	1890.92	6.1266	40.745	1
AkSSLESQVDDLKR	Sjc_0027340	6.44436e+06	28.43	0.020671	3	1617.85	3.48141	27.9801	2
AkVIFVLGGPGSGK	Sjc_0212050	9.52333e+06	70.24	5.44086e-07	2	1371.81	4.40536	35.3468	1
AkYDVDK	Sjc_0303190	2.88872e+06	45.25	0.000317943	2	880.445	4.34616	21.7058	1
EkFEVDKDIATYIK	Sjc_0201980	2.84261e+06	47.5	0.000234733	2	1740.92	6.54909	35.3337	2
EkYDTVAK	Sjc_0102150	1.13697e+06	46.09	0.000190678	2	995.508	4.05235	21.8076	1
FkELLDK	Sjc_0081150	1.13164e+07	31.1	0.00791772	2	934.528	3.66317	29.5971	1
GkHFVEGGDFGNR	Sjc_0080800	808868	35.95	0.00240122	3	1461.69	5.29558	25.782	1
GkYDLDFK	Sjc_0209670	1.49562e+07	35.98	0.00230898	2	1027.51	5.0313	32.4785	1
IkDDIK	Sjc_0046730	8.04894e+06	30.89	0.0160497	2	773.444	4.69462	21.8858	1
IkELEER	Sjc_0054830	612112	25.02	0.045485	2	958.525	4.8363	23.2257	1
IkELQTR	Sjc_0054830	1.5163e+06	37.98	0.00206191	2	929.544	3.07981	22.3576	1
IkLEER	Sjc_0305830	1.22986e+06	31.22	0.0127233	2	829.482	4.48189	22.5563	1
IkYYSELR	Sjc_0300930	770043	23.37	0.0462558	2	1113.6	4.39672	29.2285	1
LkAQLEEVHEQMEGLR	Sjc_0054830	2.82871e+06	23.28	0.0725986	3	1952	5.25788	32.874	1
LkEEFEK	Sjc_0054830	651201	33.77	0.00549884	2	964.5	1.71637	24.8332	1
LkHTLK	Sjc_0005910	600094	20.54	0.0194875	2	781.497	4.54683	17.137	1
LkTLLENNLEAHIGR	Sjc_0066340	1.13701e+06	20.77	0.0607209	3	1762.99	3.89276	33.1853	1
LkVNETAK	Sjc_0049690	266687	31.52	0.00912578	2	944.544	2.73409	19.7695	1
MkGDYYR	Sjc_0092590;Sjc_0053680	3.90166e+06	22.16	0.0285823	2	974.444	4.12754	24.0427	1
MkGDYYR	Sjc_0092590;Sjc_0053680	3.90166e+06	22.16	0.0285823	2	974.444	4.12754	24.0427	1
NkEIFLR	Sjc_0012140	482804	20.87	0.0875757	2	961.55	3.96787	30.7386	1
NkYGWTPAHVAR	Sjc_0065210	499937	22.67	0.0713796	3	1441.74	4.67681	26.2736	1
NkYTEETIES	Sjc_0032430	1.39254e+06	27.8	0.0115341	2	1255.57	4.28493	29.6947	1
PkIVVEYK	Sjc_0044680	969900	23.4	0.0313105	2	1017.6	4.74003	28.077	1
PkSLSTEALMK	Sjc_0037110	1.75543e+06	35.24	0.00423405	2	1246.68	3.30821	30.1646	1
PkTLDVNK	Sjc_0025630	567054	26.36	0.0256639	2	956.545	3.5931	22.3963	1
QkLLKIIGDR	Sjc_0007000	2.07834e+06	13.25	0.104413	2	1225.77	4.67781	31.4756	2
SkEEVYK	Sjc_0301250	4.88702e+06	44.81	0.000290725	2	924.472	4.77136	20.8051	1
SkFDGTTVYAQNK	Sjc_0034190	3.28653e+06	34.96	0.00344686	2	1500.74	1.71578	28.4181	1
SkHESSLTELQDK	Sjc_0035730	258833	23.53	0.0541203	2	1543.77	4.2952	22.6885	1
SkLDAFK	Sjc_0046120	4.77656e+07	33.06	0.00721694	2	850.47	3.98271	29.7234	1
SkSDSHSASWK	Sjc_0203850	196218	30.94	0.00608061	2	1261.59	3.9194	18.4348	1
SkWLPK	Sjc_0214350	1.49066e+06	28.02	0.0229542	2	800.469	2.51997	27.9618	1
SkYHLQDVIIGK	Sjc_0077550	1.45246e+07	41.08	0.000775931	3	1442.81	4.80089	31.0085	1
TkLRLK	Sjc_0016190	935083	21.78	0.0162617	2	800.538	3.48041	23.049	2
VkDFLSR	Sjc_0043990	982199	39.22	0.00119076	2	906.508	4.3707	29.6474	1
VkDLETFLDDERR	Sjc_0027340	2.19937e+06	37.56	0.00283252	3	1677.85	4.55139	35.5633	2
VkHNDSSDPETGK	Sjc_0304610	147048	23.02	0.0401602	3	1455.68	4.25503	16.5094	1
VkHNDSSDPETGKK	Sjc_0304610	94366.8	20.08	0.123209	3	1583.77	5.14453	16.0368	2
VkQLYER	Sjc_0026420	3.34153e+06	33.25	0.0054649	2	977.546	5.06167	23.8837	1
VkSAFK	Sjc_0062310	203996	18.44	0.0844991	2	721.428	5.1992	20.3468	1
VkVGTEFVTK	Sjc_0054830	2.42725e+07	39.42	0.000760014	2	1149.66	3.99872	28.2984	1
VkYYPEEVSEDLVEDITR	Sjc_0100170	1.14334e+07	56.75	3.37102e-05	2	2226.09	4.94879	43.6348	1
YkLIVEK	Sjc_0124170	521458	28.03	0.00487935	2	934.565	3.9317	28.3604	1
YkSELSR	Sjc_0027340	6.21075e+06	36.67	0.00177604	2	924.483	4.50773	21.7457	1
YkSLDR	Sjc_0120910	1.57357e+06	32.87	0.00482849	2	823.434	4.0372	21.879	1
YkSNENPWFFHK	Sjc_0011460	4.36681e+06	31.67	0.00891808	3	1638.78	5.6589	32.1467	1
VGINYQPPTVVPGGDLAkVQR	Sjc_0049920	7.88732e+06	28.03	0.0102309	2	2250.23	4.54455	35.3447	1
TQEALQAEEDKVNHLNkLK	Sjc_0054830	2.11024e+07	33.85	0.00525424	3	2250.18	3.8669	28.765	2
IINEPTAAAIAYGLDkK	Sjc_0201800	1.05118e+06	33.16	0.00461321	2	1830.01	4.71075	36.6502	1
ALADHHVYLEGTLLkPNmVTAGQAcK	Sjc_0031630	9.89624e+06	47.06	0.000277472	3	2895.46	5.13223	31.6024	1
ALADHHVYLEGTLLkPNMVTAGQAcK	Sjc_0031630	8.56151e+06	38.67	0.00205105	3	2879.47	5.8324	33.4739	1
AFIEIDKDNNELIDkQELTK	Sjc_0081150	1.6956e+06	21.27	0.106369	3	2418.25	4.48726	35.3167	2
GAFQNIIPASTGAAkAVGK	Sjc_0025800	8.72365e+06	47.49	0.000160414	2	1843.02	5.65458	34.1928	1
LADEEDQAANLSEVkK	Sjc_0054830	577656	37.35	0.00267832	2	1801.89	4.13861	29.4914	1
MQENAVHIAAAALDkYNVEK	Sjc_0025920	1.94422e+07	70.37	1.40046e-06	3	2257.14	3.90396	36.4034	1
QVEEAEEIAAINLAkYR	Sjc_0054830	2.64001e+06	43.27	0.000682917	3	1989.04	4.08445	38.4834	1
LINQTVFPVTYTEkFYSDVLK	Sjc_0120450	2.4373e+07	41.26	0.000725724	3	2547.35	6.02723	44.7777	1
YQSTASGDEMTSLkEYVSR	Sjc_0044660	1.95378e+06	102.42	6.44396e-10	2	2194.01	6.87516	37.1464	1
ALKDQFESGDSIkLAK	Sjc_0044660	447288	26.72	0.0258569	3	1791.96	5.43202	30.2466	2
DNSGNNQDGPPTkFQR	Sjc_0111740	1.95733e+07	34.42	0.00314427	2	1816.83	3.56879	26.5423	1
IAGADIEHYLLEkSR	Sjc_0054830	2.375e+06	89.19	1.37374e-08	2	1756.93	6.25475	37.7538	1
MSENPISNNVPVkFR	Sjc_0004470	9.36031e+07	40.4	0.00145922	2	1773.9	4.74537	33.6401	1
VPHNAAVQIYDYkNK	Sjc_0044460	2.98239e+06	65.93	4.08432e-06	2	1801.93	3.82646	28.3468	1
YEEHLYERDEGDkWR	Sjc_0038300	2.46225e+06	24.28	0.0291135	3	2066.93	3.9845	27.2867	2
TLHFVVSDVEPkYYADGEDAYAmR	Sjc_0031810	7.3827e+06	45.99	0.000299604	3	2834.31	3.83115	36.0543	1
SDGQTPGLLEQkYTVcER	Sjc_0009730	3.63823e+06	60.17	1.26933e-05	2	2123.02	4.33763	33.5663	1
DLSPTDLVQIAkLAEQAER	Sjc_0030210	795160	23.75	0.0520795	3	2139.14	4.51297	46.5231	1
ENVHAAQEELLkLAK	Sjc_0031630	5.12412e+06	50.33	9.50001e-05	2	1734.94	3.21803	33.348	1
IDDFTIQEDQVkVAK	Sjc_0074580	1.42712e+06	59.98	1.54711e-05	2	1790.93	5.59226	33.2231	1
INVYYNEASGGkYVPR	Sjc_0060500;Sjc_0090690	4.38531e+06	92.4	9.72493e-09	2	1871.94	4.73376	31.7612	1
INVYYNEASGGkYVPR	Sjc_0060500;Sjc_0090690	4.38531e+06	92.4	9.72493e-09	2	1871.94	4.73376	31.7612	1
TLHFVVSDVEPkYYADGEDAYAMR	Sjc_0031810	4.61186e+07	49.71	0.000145391	3	2818.31	3.82447	37.0613	1
EAAESSLLAYkEAmK	Sjc_0204420	1760792	71.68	8.59193e-07	2	1698.83	4.69875	32.5919	1
EAAESSLLAYkEAMK	Sjc_0204420	6.66222e+06	84.35	5.0685e-08	2	1682.84	5.20357	36.5534	1
FDDASVQSDMkHWPFK	Sjc_0044680	4.78096e+07	34.41	0.00335075	2	1979.9	4.66615	36.917	1
FPIYTEQVALkYK	Sjc_0131210	2.47637e+06	44.23	0.000507835	2	1641.9	4.6858	36.1422	1
GTELLPGMEGkYVAR	Sjc_0211970	2.72989e+06	34.45	0.00550945	2	1662.86	4.13626	34.6535	1
HQGVMVGMGQkDSYVGDEAQSK	Sjc_0002370;Sjc_0042620	2.49076e+06	49.11	0.000131336	3	2393.1	4.72608	28.6436	1
HQGVMVGMGQkDSYVGDEAQSK	Sjc_0002370;Sjc_0042620	2.49076e+06	49.11	0.000131336	3	2393.1	4.72608	28.6436	1
LDHKFDLMYAkR	Sjc_0049920	0	23.79	0.056616	3	1578.82	3.40912	29.4764	2
TQEALQAEEDkVNHLNK	Sjc_0054830	1.4169e+07	73.88	6.60956e-07	2	2009	4.0459	30.3647	1
STTTGHLIYkcGGIDKR	Sjc_0054280	1.8485e+06	26.13	0.0376642	3	1949	4.07656	24.2804	2
AVVEEGQQLkYR	Sjc_0201350	772773	24.14	0.0580145	2	1461.77	2.6056	27.7149	1
FDEFEISGSkYAPEGIVYHHGR	Sjc_0047360	9.38125e+06	33.52	0.00698071	3	2580.23	3.76965	33.5683	1
FHDKPFNQGkIFK	Sjc_0042030	8.52292e+07	38.87	0.00194577	2	1647.87	3.58553	26.464	2
FWGDNFYNLkEK	Sjc_0012720	1.86406e+06	28.6	0.0172548	2	1602.77	5.44518	39.0364	1
GNPTVEVDLkTAK	Sjc_0209670	457417	36.23	0.00273967	2	1413.76	4.41356	29.3093	1
GTEAEDDNTkFK	Sjc_0079130	586166	24.76	0.0210543	2	1396.63	4.44467	23.3002	1
IEEELGSTAkYAGK	Sjc_0209670	3.81868e+07	77.53	2.26936e-07	2	1537.78	4.4228	28.1793	1
LNEYEIELLkK	Sjc_0024400	1390783	50.74	7.96951e-05	2	1433.79	3.28238	35.4432	1
MMMTSGQAVkYK	Sjc_0062310	2.30903e+06	56.94	2.10394e-05	2	1416.67	3.47373	27.4851	1
MYGALQGLNkSETAAK	Sjc_0304750	9.16167e+06	84.89	5.20565e-08	2	1723.88	4.69067	31.3405	1
SLHDALLVVkR	Sjc_0082530	1.63514e+06	40.44	0.000212358	2	1292.77	4.6624	31.326	1
VVEGEDVVTkMEK	Sjc_0001030	1.07715e+06	55.01	5.07956e-05	2	1504.76	4.35999	31.4475	1
WMDNNQLAEkEEFEEK	Sjc_0044680	7.66096e+06	57.19	1.45149e-05	2	2081.92	4.3344	34.7204	1
kHNMmGDTDDEYYIIEK	Sjc_0063550	8599626753	69.98	3.71708e-07	3	2159.93	1.91147	32.0971	1
kHNmmGDTDDEYYIIEK	Sjc_0063550	3637084453	63.92	1.2368e-06	3	2175.92	0.335374	30.5882	1
kGNTSTASkR	Sjc_0112250	474442	65.87	3.85644e-06	2	1133.6	4.43153	16.9569	2
kQLATk	Sjc_0079610	635668	19.52	0.122297	2	772.46	4.08948	24.9795	1
kQLATkAAR	Sjc_0079610	9.19049e+08	60.42	8.53351e-06	2	1070.64	3.57203	21.7043	2
kSTGGkAPR	Sjc_0079610	6.56815e+07	55.09	3.28326e-05	2	985.547	4.97248	17.3436	2
kVkLPK	Sjc_0088690	2.68516e+07	17.52	0.0451378	2	796.532	4.08638	22.7386	2
kHHTFEcELAR	Sjc_0017310	474571	24.97	0.0327972	3	1469.7	4.30398	21.1649	1
kDIETLTK	Sjc_0000230	298592	31.02	0.00747191	2	989.555	3.62076	26.917	1
kHAETELEETQSR	Sjc_0027340	3.0869e+06	66.45	2.40052e-06	2	1599.77	4.08644	20.6753	1
kHLEDEHER	Sjc_0050230	709291	39.75	0.00108574	3	1234.59	5.44914	16.795	1
kHLLATSPK	Sjc_0063550	1.65892e+08	41.98	0.000199669	2	1036.62	4.51487	19.9829	1
kHNMMGDTDDEYYIIEK	Sjc_0063550	1.7794e+10	89.85	5.90031e-09	2	2143.94	4.79843	31.8694	1
kHQETIVNALK	Sjc_0080950	525171	18.35	0.0833441	2	1322.75	3.41235	24.5854	1
kMIGLVLGILR	Sjc_0203740	1.47851e+06	21.79	0.0146135	3	1254.8	-1.2003	25.5525	1
kSAPSTGGVK	Sjc_0079610	752196	29.99	0.0148341	2	973.536	4.53693	18.4516	1
kVEVQEFEDIK	Sjc_0002330	2.09548e+06	34.54	0.00580075	2	1405.73	6.41785	32.5515	1
kYAELHK	Sjc_0042030	470409	27.5	0.0257851	2	930.507	2.57404	19.2241	1
kYDEAAR	Sjc_0304180	1.04292e+06	22.13	0.0615412	2	894.435	3.43529	18.7713	1
kYDIEK	Sjc_0052810	2.0416e+06	22.33	0.0526311	2	837.439	3.93927	22.5546	1
kYDLNGDKEWDIDELVK	Sjc_0102250	4.51559e+06	35.8	0.0043794	3	2122.05	5.2557	37.3724	2
kYLVLR	Sjc_0054830	6.09201e+06	30.17	0.00212205	2	833.528	4.20301	29.6435	1
kYQSVTGGIQR	Sjc_0035730	1.55071e+06	55.42	3.93297e-05	2	1278.68	3.32957	24.3854	1
kYYESTK	Sjc_0066490	759208	21.8	0.0558286	2	960.472	4.99462	20.0326	1
AFSEVcSNPAAMDkYK	Sjc_0200640	1291268	59.66	8.2189e-06	2	1859.84	5.9284	31.2175	1
DLLTcFLkPK	Sjc_0054830	1.77441e+06	38.28	0.00166425	2	1276.71	6.34087	42.7858	1
TSGTcAHkLFER	Sjc_0204960	1.35267e+06	35.77	0.0037079	2	1448.7	3.19206	24.4528	1
IDQNcVVGLAYkLK	Sjc_0200380	6.24664e+06	49.83	0.000144029	2	1662.9	5.31849	37.0315	1
ALcTGEkGYGYK	Sjc_0001030	3.01815e+06	46.37	0.000202994	2	1388.66	3.70395	25.9229	1
VNcGLIkMYK	Sjc_0303020	2.77872e+06	29.39	0.0132342	2	1267.66	3.9117	31.4881	1
IDcHFkSVINR	Sjc_0083470	7.7502e+06	45.03	0.000425539	2	1430.73	6.34485	28.5331	1
IcELQkSAAEcQK	Sjc_0088790	310948	61.3	9.97062e-06	2	1606.76	4.46432	24.754	1
FcTSkYDVTVIDAPGHR	Sjc_0054280	1.69727e+07	32.76	0.00693859	3	2007.97	4.96679	31.5966	1
HcFQkQLSTK	Sjc_0303480	7.7024e+06	41.31	0.00103915	2	1318.66	2.50236	21.4068	1
LcLTkQELYK	Sjc_0207310	1.32941e+07	65.4	3.7204e-06	2	1337.72	4.31594	31.7501	1
NckFNPK	Sjc_0043930	2.51912e+06	19.81	0.115442	2	949.461	5.19747	21.6417	1
GcQGLTVLDDGAGGkK	Sjc_0300100	1.65369e+06	72.26	8.97381e-07	2	1617.8	5.36867	30.167	1
LSGAGGGGGHScGSGGSSSNkSSNSK	Sjc_0008040	102752	28.62	0.00604578	3	2323.01	3.85059	16.5491	1
cLEkDVK	Sjc_0092490	558347	25.4	0.0392228	2	933.476	5.37827	21.4505	1
cGLcNkmLDSTTVAEHEGEVYcK	Sjc_0202230	1.00131e+06	39.83	0.000493962	3	2759.19	4.0961	30.4384	1
cGLcNkMLDSTTVAEHEGEVYcK	Sjc_0202230	7.56256e+06	57.48	9.82568e-06	3	2743.2	4.55802	33.5268	1
cTNcGRAcPkDK	Sjc_0049740	4.0119e+07	22.2	0.013297	3	1463.6	-8.05684	17.1733	2
